# Supplementary material for: Cohort profile: Resettlement in Uprooted Groups Explored (REFUGE)—a longitudinal study of mental health and integration in adult refugees from Syria resettled in Norway between 2015 and 2017
Source: PubMed Central journal article supplement — BMJ Open. 2020 Jul 1;10(7):e036101. doi: 10.1136/bmjopen-2019-036101 (PMC7332190; doi:10.1136/bmjopen-2019-036101), 2020-07-01
Supplement: bmjopen-2019-036101.draft_revisions.pdf [file bmjopen-2019-036101.draft_revisions.pdf]

# BMJ Open

BMJ Open is committed to open peer review. As part of this commitment we make the peer review history of every article we publish publicly available.

When an article is published we post the peer reviewers' comments and the authors' responses online. We also post the versions of the paper that were used during peer review. These are the versions that the peer review comments apply to.

The versions of the paper that follow are the versions that were submitted during the peer review process. They are not the versions of record or the final published versions. They should not be cited or distributed as the published version of this manuscript.

BMJ Open is an open access journal and the full, final, typeset and author-corrected version of record of the manuscript is available on our site with no access controls, subscription charges or pay-per-view fees (<http://bmjopen.bmj.com>).

If you have any questions on BMJ Open's open peer review process please email [info.bmjopen@bmj.com](mailto:info.bmjopen@bmj.com)

# BMJ Open

**Cohort profile: Resettlement in Uprooted Groups Explored (REFUGE) – A longitudinal study of mental health and integration in adult refugees from Syria resettled in Norway between 2015 and 2017**

|                               |                                                                                                                                                                                                                                                                                                                                                                                                                                                                           |
|-------------------------------|---------------------------------------------------------------------------------------------------------------------------------------------------------------------------------------------------------------------------------------------------------------------------------------------------------------------------------------------------------------------------------------------------------------------------------------------------------------------------|
| Journal:                      | <i>BMJ Open</i>                                                                                                                                                                                                                                                                                                                                                                                                                                                           |
| Manuscript ID                 | bmjopen-2019-036101                                                                                                                                                                                                                                                                                                                                                                                                                                                       |
| Article Type:                 | Cohort profile                                                                                                                                                                                                                                                                                                                                                                                                                                                            |
| Date Submitted by the Author: | 29-Nov-2019                                                                                                                                                                                                                                                                                                                                                                                                                                                               |
| Complete List of Authors:     | Nissen, Alexander ; Norwegian Center for Violence and Traumatic Stress Studies<br>Cauley, Prue; Norwegian Center for Violence and Traumatic Stress Studies<br>Saboonchi, Fredrik; Red Cross University College, Department of Health Sciences; Karolinska Institute, Department of Clinical Neuroscience<br>Andersen, Arnfinn; Norwegian Center for Violence and Traumatic Stress Studies<br>Solberg, Øivind; Norwegian Center for Violence and Traumatic Stress Studies, |
| Keywords:                     | MENTAL HEALTH, EPIDEMIOLOGY, PUBLIC HEALTH                                                                                                                                                                                                                                                                                                                                                                                                                                |
|                               |                                                                                                                                                                                                                                                                                                                                                                                                                                                                           |

SCHOLARONE™  
Manuscripts

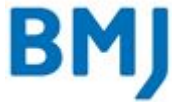

I, the Submitting Author has the right to grant and does grant on behalf of all authors of the Work (as defined in the below author licence), an exclusive licence and/or a non-exclusive licence for contributions from authors who are: i) UK Crown employees; ii) where BMJ has agreed a CC-BY licence shall apply, and/or iii) in accordance with the terms applicable for US Federal Government officers or employees acting as part of their official duties; on a worldwide, perpetual, irrevocable, royalty-free basis to BMJ Publishing Group Ltd ("BMJ") its licensees and where the relevant Journal is co-owned by BMJ to the co-owners of the Journal, to publish the Work in this journal and any other BMJ products and to exploit all rights, as set out in our [licence](#).

The Submitting Author accepts and understands that any supply made under these terms is made by BMJ to the Submitting Author unless you are acting as an employee on behalf of your employer or a postgraduate student of an affiliated institution which is paying any applicable article publishing charge ("APC") for Open Access articles. Where the Submitting Author wishes to make the Work available on an Open Access basis (and intends to pay the relevant APC), the terms of reuse of such Open Access shall be governed by a Creative Commons licence – details of these licences and which [Creative Commons](#) licence will apply to this Work are set out in our licence referred to above.

Other than as permitted in any relevant BMJ Author's Self Archiving Policies, I confirm this Work has not been accepted for publication elsewhere, is not being considered for publication elsewhere and does not duplicate material already published. I confirm all authors consent to publication of this Work and authorise the granting of this licence.

1  
2  
3 **Cohort profile: Resettlement in Uprooted Groups Explored (REFUGE) – A longitudinal**  
4 **study of mental health and integration in adult refugees from Syria resettled in Norway**  
5 **between 2015 and 2017**  
6  
7  
8  
9

10  
11 Alexander Nissen<sup>1</sup>, Prue Cauley<sup>1</sup>, Fredrik Saboonchi<sup>3,4</sup>, Arnfinn Andersen<sup>1</sup> &  
12 Øivind Solberg<sup>2</sup>  
13  
14

15  
16  
17  
18 1. Division for Forced migration and Disaster research, Norwegian Centre for Violence and  
19 Traumatic Stress Studies, Oslo, Norway  
20

21  
22 2. Division for Implementation and Treatment Research, Norwegian Centre for Violence and  
23 Traumatic Stress Studies, Oslo, Norway  
24

25  
26 3. Department of Health Sciences, Red Cross University College, Stockholm, Sweden  
27

28  
29 4. Division of Insurance Medicine, Department of Clinical Neuroscience, Karolinska  
30 Institutet, Stockholm, Sweden  
31  
32  
33  
34  
35  
36  
37  
38  
39  
40  
41  
42

43 Corresponding author:  
44

45 M.D., M.Sc. Alexander Nissen  
46

47 P.box 181 Nydalen, 0409 Oslo, Norway  
48

49 Email: a.f.w.nissen@nkvts.no  
50

51 Phone: +47 91623650  
52  
53  
54  
55  
56  
57  
58

59 **KEYWORDS:** Refugees; cohort; Syria; mental health; integration  
60

## ABSTRACT

**Purpose:** The REFUGE-study was initiated in order to enhance current knowledge on mental health and quality of life among adult refugees from Syria resettled in Norway. The main aim of the study is to investigate how mental health may affect integration in the years following resettlement. This aim will be pursued by combining data from a longitudinal, three-wave questionnaire survey with data from population-based registries on education; work participation and sick-leave; health-care utilization; and drug prescription. The goal is to incorporate the data in an internationally shared database, the REFUGE-database, where collaborating researchers may access and use data from the study as well as deposit data from similar studies.

**Participants:** The first wave of the REFUGE-study (REFUGE-I) was launched in November 2018 and completed in September 2019. Of the initial 9,990 sampled individuals, 8,752 were reached either by post or telephone and 902 responded (response rate = 10.3%). The data gathered includes extensive sociodemographic information, pre-, peri- and post-migratory stress variables, and measures of mental health and quality of life. The data also features measures of sleep difficulties, smoking, alcohol and drug use in addition to markers of physical health (e.g. head, neck and back pain).

**Findings to date:** To date, no findings have been published.

**Future plans:** The REFUGE-cohort study will conduct a second wave of data collection in 2020. A third wave of data collection is planned in 2021, pending funding. Furthermore, questionnaire data will be linked to population-based registries in Norway after all three waves of data collection have been completed. Registry data will be obtained for time-periods both prior to and after the period of data collection. Finally, pending ethics approval, we will begin the process of merging the Norwegian REFUGE-cohort with existing datasets in Sweden, establishing the extended REFUGE-database.

### Strengths and Limitations

- The study features a large sample of both male and female adult refugees from Syria who were resettled in a high-income country between 2015 and 2017.
- Study participants were selected through random sampling from a population-based source population identified using Norway's National Registry – i.e. all refugees from Syria residing in Norway who met inclusion criteria had equal probability of selection.
- The study will use a three-wave survey design which will enable longitudinal tracking of self-reported mental health and other key measures.
- The study will link data from the three-wave, questionnaire survey to data in Norway's large, population-based registries on education, work participation and sick-leave, health-care utilization and drug prescription; as well as to other datasets/data sources within the EU.
- Initial data collection yielded a low response rate, despite extensive recruitment efforts.

## INTRODUCTION

The adversities of forced migration make the current population of more than 70 million forcibly displaced people especially vulnerable. Exposure to potentially traumatic events (PTEs) such as torture, war and/or violence-related traumas prior to or during forced migration, as well as post-migration socioeconomic hardships and social isolation constitute profound risks for mental ill health, with potential long-lasting effects[1–3].

Given the aforementioned high burden of mental ill health in refugee populations and the centrality of *functional impairment* in the diagnostic frameworks for PTSD, anxiety and depression in the main diagnostic manuals[4,5], few studies have looked at integration in relation to mental health within refugee populations. The studies available show that general health problems, as well as symptoms of PTSD and depression, are adversely associated with economic and social integration[6,7], with one study finding mental health to be a mediator between post-migration stressors and integration[8]. Longitudinal studies with large sample sizes and rigorous methodology are lacking and therefore warranted in order to better understand the mental health burden of refugees resettled in a host country.

Accordingly, the REFUGE-study was initiated in order to enhance current knowledge on mental health and quality of life among adult refugees from Syria resettled in Norway following the 2011 outbreak of the civil war in Syria. The main objective is to investigate how mental health may affect integration in the years following resettlement. This will be done through a planned longitudinal, three-wave survey design linked to population-based registries in Norway on education; work participation and sick-leave; health-care utilization; and drug prescription.

A broader, secondary aim is to extend the REFUGE-study beyond Norway's borders, through collaboration between the REFUGE-study group in Norway and partner institutions in Sweden and the United Kingdom, forming the REFUGE-consortium. This work, pending ethics approval, will include setting up and servicing a shared database that exploits the research potential that lies within the existing datasets on resettled refugees from Syria in Norway and Sweden ( $N > 4,500$ ).

A tertiary, long-term goal is to further expand the REFUGE-database by encouraging researchers in other countries to complete similar, nation-wide data-collections that can be added to the existing database. In turn, given the extensive number of included participants, the REFUGE-database will have ample opportunities to provide unique cross-country,

1  
2  
3 intersectional, comparative analyses that can provide robust explanatory models of refugees'  
4 health and social outcomes, in turn informing social policy and practice.  
5  
6

7 At the time of writing this cohort profile, the first wave of the three-wave survey design has  
8 been completed. The REFUGE-study is registered in the ClinicalTrials.gov database  
9 (NCT03742128).  
10  
11  
12  
13

## 14 **COHORT DESCRIPTION**

### 15 **Setting**

16 The study is set in Norway, a high-income country, with a population of 5.3 million people.  
17 Approximately 4.5% of the Norwegian population has a refugee background. The Directorate  
18 of Immigration (UDI) is the central agency in the Norwegian immigration administration.  
19 UDI facilitates lawful immigration and ensures that those who meet the requirements for  
20 residency are given an opportunity to come to Norway. Since its onset in 2011, the civil war  
21 in Syria has forced more than 6.5 million Syrian citizens to flee the country as refugees, of  
22 which an estimated one million have reached Europe, excluding Turkey[9,10]. At the time of  
23 primary data collection, forced migrants from Syria therefore constituted the largest group of  
24 newly resettled refugees and asylum-seekers in Norway.  
25  
26  
27  
28  
29  
30  
31  
32  
33

### 34 **Eligibility**

35 The source population for the REFUGE-study cohort was defined by the following three  
36 criteria: Potential participants had to be (1) Syrian citizens who arrived in Norway as either a  
37 resettlement refugee (quota refugee), an asylum seeker, or through Norway's family reunion  
38 program, (2) granted permanent or temporary residency and registered with an address in  
39 Norway between January 1, 2015 and December 31, 2017, and finally, (3) 18 years of age or  
40 older at the time the sample was drawn from the source population.  
41  
42  
43  
44  
45  
46  
47

48 These criteria were sent to the Norwegian National Registry (NNR) who generated a list of  
49 potential participants (N = 14,350) from their database consisting of all individuals residing in  
50 Norway at that time. A simple, random, equal probability sample of 9,990 Syrian citizens was  
51 then drawn in August, 2018.  
52  
53  
54  
55

### 56 **Study preparation and promotion**

57 In initial stages of development, approximately a year before the commencement of the data  
58 collection, an early version of the questionnaire was tested in a reception centre. Arabic  
59  
60



1  
2  
3 speaking asylum seekers filled out the survey and participated in focus groups with the aim of  
4 testing and tailoring the questionnaire for length, comprehension and cultural sensitivity.  
5 Several amendments to the questionnaire then followed as a result of the feedback obtained in  
6 these focus groups. Findings from this preliminary stage also prompted the creation of a user  
7 reference-group, consisting of six Syrians living in Norway. This user reference-group served  
8 as an advisory board throughout the planning, development and implementation of the study.  
9  
10  
11  
12  
13  
14

15 Additionally, prior to data collection, a number of strategies were employed in order to inform  
16 potential participants about the study and boost participation. Key persons within the  
17 community were identified and contacted in order to discuss ways to explain and promote the  
18 study through social media and other channels. Based on input from these sources, several  
19 short, animated movies were made in Arabic in order to explain why the study was being  
20 undertaken, what participation entailed, and how key issues in research, such as informed  
21 consent, confidentiality, data handling, and privacy rights, would be handled. REFUGE web  
22 and Facebook pages were also created in both Arabic and Norwegian, conveying the same  
23 information as the movies, in more detail. The Facebook page, with Q&A, was continuously  
24 supervised and moderated by a native Arabic speaker.  
25  
26  
27  
28  
29  
30  
31  
32  
33

34 In order to reach a wider range of potential participants, in-person and paper-based  
35 dissemination of information also took place. Information and Q&A sessions at Adult  
36 Education centers (VOs) in Norway's larger cities were held by the REFUGE team members,  
37 including an Arabic interpreter from Syria who was involved in the study from the beginning.  
38 Information about the study was also sent to local community refugee centers throughout  
39 Norway. These centers work with refugees on a daily basis, assisting and counselling them on  
40 various matters related to the integration process into Norway.  
41  
42  
43  
44  
45  
46  
47

### 48 **Sampling**

49 The first wave of the REFUGE-study (REFUGE-I) was launched at the end of November  
50 2018. Each of the 9,990 sampled Syrian refugees were sent an envelope containing the study  
51 questionnaire, a cover letter in Arabic and a prepaid return envelope. The cover letter  
52 explained the purpose and voluntary nature of the study, what participation entailed, and  
53 issues surrounding confidentiality and data handling. It also included a space for willing  
54 participants to provide written informed consent in the form of a signature.  
55  
56  
57  
58  
59  
60

1  
2  
3 The address list provided by the Norwegian National Registry (NNR) included 1,235  
4 addresses where the addressee was either not found or could not be reached. These potential  
5 participants were never found and therefore excluded from the study. Current rules for  
6 conducting research surveys in Norway prohibit more than one reminder being sent out to  
7 non-responders to encourage participation. Based on a small pilot project testing the use of  
8 telephone reminders with Arabic speaking personnel conducted on 530 non-responders in the  
9 sample, it was decided that telephone reminders would be used for all non-responders with an  
10 available telephone number (N = 5,675). Telephone contact was made with less than half of  
11 this group (N = 2,087). Table S1 in the supplementary material summarizes the answers given  
12 by this group when asked to participate. The telephone reminders were conducted in late  
13 March and early April, 2019. A postal reminder which included the questionnaire, the cover  
14 letter with informed consent and a prepaid return envelope was also sent out to non-  
15 responders who were not reached via telephone (N = 5,000). The postal reminder was sent out  
16 in early June, 2019. Figure 1 summarizes the flow of participants through REFUGE-I, and  
17 Table 1 provides comparative statistics on participants in REFUGE-I vs. the source and  
18 sample population. Of the initial 9,990 sampled individuals, 8,752 were reached either by post  
19 or telephone and 902 returned the questionnaire (response rate = 10.3% if non-contacts are  
20 excluded). Of the 902 responders, 665 (73.2%) were willing to take part in later waves of the  
21 study.  
22  
23  
24  
25  
26  
27  
28  
29  
30  
31  
32  
33  
34  
35  
36

37 According to the original plan registered at ClinicalTrials.gov, data collection was planned to  
38 run for about 6-8 weeks. However, due to a very low response rate at the time of the planned  
39 closing date in mid January 2019, the study was extended, and the final closing date was in  
40 early September 2019. All procedures concerning the selection and recruitment of  
41 participants, including consent procedures, were approved by the Regional Committees for  
42 Medical and Health Research Ethics (REC) - Region South East (A) in Norway. Reference  
43 number 2017/1252.  
44  
45  
46  
47  
48  
49  
50  
51  
52  
53  
54  
55  
56  
57  
58  
59  
60

Table 1. Demographic characteristics of participants vs. the source and sample populations

|                                         | Source population<br>N = 14,350 |        | Sample population<br>N = 9,990 |        | Participants<br>N = 902 |        | Participants willing to take part<br>in subsequent surveys<br>N = 665 |        |
|-----------------------------------------|---------------------------------|--------|--------------------------------|--------|-------------------------|--------|-----------------------------------------------------------------------|--------|
|                                         | n                               | (%)    | n                              | (%)    | n                       | (%)    | n                                                                     | (%)    |
| <b>Gender</b>                           |                                 |        |                                |        |                         |        |                                                                       |        |
| Female                                  | 5,117                           | (35.7) | 3,552                          | (35.5) | 320                     | (35.5) | 236                                                                   | (35.5) |
| Male                                    | 9,233                           | (64.3) | 6,446                          | (64.5) | 582                     | (64.5) | 429                                                                   | (64.5) |
| <b>Age<sup>1</sup></b>                  |                                 |        |                                |        |                         |        |                                                                       |        |
| 18-29                                   | 6,135                           | (42.8) | 4,265                          | (42.7) | 197                     | (21.8) | 148                                                                   | (22.2) |
| 30-39                                   | 4,769                           | (33.2) | 3,315                          | (33.1) | 310                     | (34.4) | 218                                                                   | (32.8) |
| 40-49                                   | 2,263                           | (15.8) | 1,604                          | (16.0) | 230                     | (25.5) | 173                                                                   | (26.0) |
| 50-64                                   | 1,034                           | (7.2)  | 721                            | (7.2)  | 145                     | (16.1) | 112                                                                   | (16.9) |
| >64                                     | 149                             | (1.0)  | 95                             | (1.0)  | 20                      | (2.2)  | 14                                                                    | (2.1)  |
| <b>Civil status<sup>1</sup></b>         |                                 |        |                                |        |                         |        |                                                                       |        |
| Unmarried                               | 5,879                           | (41.0) | 4,047                          | (40.5) | 236                     | (26.1) | 176                                                                   | (26.5) |
| Married                                 | 7,873                           | (54.8) | 5,545                          | (55.5) | 595                     | (66.0) | 433                                                                   | (65.1) |
| Other <sup>2</sup>                      | 598                             | (4.2)  | 398                            | (4.0)  | 71                      | (7.9)  | 56                                                                    | (8.4)  |
| <b>Year granted residency in Norway</b> |                                 |        |                                |        |                         |        |                                                                       |        |
| 2015                                    | 2,993                           | (20.8) | 2,081                          | (20.8) | N/A <sup>3</sup>        |        | N/A <sup>3</sup>                                                      |        |
| 2016                                    | 7,513                           | (52.4) | 5,267                          | (52.7) |                         |        |                                                                       |        |
| 2017                                    | 3,844                           | (26.8) | 2,652                          | (26.5) |                         |        |                                                                       |        |

<sup>1</sup> Age and civil status for the two participating groups was based on participants' answers in the questionnaire.

<sup>2</sup> Includes widow(er), separated, divorced

<sup>3</sup> Individual-level data on the year residency was granted was not provided by the Norwegian National Registry.

## METHODS

Three waves of questionnaire surveys are planned for the REFUGE-study (REFUGE-I, II, and III). Collection for REFUGE-I has already been completed as described above. REFUGE-II and III are scheduled to be carried out roughly one and two years after REFUGE-I, respectively. The questionnaire used will be very similar for all three waves of the study. Key variables are highlighted in Table 2 below.

Table 2. Summary of key measures used in the longitudinal, three-wave, questionnaire survey

|                                                                                             | Measure used <sup>1</sup>                                         | Comments                                                                                                                         |
|---------------------------------------------------------------------------------------------|-------------------------------------------------------------------|----------------------------------------------------------------------------------------------------------------------------------|
| <b>Outcome variables</b>                                                                    |                                                                   |                                                                                                                                  |
| Symptoms of PTSD                                                                            | Harvard Trauma Questionnaire, HTQ                                 | The first 16 items on trauma symptoms in section IV will be used                                                                 |
| Symptoms of anxiety and depression                                                          | Hopkins Symptom Checklist, HSCL-25                                | The first 10 of the total 25 items will be used to measure symptoms of anxiety and the last 15 to measure symptoms of depression |
| Quality of life                                                                             | World Health Organization Quality of Life assessment, WHOQOL-BREF | The scale consists of 26 items and all will be included                                                                          |
| Somatic pain                                                                                | Questions adapted from the Tromsø Study                           | 10 questions will be used, 5 concerning muscle/joint pain and 5 concerning more general somatic pain                             |
| Perceived general health                                                                    | European Social Survey                                            | 2 items from the scale will be included                                                                                          |
| Sleep difficulties                                                                          | The Bergen Insomnia Scale                                         | The scale consists of 6 items and all will be included                                                                           |
| <b>Predictor variables</b>                                                                  |                                                                   |                                                                                                                                  |
| Potentially traumatic experiences <i>before</i> the flight from Syria (pre-migratory PTEs)  | The Refugee Trauma History Checklist, RTHC                        | The scale consists of 8 items and all will be included                                                                           |
| Potentially traumatic experiences <i>during</i> the flight from Syria (peri-migratory PTEs) | The Refugee Trauma History Checklist, RTHC                        | The scale consists of 8 items and all will be included                                                                           |
| Post-migration stressful experiences                                                        | Post-migration stress scale                                       | The scale consists of 24 items and all will be included                                                                          |
| Social support                                                                              | ENRICH Social Support Inventory                                   | The first 6 items of the scale will be included                                                                                  |

<sup>1</sup> Further information on the measures used can be found in the ClinicalTrials.gov database where the study is registered (NCT03742128)

## Measures

In addition to the outcome variables listed in Table 2, the following measures are included in the questionnaire:

## Outcomes

Complementary to the Harvard Trauma Questionnaire, an item is included regarding re-experiencing traumatic events or intrusive memories, which asks whether the participant experiences this, how often, and how distressing this is. Also included in the questionnaire is an item on daily effects of chronic physical illness, disability, infirmity or mental health problem/s.

## Predictors

In addition to the predictors listed in Table 2, the survey includes questions regarding violence and threats experienced since the participant's arrival in Norway, such as physical violence, threats, and theft. As an addition to the social support scale (ESSI), 3 items have been included to assess how easily the respondent can get help from neighbours, how many people the participant can count on when serious problems occur, and how much concern people show in what the respondent is doing.

## Sociodemographics

Important background and demographic variables include: gender, age, marital status, number of children, education, refugee status upon arrival (i.e. asylum seeker, quota refugee, family reunion, or other), whether the participant fled Syria alone or with a partner, family and/or friends, whether other family members had already settled in Norway prior to refugee's arrival in the country, time elapsed between when a participant fled Syria and arrived in Norway, and time in Norway prior to participating in the study. Tables 3 and 4 provide descriptive statistics on participants on the aforementioned variables from the first wave of data collection. The number of participants with missing values across variables can be interpreted from the table (applies for all tables).

Additional sociodemographic data collected include: smoking; alcohol and drug use; employment status; job satisfaction; self-reported competence in English and Norwegian language; and years of education completed. Further details on the scales used, their psychometric properties and how variables will be handled in analyses can be found in the ClinicalTrials.gov registration (NCT03742128).

The administration and logistics of the survey was handled by the research and consulting firm, Ipsos, which has extensive experience with and infrastructure for these types of surveys.

Ipsos is also responsible for securely storing participants' Norwegian identity numbers so that longitudinal tracking of individuals and linking to registry data is possible. The identity numbers are unknown to all researchers involved.

Table 3. Descriptive statistics on participating refugees from Syria

|                                                   | Participants, N = 902 |         | Participants willing to take part in longitudinal questionnaire survey, N = 665 |         |
|---------------------------------------------------|-----------------------|---------|---------------------------------------------------------------------------------|---------|
|                                                   | n                     | (%)     | n                                                                               | (%)     |
| <b>Number of children</b>                         |                       |         |                                                                                 |         |
| I do not have children                            | 271                   | (31.6)  | 213                                                                             | (33.5)  |
| 1                                                 | 63                    | (7.4)   | 44                                                                              | (6.9)   |
| 2                                                 | 125                   | (14.6)  | 86                                                                              | (13.5)  |
| 3                                                 | 139                   | (16.2)  | 103                                                                             | (16.2)  |
| 4                                                 | 101                   | (11.8)  | 78                                                                              | (12.3)  |
| 5                                                 | 77                    | (9.0)   | 53                                                                              | (8.3)   |
| 6 or more                                         | 81                    | (9.5)   | 59                                                                              | (9.3)   |
| Total                                             | 857                   | (100.0) | 636                                                                             | (100.0) |
| <b>Education</b>                                  |                       |         |                                                                                 |         |
| 9 years or less                                   | 394                   | (44.7)  | 281                                                                             | (43.0)  |
| 10-12 years                                       | 158                   | (17.9)  | 116                                                                             | (17.8)  |
| More than 12 years                                | 330                   | (37.4)  | 256                                                                             | (39.2)  |
| Total                                             | 882                   | (100.0) | 653                                                                             | (100.0) |
| <b>Refugee status upon arrival</b>                |                       |         |                                                                                 |         |
| Asylum seeker                                     | 454                   | (52.5)  | 325                                                                             | (51.0)  |
| Quota refugee                                     | 273                   | (31.6)  | 209                                                                             | (32.8)  |
| Family reunion                                    | 133                   | (15.4)  | 100                                                                             | (15.7)  |
| Other                                             | 4                     | (0.5)   | 3                                                                               | (0.5)   |
| Total                                             | 864                   | (100.0) | 637                                                                             | (100.0) |
| <b>Arrived in Norway...</b>                       |                       |         |                                                                                 |         |
| ...alone                                          | 247                   | (28.1)  | 182                                                                             | (28.0)  |
| ...with friends, but no family                    | 56                    | (6.4)   | 43                                                                              | (6.6)   |
| ...with family                                    | 576                   | (65.5)  | 425                                                                             | (65.4)  |
| Total                                             | 879                   | (100.0) | 650                                                                             | (100.0) |
| <b>Family member previously settled in Norway</b> |                       |         |                                                                                 |         |
| No                                                | 594                   | (68.3)  | 440                                                                             | (68.4)  |
| Yes                                               | 276                   | (31.7)  | 203                                                                             | (31.6)  |
| Total                                             | 870                   | (100.0) | 643                                                                             | (100.0) |
| <b>Length of flight<sup>1</sup></b>               |                       |         |                                                                                 |         |
| Less than 3 months                                | 165                   | (33.7)  | 124                                                                             | (33.9)  |
| 3 to 12 months                                    | 61                    | (12.4)  | 42                                                                              | (11.5)  |
| 1 to 2 years                                      | 59                    | (12.0)  | 43                                                                              | (11.7)  |
| 2 to 3 years                                      | 77                    | (15.7)  | 56                                                                              | (15.3)  |
| More than 3 years                                 | 128                   | (26.1)  | 101                                                                             | (27.6)  |
| Total                                             | 490                   | (100.0) | 366                                                                             | (100.0) |
| <b>Residency time in Norway<sup>2</sup></b>       |                       |         |                                                                                 |         |
| Less than 2 years                                 | 104                   | (16.8)  | 83                                                                              | (17.9)  |
| Between 2 and 3 years                             | 151                   | (24.4)  | 120                                                                             | (25.9)  |
| Between 3 and 4 years                             | 289                   | (46.7)  | 209                                                                             | (45.1)  |
| More than 4 years                                 | 75                    | (12.1)  | 51                                                                              | (11.0)  |
| Total                                             | 619                   | (100.0) | 463                                                                             | (100.0) |

<sup>1</sup> Estimated through the number of days elapsed between a refugee reportedly left Syria and arrived in Norway

<sup>2</sup> Estimated through the number of days elapsed between a refugee reportedly arrived in Norway and the date he/she returned the questionnaire

Table 4. Potentially traumatic experiences prior to and during the flight from Syria among participants

|                                                                                                                           |     | Participants<br>N = 902 <sup>1</sup> |        | Participants willing<br>to take part in<br>longitudinal survey<br>N = 665 <sup>1</sup> |        |
|---------------------------------------------------------------------------------------------------------------------------|-----|--------------------------------------|--------|----------------------------------------------------------------------------------------|--------|
|                                                                                                                           |     | n                                    | (%)    | n                                                                                      | (%)    |
| <b>Before you left your home, have you personally faced any of the following situations or events:</b>                    |     |                                      |        |                                                                                        |        |
| War at close quarters                                                                                                     | No  | 41                                   | (4.7)  | 31                                                                                     | (4.8)  |
|                                                                                                                           | Yes | 840                                  | (95.3) | 618                                                                                    | (95.2) |
| Forced separation from family or close friends                                                                            | No  | 324                                  | (40.3) | 235                                                                                    | (39.8) |
|                                                                                                                           | Yes | 480                                  | (59.7) | 355                                                                                    | (60.2) |
| Loss or disappearance of family member(s) or loved one(s)                                                                 | No  | 287                                  | (35.3) | 213                                                                                    | (35.5) |
|                                                                                                                           | Yes | 526                                  | (64.7) | 387                                                                                    | (64.5) |
| Physical violence or assault                                                                                              | No  | 554                                  | (70.5) | 400                                                                                    | (69.3) |
|                                                                                                                           | Yes | 232                                  | (29.5) | 177                                                                                    | (30.7) |
| Witnessing physical violence or assault                                                                                   | No  | 304                                  | (36.9) | 203                                                                                    | (33.5) |
|                                                                                                                           | Yes | 520                                  | (63.1) | 403                                                                                    | (66.5) |
| Torture                                                                                                                   | No  | 567                                  | (72.8) | 410                                                                                    | (71.6) |
|                                                                                                                           | Yes | 212                                  | (27.2) | 163                                                                                    | (28.4) |
| Sexual violence                                                                                                           | No  | 710                                  | (93.3) | 518                                                                                    | (92.7) |
|                                                                                                                           | Yes | 51                                   | (6.7)  | 41                                                                                     | (7.3)  |
| Other frightening situation(s) where you felt your life was in danger                                                     | No  | 103                                  | (12.0) | 74                                                                                     | (11.7) |
|                                                                                                                           | Yes | 754                                  | (88.0) | 561                                                                                    | (88.3) |
| <b>After you left your home, during your flight, have you personally faced any of the following situations or events:</b> |     |                                      |        |                                                                                        |        |
| War at close quarters                                                                                                     | No  | 408                                  | (49.3) | 310                                                                                    | (50.7) |
|                                                                                                                           | Yes | 420                                  | (50.7) | 302                                                                                    | (49.3) |
| Forced separation from family or close friends                                                                            | No  | 412                                  | (52.5) | 298                                                                                    | (51.5) |
|                                                                                                                           | Yes | 373                                  | (47.5) | 281                                                                                    | (48.5) |
| Loss or disappearance of family member(s) or loved one(s)                                                                 | No  | 422                                  | (53.8) | 312                                                                                    | (53.6) |
|                                                                                                                           | Yes | 362                                  | (46.2) | 270                                                                                    | (46.4) |
| Physical violence or assault                                                                                              | No  | 638                                  | (83.6) | 467                                                                                    | (83.5) |
|                                                                                                                           | Yes | 125                                  | (16.4) | 92                                                                                     | (16.5) |
| Witnessing physical violence or assault                                                                                   | No  | 566                                  | (72.6) | 405                                                                                    | (70.7) |
|                                                                                                                           | Yes | 214                                  | (27.4) | 168                                                                                    | (29.3) |
| Torture                                                                                                                   | No  | 657                                  | (86.8) | 481                                                                                    | (87.1) |
|                                                                                                                           | Yes | 100                                  | (13.2) | 71                                                                                     | (12.9) |
| Sexual violence                                                                                                           | No  | 722                                  | (97.3) | 529                                                                                    | (97.2) |
|                                                                                                                           | Yes | 20                                   | (2.7)  | 15                                                                                     | (2.8)  |
| Other frightening situation(s) where you felt your life was in danger                                                     | No  | 350                                  | (42.8) | 258                                                                                    | (42.9) |
|                                                                                                                           | Yes | 468                                  | (57.2) | 344                                                                                    | (57.1) |

<sup>1</sup> Not all participants answered all items, therefore, the total number of answers for a given item may be less than 902 and 665 for the two groups, respectively.

## Registry data

As part of the consent procedure, the cover letter explained that participation in the study entailed that questionnaire data would be linked to registry data in the following Norwegian registries: National education database, NUDB (provides education statistics on an individual level from 1970 up until the present); employment and sick-leave databases (contain individual level data on work-participation and doctor-certified sickness absence from work); Norwegian Prescription Database, NorPD (contains individual level data on all prescription drugs dispensed by pharmacies in Norway); the KUHR database (contains individual level data on the utilization of primary health care services in Norway - e.g. primary care doctors and physiotherapists); and the Norwegian Patient Registry, NPR (contains individual level data on the utilization of specialized health care in Norway).

## Patient and public involvement

The REFUGE-study was supported throughout the development process by members of the community. Focus groups were held in the early stages of development in order to tailor the questionnaire, and a user reference group was created in order to act as an advisory group, providing insight during the planning, development and implementation stages. Community members were also involved in the recruitment process, providing insight and advice on the dissemination of information about the study through social media.

## Findings to date

The first wave of data collection in Norway has been completed. At the time of writing, no findings have been published.

## Strengths and limitations

The REFUGE-study has several important strengths, both in terms of methodology, and in value of the resulting data. Firstly, the study population was randomly selected from a large source population consisting of all adult refugees from Syria residing in Norway who met the study's eligibility criteria, obtained from the Norwegian National Registry. In comparison, many of the previous studies on mental health in refugee populations rely on convenience sampling. Further, the use of a three-wave longitudinal survey design will allow for better exploration of cause-effect relationships between variables in the study, than purely cross-sectional data. In addition, research on the association between refugee mental health and



1  
2  
3 integration is scarce. By linking longitudinal questionnaire data to registry data on education-,  
4 work- and health-related parameters, the study could make important contributions to the  
5 dearth of evidence on this topic. Also, combining self-report data with registry data from  
6 well-established national registries may reduce common method bias. Research on refugee  
7 mental health to date relies heavily on self-report data. A further strength of the study is that  
8 most of the key variables are measured using well-documented and validated scales. Review  
9 articles on refugee mental health frequently highlight the large degree of variance in terms of  
10 methods used, and call for increased focus on methodological issues. Lastly, the close  
11 collaboration between the REFUGE-study group in Norway and its main collaborating  
12 partner, the Red Cross University College in Sweden, will offer ample opportunities to  
13 compare Syrian refugee populations in two different countries, as both projects use similar  
14 measures and have agreed to collaborate on and combine datasets.  
15  
16  
17  
18  
19  
20  
21  
22  
23

24 An important potential weakness of REFUGE-I is that less than 11 percent of the sampled  
25 population participated in the study. This could lead to selection bias problems. As can be  
26 seen from Table 1, participants are very similar to the source and sample population in terms  
27 of gender, though the proportion of young and unmarried refugees are notably smaller in the  
28 participating group. Table S2 in the supplementary material shows that the geographical  
29 distribution across Norway's 18 counties was very similar for participants and the sample  
30 population. In terms of residency status, participants had the same proportional breakdown as  
31 the sample population: 95% had temporary residency in Norway at the time of the survey and  
32 5% had permanent residency (result not shown in tables). In order to further explore selection  
33 bias, we investigated whether there were any trends across demographic and background  
34 variables in terms of when the surveys were filled out and returned. Given that the survey was  
35 open for nine months, exploring the timing of participation may give some indication of  
36 different groups' willingness to participate, and, by extension, suggest which groups may be  
37 over- and underrepresented among participants.  
38  
39  
40  
41  
42  
43  
44  
45  
46  
47  
48  
49

50 Table S3 in the supplementary material shows the distribution of demographic variables  
51 across 4 different time-periods of participation (i.e. the 9-month period the survey was open  
52 was divided into 4 shorter periods), and Table S4 shows the distribution across background  
53 characteristics related to refugee status and history. Differences in distributions across  
54 time-periods were tested with chi-square test of equal proportion. As can be seen from the  
55 tables, there was weak or no evidence that the timing of participation was related to  
56  
57  
58  
59  
60

1  
2  
3 demographic and/or background variables with three exceptions. First, there was very clear  
4 evidence that residency time in Norway was negatively associated with early participation -  
5 i.e. the longer a refugee's residency time in Norway, the less likely (s)he was to participate in  
6 the first time-periods following study launch ( $p < 0.001$ ), relatively speaking. There was also  
7 very strong statistical evidence ( $p < 0.001$ ) that pre-migratory stress was associated with the  
8 timing of participation, though the underlying trend was not easily interpretable. Refugees  
9 with the highest number of potentially traumatic pre-flight experiences (PTEs) were more  
10 likely to participate in the early periods after study launch (relatively speaking). This was not  
11 true, however, for the refugee group with the second to most PTEs. Lastly, there was  
12 moderate evidence that refugee status upon arrival was association with the timing of  
13 participation ( $p = 0.01$ ), though no clear underlying pattern was evident.

14  
15 Another limitation of the present study is the survey design used to attain prevalences of  
16 depression, anxiety and PTSD symptoms. Short-form questionnaires, while efficient, do not  
17 capture all aspects of the measured constructs. Additionally, recent studies have suggested  
18 that when self-report measures are used, resulting prevalences tend to be higher than when  
19 using diagnostic interviews[14,15]. However, the questionnaires used in the current study to  
20 measure PTSD, anxiety and depression have been validated for use within the studied  
21 population and their use allows for many more participants to be reached, improving the  
22 generalizability of the findings.

23  
24 Perhaps the most significant learning opportunity provided by the present study thus far has  
25 been the challenging recruitment process. Although extensive recruitment efforts were  
26 employed, the participation rate for REFUGE-I was just above 10%. As noted previously,  
27 methods to boost recruitment involved the utilisation of contacts within the community,  
28 dedicated Facebook and web pages in Arabic, and Q&A sessions held at Adult Education  
29 centres in Norway's major cities, as well as the dissemination of information about the project  
30 online through purpose-built, animated videos and newsletters. Researchers aiming to gather  
31 data from similar populations would do well to ensure that sufficient time and resources are  
32 dedicated to the recruitment phase of the study.

### 33 34 35 36 37 38 39 40 41 42 43 44 45 46 47 48 49 50 51 52 53 54 55 56 57 58 59 60

**Future plans**

The REFUGE-cohort study will conduct a second wave of data collection in 2020. A third wave of data collection is planned in 2021, pending funding. Furthermore, we plan to link questionnaire data to Norwegian registry data after all three waves of data collection have

1  
2  
3 been completed. Registry data will be obtained for time-periods both prior to and after the  
4 three-wave survey. Primary and secondary objectives with detailed plans for analyses for  
5 studies involving registry data will be registered at ClinicalTrials.gov prior to obtaining the  
6 registry data, so that true hypothesis-testing studies from the REFUGE-cohort are  
7 distinguishable from more exploratory and data-driven studies. Finally, pending ethics  
8 approval, we will begin the process of merging the Norwegian REFUGE-cohort with existing  
9 datasets in Sweden, creating the REFUGE-database.  
10  
11  
12  
13  
14  
15  
16

17 Parallel to completing the survey data collection, data-merging and registry data obtainment,  
18 we aim to publish papers in accordance with our pre-registered publication plan at  
19 ClinicalTrials.gov.  
20  
21  
22  
23  
24

## 25 **COLLABORATION**

26 We welcome potential collaboration with other research groups. Interested researchers should  
27 contact the REFUGE research group for collaboration and knowledge-sharing. Locally  
28 collected data can then be added to the REFUGE-database. Reference estimates (e.g.  
29 prevalence, incidence and associations) can then be continuously updated and made available  
30 to researchers abiding by the EU's GDPR laws and regulations. In addition, the REFUGE-  
31 database will also include data obtained through Scandinavian social and health-registries.  
32  
33  
34  
35  
36  
37

38 **Acknowledgements:** The authors would especially like to thank all participating refugees and  
39 asylum-seekers for taking part in both the main study and preparatory stages of the project.  
40 The authors would also like to thank the reference group for their valuable comments and  
41 suggestions along the way. Finally, we would like to give special thanks to our trusted Arabic  
42 interpreter/translator for excellent work throughout the project period.  
43  
44  
45  
46  
47

48 **Contributors:** AN, PC, FS, AA and ØS contributed to the conception of this article. AN, PC,  
49 FS, AA and ØS were involved in manuscript writing and revision. AN and ØS were involved  
50 in data analysis and data presentation. All authors read, contributed substantially to and  
51 approved the final manuscript.  
52  
53  
54  
55

56 **Competing Interests:** None declared.  
57  
58  
59  
60

1  
2  
3 **Funding:** The REFUGE-study was initiated by researchers at the Norwegian Centre for  
4 Violence and Traumatic Stress Studies (NKVTS). No external funding was received.  
5  
6  
7

### 8 **Licence Statement**

9  
10 I, the Submitting Author has the right to grant and does grant on behalf of all authors of the  
11 Work (as defined in the below author licence), an exclusive licence and/or a non-exclusive  
12 licence for contributions from authors who are: i) UK Crown employees; ii) where BMJ has  
13 agreed a CC-BY licence shall apply, and/or iii) in accordance with the terms applicable for  
14 US Federal Government officers or employees acting as part of their official duties; on a  
15 worldwide, perpetual, irrevocable, royalty-free basis to BMJ Publishing Group Ltd (“BMJ”)  
16 its licensees and where the relevant Journal is co-owned by BMJ to the co-owners of the  
17 Journal, to publish the Work in BMJ Open and any other BMJ products and to exploit all  
18 rights, as set out in our licence.  
19  
20  
21  
22  
23  
24  
25  
26

27 The Submitting Author accepts and understands that any supply made under these terms is  
28 made by BMJ to the Submitting Author unless you are acting as an employee on behalf of  
29 your employer or a postgraduate student of an affiliated institution which is paying any  
30 applicable article publishing charge (“APC”) for Open Access articles. Where the Submitting  
31 Author wishes to make the Work available on an Open Access basis (and intends to pay the  
32 relevant APC), the terms of reuse of such Open Access shall be governed by a Creative  
33 Commons licence – details of these licences and which Creative Commons licence will apply  
34 to this Work are set out in our licence referred to above.  
35  
36  
37  
38  
39  
40  
41  
42  
43  
44  
45  
46  
47  
48  
49  
50  
51  
52  
53  
54  
55  
56  
57  
58  
59  
60

## REFERENCES

- 1 Steel Z, Chey T, Silove D, *et al.* Association of torture and other potentially traumatic events with mental health outcomes among populations exposed to mass conflict and displacement: a systematic review and meta-analysis. *JAMA* 2009;**302**:537–49.
- 2 Marshall GN, Schell TL, Elliott MN, *et al.* Mental health of Cambodian refugees 2 decades after resettlement in the United States. *JAMA* 2005;**294**:571–9.
- 3 Priebe S. *Public Health Aspects of Mental Health Among Migrants and Refugees: A Review of the Evidence on Mental Health Care for Refugees, Asylum Seekers and Irregular Migrants in the WHO European Region.* World Health Organization 2016.
- 4 American Psychiatric Association. *Diagnostic and statistical manual of mental disorders, (5th ed.)*. Washington, DC: Author 2013.
- 5 WHO | International Classification of Diseases, 11th Revision (ICD-11). Published Online First: 11 October 2019. <https://www.who.int/classifications/icd/en/> (accessed 5 Nov 2019).
- 6 de Vroome T, van Tubergen F. The Employment Experience of Refugees in the Netherlands. *Int Migr Rev* 2010;**44**:376–403.
- 7 Schick M, Zumwald A, Knöpfli B, *et al.* Challenging future, challenging past: the relationship of social integration and psychological impairment in traumatized refugees. *Eur J Psychotraumatol* 2016;**7**:28057.
- 8 Bakker L, Dagevos J, Engbersen G. The Importance of Resources and Security in the Socio-Economic Integration of Refugees. A Study on the Impact of Length of Stay in Asylum Accommodation and Residence Status on Socio-Economic Integration for the Four Largest Refugee Groups in the Netherlands. *Journal of International Migration and Integration* 2014;**15**:431–48.
- 9 Global Trends - Forced Displacement in 2018 - UNHCR. UNHCR Global Trends 2018. <https://www.unhcr.org/globaltrends2018/> (accessed 26 Oct 2019).
- 10 Where Syrian refugees have resettled worldwide. Pew Research Center. <https://www.pewresearch.org/fact-tank/2018/01/29/where-displaced-syrians-have-resettled/> (accessed 26 Oct 2019).
- 11 Mollica RF, Wyshak G, de Marneffe D, *et al.* Indochinese versions of the Hopkins Symptom Checklist-25: a screening instrument for the psychiatric care of refugees. *Am J Psychiatry* 1987;**144**:497–500.
- 12 Shoeb M, Weinstein H, Mollica R. The Harvard trauma questionnaire: adapting a cross-cultural instrument for measuring torture, trauma and posttraumatic stress disorder in Iraqi refugees. *Int J Soc Psychiatry* 2007;**53**:447–63.
- 13 Lavik NJ, Hauff E, Solberg Ø, *et al.* The use of self-reports in psychiatric studies of traumatized refugees: Validation and analysis of HSCL-25. *Nord J Psychiatry* 1999;**53**:17–20.

- 1  
2  
3 14 Thombs BD, Kwakkenbos L, Levis AW, *et al.* Addressing overestimation of the  
4 prevalence of depression based on self-report screening questionnaires. *Canadian*  
5 *Medical Association Journal*. 2018;**190**:E44–9. doi:10.1503/cmaj.170691  
6  
7  
8 15 Hoffman YSG, Diamond GM, Lipsitz JD. The challenge of estimating PTSD prevalence  
9 in the context of ongoing trauma: the example of Israel during the Second Intifada. *J*  
10 *Anxiety Disord* 2011;**25**:788–93.  
11  
12  
13  
14  
15  
16  
17  
18  
19  
20  
21  
22  
23  
24  
25  
26  
27  
28  
29  
30  
31  
32  
33  
34  
35  
36  
37  
38  
39  
40  
41  
42  
43  
44  
45  
46  
47  
48  
49  
50  
51  
52  
53  
54  
55  
56  
57  
58  
59  
60

For peer review only

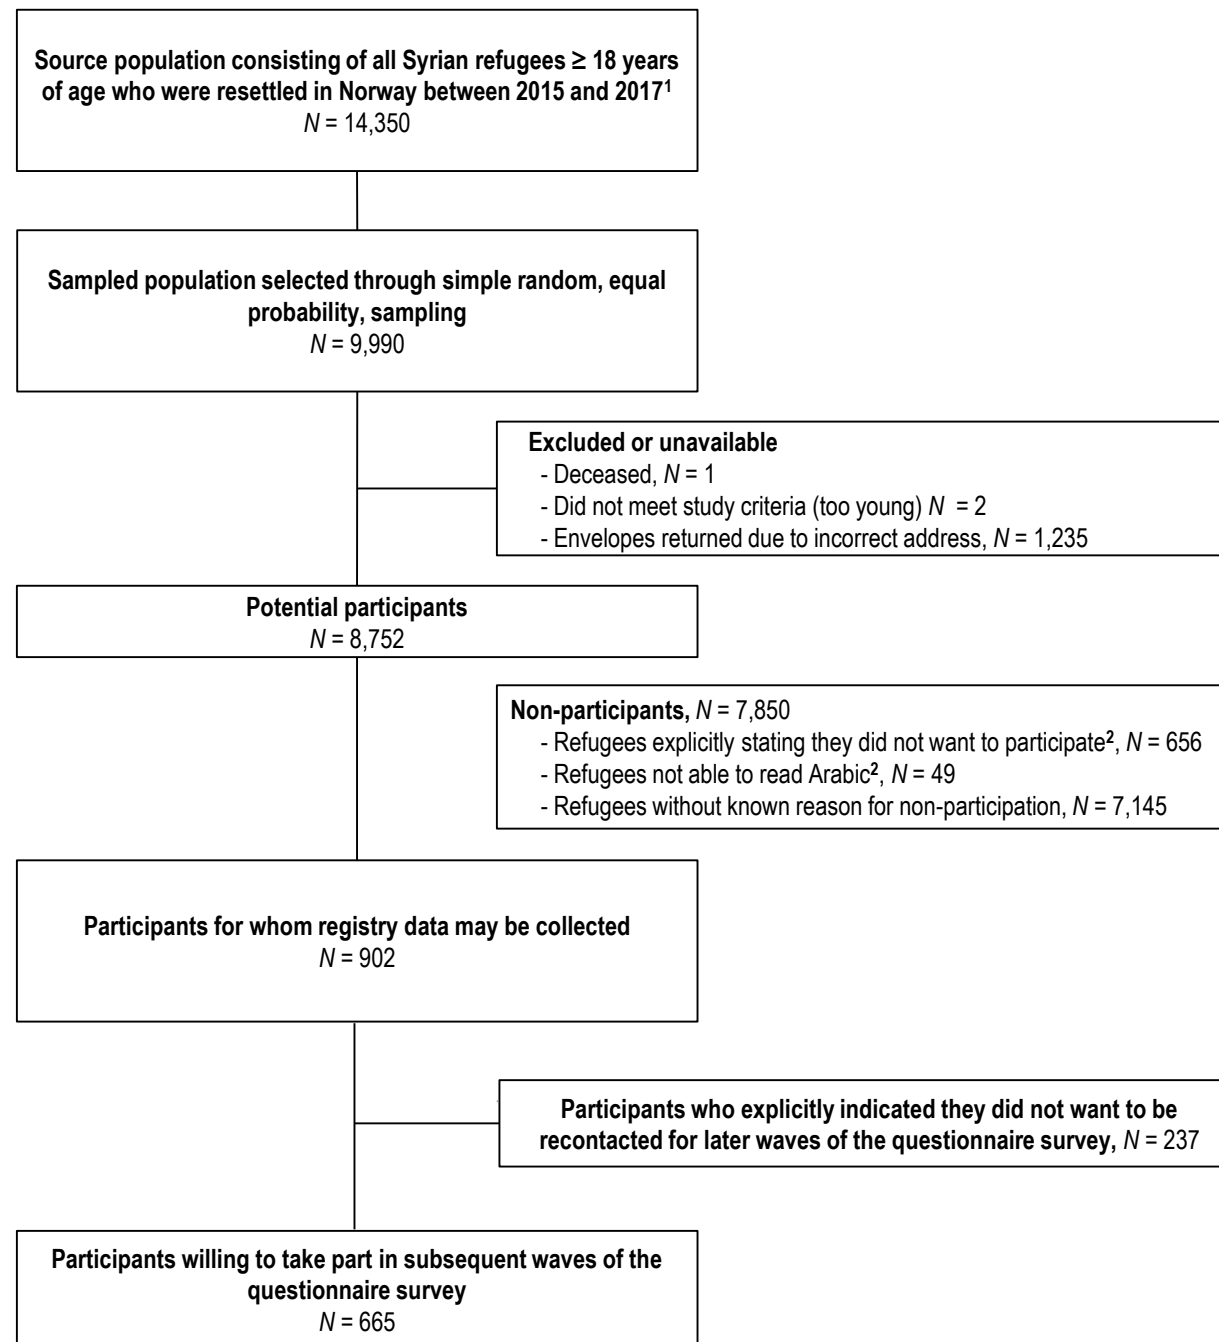

<sup>1</sup> Refugees were either resettlement/quota refugees; asylum seekers who were granted asylum in Norway; or individuals coming through the program *Family immigration with a person who has protection (asylum) in Norway*. The source population was identified through the Norwegian National Registry (NNR)

<sup>2</sup> Information was obtained when non-responders were contacted during the telephone reminder

Table S1. Responses given by initial non-responders during telephone reminder sessions (*N* = 2,087)

|                                                                 | <i>N</i>     | (%)            |
|-----------------------------------------------------------------|--------------|----------------|
| <b>Answers given by refugees</b>                                |              |                |
| Would like to participate and does not need a new questionnaire | 403          | (19.1)         |
| Would like to participate and needs a new questionnaire         | 856          | (40.8)         |
| Does not want to participate                                    | 656          | (30.8)         |
| Moved and wants a new questionnaire                             | 69           | (3.3)          |
| Moved and does not want a new questionnaire                     | 29           | (1.4)          |
| Wrong number/person                                             | 25           | (1.2)          |
| Does not understand Arabic                                      | 49           | (2.4)          |
| <b>Total</b>                                                    | <b>2,087</b> | <b>(100.0)</b> |



Table S2. Geographical distribution across Norway's 18 counties for participants and sample population of refugees from Syria

|                  | Sample population<br>N = 9,990 |         | Participants<br>N = 902 |         |
|------------------|--------------------------------|---------|-------------------------|---------|
|                  | n                              | (%)     | n                       | (%)     |
| Akershus         | 703                            | (7.0)   | 52                      | (5.7)   |
| Aust-Agder       | 347                            | (3.5)   | 30                      | (3.3)   |
| Buskerud         | 470                            | (4.7)   | 39                      | (4.3)   |
| Finnmark         | 254                            | (2.5)   | 23                      | (2.6)   |
| Hedmark          | 311                            | (3.1)   | 30                      | (3.3)   |
| Hordaland        | 1,009                          | (10.1)  | 88                      | (9.8)   |
| Møre og Romsdal  | 486                            | (4.9)   | 51                      | (5.7)   |
| Nordland         | 670                            | (6.7)   | 65                      | (7.2)   |
| Oppland          | 381                            | (3.8)   | 37                      | (4.1)   |
| Oslo             | 773                            | (7.7)   | 70                      | (7.9)   |
| Rogaland         | 831                            | (8.3)   | 63                      | (7.0)   |
| Sogn og Fjordane | 380                            | (3.8)   | 34                      | (3.8)   |
| Telemark         | 398                            | (4.0)   | 40                      | (4.4)   |
| Troms            | 449                            | (4.5)   | 51                      | (5.7)   |
| Trøndelag        | 1,049                          | (10.5)  | 96                      | (10.5)  |
| Vest-Agder       | 520                            | (5.2)   | 50                      | (5.5)   |
| Vestfold         | 475                            | (4.8)   | 44                      | (4.9)   |
| Østfold          | 484                            | (4.9)   | 39                      | (4.3)   |
| Total            | 9,990                          | (100.0) | 902                     | (100.0) |

Table S3. Demographic characteristics of participating refugees from Syria according to *when* they returned the questionnaire

|                     | 4 <sup>th</sup> quarter<br>2018 |         | 1 <sup>st</sup> quarter<br>2019 |         | 2 <sup>nd</sup> quarter<br>2019 |         | 3 <sup>rd</sup> quarter<br>2019 |         | Total    |         | Chi-<br>square |
|---------------------|---------------------------------|---------|---------------------------------|---------|---------------------------------|---------|---------------------------------|---------|----------|---------|----------------|
|                     | <i>n</i>                        | (%)     | <i>n</i>                        | (%)     | <i>n</i>                        | (%)     | <i>n</i>                        | (%)     | <i>n</i> | (%)     |                |
| <b>Gender</b>       |                                 |         |                                 |         |                                 |         |                                 |         |          |         | 0.08           |
| Male                | 278                             | (64.2)  | 66                              | (69.5)  | 157                             | (68.0)  | 77                              | (55.8)  | 578      | (64.4)  |                |
| Female              | 155                             | (35.8)  | 29                              | (30.5)  | 74                              | (32.0)  | 61                              | (44.2)  | 319      | (35.6)  |                |
| Total               | 433                             | (100.0) | 95                              | (100.0) | 231                             | (100.0) | 138                             | (100.0) | 897      | (100.0) |                |
| <b>Age groups</b>   |                                 |         |                                 |         |                                 |         |                                 |         |          |         | 0.36           |
| 18-29               | 87                              | (20.1)  | 28                              | (29.5)  | 50                              | (21.6)  | 31                              | (22.5)  | 196      | (21.9)  |                |
| 30-39               | 142                             | (32.8)  | 28                              | (29.5)  | 88                              | (38.1)  | 50                              | (36.2)  | 308      | (34.3)  |                |
| 40-49               | 122                             | (28.2)  | 19                              | (20.0)  | 52                              | (22.5)  | 36                              | (26.1)  | 229      | (25.5)  |                |
| 50-64               | 72                              | (16.6)  | 19                              | (20.0)  | 37                              | (16.1)  | 16                              | (11.6)  | 140      | (15.6)  |                |
| >64                 | 10                              | (2.3)   | 1                               | (1.0)   | 4                               | (1.7)   | 5                               | (3.6)   | 24       | (2.7)   |                |
| Total               | 433                             | (100.0) | 95                              | (100.0) | 231                             | (100.0) | 138                             | (100.0) | 897      | (100.0) |                |
| <b>Civil status</b> |                                 |         |                                 |         |                                 |         |                                 |         |          |         | 0.10           |
| Unmarried           | 121                             | (27.9)  | 31                              | (32.6)  | 60                              | (26.0)  | 22                              | (15.9)  | 234      | (26.1)  |                |
| Married             | 276                             | (63.7)  | 58                              | (61.1)  | 154                             | (66.7)  | 104                             | (75.4)  | 592      | (66.0)  |                |
| Other <sup>1</sup>  | 36                              | (8.3)   | 6                               | (6.3)   | 17                              | (7.4)   | 12                              | (8.7)   | 71       | (7.9)   |                |
| Total               | 433                             | (100.0) | 95                              | (100.0) | 231                             | (100.0) | 138                             | (100.0) | 897      | (100.0) |                |
| <b>Education</b>    |                                 |         |                                 |         |                                 |         |                                 |         |          |         | 0.53           |
| 9 years or less     | 187                             | (44.4)  | 38                              | (42.2)  | 111                             | (48.7)  | 53                              | (38.4)  | 389      | (44.4)  |                |
| 10-12 years         | 74                              | (17.6)  | 18                              | (20.0)  | 35                              | (15.4)  | 31                              | (22.5)  | 158      | (18.0)  |                |
| More than 12 years  | 160                             | (38.0)  | 34                              | (37.8)  | 82                              | (36.0)  | 54                              | (39.1)  | 330      | (37.6)  |                |
| Total               | 421                             | (100.0) | 90                              | (100.0) | 228                             | (100.0) | 138                             | (100.0) | 877      | (100.0) |                |

<sup>1</sup> Includes: divorced, widow(er), separated

Table S4. Refugee and migratory characteristics of participating refugees from Syria according to when they returned the questionnaire

|                                       | 4 <sup>th</sup> quarter<br>2018 |         | 1 <sup>st</sup> quarter<br>2019 |         | 2 <sup>nd</sup> quarter<br>2019 |         | 3 <sup>rd</sup> quarter<br>2019 |         | Total |         | Chi-<br>square |
|---------------------------------------|---------------------------------|---------|---------------------------------|---------|---------------------------------|---------|---------------------------------|---------|-------|---------|----------------|
|                                       | n                               | (%)     | n                               | (%)     | n                               | (%)     | n                               | (%)     | n     | (%)     |                |
| <b>Ref. status upon arrival</b>       |                                 |         |                                 |         |                                 |         |                                 |         |       |         | 0.01           |
| Asylum seeker                         | 208                             | (50.5)  | 54                              | (61.4)  | 122                             | (54.7)  | 66                              | (48.5)  | 450   | (52.4)  |                |
| Quota refugee                         | 147                             | (35.7)  | 20                              | (22.7)  | 70                              | (31.4)  | 35                              | (25.7)  | 272   | (31.7)  |                |
| Family reunion                        | 55                              | (13.3)  | 14                              | (15.9)  | 31                              | (13.9)  | 33                              | (24.3)  | 133   | (15.5)  |                |
| Other                                 | 2                               | (0.5)   | 0                               | (0.0)   | 0                               | (0.0)   | 2                               | (1.5)   | 4     | (0.5)   |                |
| Total                                 | 412                             | (100.0) | 88                              | (100.0) | 223                             | (100.0) | 136                             | (100.0) | 859   | (100.0) |                |
| <b>Arrived in Norway...</b>           |                                 |         |                                 |         |                                 |         |                                 |         |       |         | 0.47           |
| ...alone                              | 121                             | (28.8)  | 30                              | (32.6)  | 64                              | (28.1)  | 31                              | (23.0)  | 246   | (28.1)  |                |
| ...with friends only                  | 31                              | (7.4)   | 7                               | (7.6)   | 11                              | (4.8)   | 7                               | (5.2)   | 56    | (6.4)   |                |
| ...with family                        | 268                             | (63.8)  | 55                              | (59.8)  | 153                             | (67.1)  | 97                              | (71.9)  | 573   | (65.5)  |                |
| Total                                 | 420                             | (100.0) | 92                              | (100.0) | 228                             | (100.0) | 135                             | (100.0) | 875   | (100.0) |                |
| <b>Length of flight</b>               |                                 |         |                                 |         |                                 |         |                                 |         |       |         | 0.58           |
| Less than 3 months                    | 73                              | (31.2)  | 20                              | (39.2)  | 42                              | (33.6)  | 30                              | (37.5)  | 165   | (33.7)  |                |
| 3 to 12 months                        | 24                              | (10.3)  | 6                               | (11.8)  | 17                              | (13.6)  | 14                              | (17.5)  | 61    | (12.4)  |                |
| 1 to 2 years                          | 31                              | (13.2)  | 7                               | (13.7)  | 15                              | (12.0)  | 6                               | (7.5)   | 59    | (12.0)  |                |
| 2 to 3 years                          | 34                              | (14.5)  | 7                               | (13.7)  | 22                              | (17.6)  | 14                              | (17.5)  | 77    | (15.7)  |                |
| More than 3 years                     | 72                              | (30.8)  | 11                              | (21.6)  | 29                              | (23.2)  | 16                              | (20.0)  | 128   | (26.1)  |                |
| Total                                 | 234                             | (100.0) | 51                              | (100.0) | 125                             | (100.0) | 80                              | (100.0) | 490   | (100.0) |                |
| <b>Residency time in Norway</b>       |                                 |         |                                 |         |                                 |         |                                 |         |       |         | <0.001         |
| Less than 2 years                     | 69                              | (22.9)  | 12                              | (18.5)  | 16                              | (10.3)  | 7                               | (7.2)   | 104   | (16.8)  |                |
| 2-3 years                             | 73                              | (24.3)  | 14                              | (21.5)  | 38                              | (24.4)  | 26                              | (26.8)  | 151   | (24.4)  |                |
| 3-4 years                             | 140                             | (46.5)  | 32                              | (49.2)  | 76                              | (48.7)  | 41                              | (42.3)  | 289   | (46.7)  |                |
| More than 4 years                     | 19                              | (6.3)   | 7                               | (10.8)  | 26                              | (16.7)  | 23                              | (23.7)  | 75    | (12.1)  |                |
| Total                                 | 301                             | (100.0) | 65                              | (100.0) | 156                             | (100.0) | 97                              | (100.0) | 619   | (100.0) |                |
| <b>PTEs before flight<sup>1</sup></b> |                                 |         |                                 |         |                                 |         |                                 |         |       |         | <0.001         |
| 0-1                                   | 34                              | (7.9)   | 10                              | (10.6)  | 34                              | (14.8)  | 15                              | (11.3)  | 93    | (10.5)  |                |
| 2-3                                   | 101                             | (23.4)  | 25                              | (26.6)  | 86                              | (37.4)  | 29                              | (21.8)  | 241   | (27.1)  |                |
| 4-5                                   | 185                             | (42.9)  | 34                              | (36.2)  | 75                              | (32.6)  | 64                              | (48.1)  | 358   | (40.3)  |                |
| >5                                    | 111                             | (25.8)  | 25                              | (26.6)  | 35                              | (15.2)  | 25                              | (18.8)  | 196   | (22.1)  |                |
| Total                                 | 431                             | (100.0) | 94                              | (100.0) | 230                             | (100.0) | 133                             | (100.0) | 888   | (100.0) |                |
| <b>PTEs during flight<sup>1</sup></b> |                                 |         |                                 |         |                                 |         |                                 |         |       |         | 0.46           |
| 0-1                                   | 154                             | (36.8)  | 31                              | (34.1)  | 96                              | (42.7)  | 54                              | (41.9)  | 335   | (38.8)  |                |
| 2-3                                   | 143                             | (34.2)  | 32                              | (35.1)  | 71                              | (31.6)  | 33                              | (25.6)  | 279   | (32.3)  |                |
| 4-5                                   | 89                              | (21.3)  | 19                              | (20.9)  | 48                              | (21.3)  | 32                              | (24.8)  | 188   | (21.8)  |                |
| >5                                    | 32                              | (7.7)   | 9                               | (9.9)   | 10                              | (4.4)   | 10                              | (7.7)   | 61    | (7.1)   |                |
| Total                                 | 418                             | (100.0) | 91                              | (100.0) | 225                             | (100.0) | 129                             | (100.0) | 863   | (100.0) |                |

<sup>1</sup> All individuals with at least one answered item on the PTE-scale were given a sum-score for total PTEs before/during flight

# BMJ Open

## Cohort profile: Resettlement in Uprooted Groups Explored (REFUGE) – A longitudinal study of mental health and integration in adult refugees from Syria resettled in Norway between 2015 and 2017

|                                 |                                                                                                                                                                                                                                                                                                                                                                                                                                                                           |
|---------------------------------|---------------------------------------------------------------------------------------------------------------------------------------------------------------------------------------------------------------------------------------------------------------------------------------------------------------------------------------------------------------------------------------------------------------------------------------------------------------------------|
| Journal:                        | <i>BMJ Open</i>                                                                                                                                                                                                                                                                                                                                                                                                                                                           |
| Manuscript ID                   | bmjopen-2019-036101.R1                                                                                                                                                                                                                                                                                                                                                                                                                                                    |
| Article Type:                   | Cohort profile                                                                                                                                                                                                                                                                                                                                                                                                                                                            |
| Date Submitted by the Author:   | 03-Mar-2020                                                                                                                                                                                                                                                                                                                                                                                                                                                               |
| Complete List of Authors:       | Nissen, Alexander ; Norwegian Center for Violence and Traumatic Stress Studies<br>Cauley, Prue; Norwegian Center for Violence and Traumatic Stress Studies<br>Saboonchi, Fredrik; Red Cross University College, Department of Health Sciences; Karolinska Institute, Department of Clinical Neuroscience<br>Andersen, Arnfinn; Norwegian Center for Violence and Traumatic Stress Studies<br>Solberg, Øivind; Norwegian Center for Violence and Traumatic Stress Studies, |
| <b>Primary Subject Heading</b>: | Epidemiology                                                                                                                                                                                                                                                                                                                                                                                                                                                              |
| Secondary Subject Heading:      | Mental health, Public health                                                                                                                                                                                                                                                                                                                                                                                                                                              |
| Keywords:                       | MENTAL HEALTH, EPIDEMIOLOGY, PUBLIC HEALTH                                                                                                                                                                                                                                                                                                                                                                                                                                |
|                                 |                                                                                                                                                                                                                                                                                                                                                                                                                                                                           |

SCHOLARONE™  
Manuscripts



I, the Submitting Author has the right to grant and does grant on behalf of all authors of the Work (as defined in the below author licence), an exclusive licence and/or a non-exclusive licence for contributions from authors who are: i) UK Crown employees; ii) where BMJ has agreed a CC-BY licence shall apply, and/or iii) in accordance with the terms applicable for US Federal Government officers or employees acting as part of their official duties; on a worldwide, perpetual, irrevocable, royalty-free basis to BMJ Publishing Group Ltd ("BMJ") its licensees and where the relevant Journal is co-owned by BMJ to the co-owners of the Journal, to publish the Work in this journal and any other BMJ products and to exploit all rights, as set out in our [licence](#).

The Submitting Author accepts and understands that any supply made under these terms is made by BMJ to the Submitting Author unless you are acting as an employee on behalf of your employer or a postgraduate student of an affiliated institution which is paying any applicable article publishing charge ("APC") for Open Access articles. Where the Submitting Author wishes to make the Work available on an Open Access basis (and intends to pay the relevant APC), the terms of reuse of such Open Access shall be governed by a Creative Commons licence – details of these licences and which [Creative Commons](#) licence will apply to this Work are set out in our licence referred to above.

Other than as permitted in any relevant BMJ Author's Self Archiving Policies, I confirm this Work has not been accepted for publication elsewhere, is not being considered for publication elsewhere and does not duplicate material already published. I confirm all authors consent to publication of this Work and authorise the granting of this licence.

1  
2  
3 **Cohort profile: Resettlement in Uprooted Groups Explored (REFUGE) – A longitudinal**  
4 **study of mental health and integration in adult refugees from Syria resettled in Norway**  
5 **between 2015 and 2017**  
6  
7  
8  
9

10  
11 Alexander Nissen<sup>1</sup>, Prue Cauley<sup>1</sup>, Fredrik Saboonchi<sup>3,4</sup>, Arnfinn Andersen<sup>1</sup> &  
12 Øivind Solberg<sup>2</sup>  
13  
14

15  
16  
17  
18 1. Division for Forced Migration and Disaster research, Norwegian Centre for Violence and  
19 Traumatic Stress Studies, Oslo, Norway  
20

21  
22 2. Division for Implementation and Treatment Research, Norwegian Centre for Violence and  
23 Traumatic Stress Studies, Oslo, Norway  
24

25  
26 3. Department of Health Sciences, Red Cross University College, Stockholm, Sweden  
27

28  
29 4. Division of Insurance Medicine, Department of Clinical Neuroscience, Karolinska  
30 Institutet, Stockholm, Sweden  
31  
32

33  
34  
35  
36  
37  
38  
39  
40 Corresponding author:

41  
42 M.D., M.Sc. Alexander Nissen

43  
44 P.box 181 Nydalen, 0409 Oslo, Norway

45  
46 Email: a.f.w.nissen@nkvts.no

47  
48 Phone: +47 91623650  
49  
50  
51  
52  
53

54 **KEYWORDS:** Refugees; cohort; Syria; mental health; integration  
55

56 **WORD COUNT** (excluding title page, abstract, references, tables and figures): 4454  
57  
58  
59  
60

## ABSTRACT

**Purpose:** In the field of forced migration and mental health research, longitudinal studies with large sample sizes and rigorous methodology are lacking. Therefore, the REFUGE-study was initiated in order to enhance current knowledge on mental health and quality of life among adult refugees from Syria resettled in Norway. The main aim of the study is to investigate how mental health may affect integration in the years following resettlement. This aim will be pursued by combining data from a longitudinal, three-wave questionnaire survey with data from population-based registries on education; work participation and sick-leave; health-care utilization; and drug prescription. The goal is to incorporate the data in an internationally shared database, the REFUGE-database, where collaborating researchers may access and use data from the study as well as deposit data from similar studies.

**Participants:** The first wave of the REFUGE-study (REFUGE-I) was launched in November 2018 and completed in September 2019. Of the initial 9,990 sampled individuals, 8,752 were reached either by post or telephone and 902 responded (response rate = 10.3%). The data gathered includes extensive sociodemographic information, pre-, peri- and post-migratory stress variables, and measures of mental health and quality of life. The data also features measures of sleep difficulties, smoking, alcohol and drug use, and self-reported physical health (e.g. head and neck pain).

**Findings to date:** To date, no findings have been published.

**Future plans:** The REFUGE-cohort study will conduct two additional data collections (2020 and 2021). Furthermore, questionnaire data will be linked to population-based registries after all three waves of data collection have been completed. Registry data will be obtained for time-periods both prior to and after the period of data collection. Finally, pending ethics approval, we will begin the process of merging the Norwegian REFUGE-cohort with existing datasets in Sweden, establishing the extended REFUGE-database.

### Strengths and Limitations

- The study features a large sample of both male and female adult refugees from Syria who were resettled in a high-income country between 2015 and 2017.
- Study participants were selected through random sampling from a population-based source population identified using Norway's National Registry – i.e. all refugees from Syria residing in Norway who met inclusion criteria had equal probability of selection.
- The study will use a three-wave survey design which will enable longitudinal tracking of self-reported mental health and other key measures
- The study will link data from the three-wave, questionnaire survey to data in Norway's large, population-based registries on education, work participation and sick-leave, health-care utilization and drug prescription; as well as to other datasets/data sources within the EU.
- Initial data collection yielded a low response rate, despite extensive recruitment efforts.



## INTRODUCTION

The adversities of forced migration make the current population of more than 70 million forcibly displaced people especially vulnerable[1]. Here, the concept of “vulnerability” refers to refugees’ heightened exposure to potentially traumatic events (PTEs) such as torture, war and/or violence-related traumas prior to or during forced migration, as well as experiences of post-migration socioeconomic hardships and social isolation. Together, these risk factors create a vulnerability that constitutes a profound risk for mental ill health and reduced quality of life with potential long-lasting effects[2–4].

Given the aforementioned high burden of mental ill health in refugee populations and the centrality of *functional impairment* in the diagnostic frameworks for PTSD, anxiety and depression in the main diagnostic manuals[5,6], few studies have looked at integration in relation to mental health within refugee populations. The studies available show that general health problems, as well as symptoms of PTSD and depression, are adversely associated with economic and social integration[7,8], with one study finding mental health to be a mediator between post-migration stressors and integration[9]. Still, longitudinal studies with large sample sizes and rigorous methodology are lacking and the socio-political controversy that is linked to the topic of refugee health often influences the measures and investigative methods used[10]. Therefore, studies that bridge these gaps are warranted in order to better understand the resettlement stressors and the mental health burden of refugees resettled in a host country in order to inform policy and practice.

Accordingly, the REFUGE-study was initiated in order to enhance current knowledge on mental health and quality of life among adult refugees from Syria resettled in Norway following the 2011 outbreak of the civil war in Syria. The main objective is to investigate how mental health may affect integration in the years following resettlement. This will be done through a planned longitudinal, three-wave survey design linked to population-based registries in Norway on education; work participation and sick-leave; health-care utilization; and drug prescription.

A broader, secondary aim is to extend the REFUGE-study beyond Norway’s borders, through collaboration between the REFUGE-study group in Norway and partner institutions in Sweden and the United Kingdom, forming the REFUGE-consortium. This work, pending ethics approval, will include setting up and servicing a shared database in order to harness the

1  
2  
3 research potential that lies within the existing datasets on resettled refugees from Syria in  
4 Norway and Sweden ( $N > 4,500$ ).

5  
6  
7 A tertiary, long-term goal is to further expand the REFUGE-database by encouraging  
8 researchers in other countries to complete similar, nation-wide data-collections that can be  
9 added to the existing database. In turn, given the extensive number of included participants,  
10 the REFUGE-database will have ample opportunities to provide unique cross-country,  
11 intersectional, comparative analyses that can provide robust explanatory models of refugees'  
12 health and social outcomes, in turn informing social policy and practice.  
13  
14  
15  
16  
17

18 At the time of writing this cohort profile, the first wave of the three-wave survey design has  
19 been completed. The REFUGE-study is registered in the ClinicalTrials.gov database  
20 (NCT03742128).  
21  
22  
23  
24  
25  
26  
27

## 28 **COHORT DESCRIPTION**

### 29 **Setting**

30 The study is set in Norway, a high-income country, with a population of 5.3 million  
31 people[11]. Approximately 4.5% of the Norwegian population has a refugee  
32 background[12]. The Directorate of Immigration (UDI) is the central agency in the Norwegian  
33 immigration administration. UDI facilitates lawful immigration and administrates applications  
34 for residency and citizenship, including asylum applications[for details, please see 13]. Since  
35 its onset in 2011, the civil war in Syria has forced more than 6.5 million Syrian citizens to flee  
36 the country as refugees, of which an estimated one million have reached Europe, excluding  
37 Turkey[14,15]. At the time of primary data collection, forced migrants from Syria therefore  
38 constituted the largest group of newly resettled refugees and asylum-seekers in Norway.  
39  
40  
41  
42  
43  
44  
45  
46  
47

### 48 **Eligibility**

49 The source population for the REFUGE-study cohort was defined by the following three  
50 criteria: Potential participants had to be (1) Syrian citizens who arrived in Norway as either a  
51 resettlement refugee (quota refugee), an asylum seeker, or through Norway's family reunion  
52 program, (2) granted permanent or temporary residency and registered with an address in  
53 Norway between January 1, 2015 and December 31, 2017, and finally, (3) 18 years of age or  
54 older at the time the sample was drawn from the source population.  
55  
56  
57  
58  
59  
60

1  
2  
3 These criteria were sent to the Norwegian National Registry (NNR) who generated a list of  
4 potential participants (N = 14,350) from their database consisting of all individuals residing in  
5 Norway at that time. A simple, random, equal probability sample of 9,990 Syrian citizens was  
6 then drawn in August, 2018.  
7  
8  
9

### 10 11 **Study preparation and promotion**

12 In initial stages of development, approximately a year before the commencement of the data  
13 collection, an early version of the questionnaire was tested in a reception centre. Arabic  
14 speaking asylum seekers filled out the survey and participated in focus groups with the aim of  
15 testing and tailoring the questionnaire for length, comprehension and cultural sensitivity.  
16 Several amendments to the questionnaire then followed as a result of the feedback obtained in  
17 these focus groups. Findings from this preliminary stage also prompted the creation of a user  
18 reference-group, consisting of six Syrians living in Norway. This user reference-group served  
19 as an advisory board throughout the planning, development and implementation of the study.  
20  
21  
22  
23  
24  
25  
26  
27  
28

29 Additionally, prior to data collection, a number of strategies were employed in order to inform  
30 potential participants about the study and boost participation. Key persons within the  
31 community were identified and contacted in order to discuss ways to explain and promote the  
32 study through social media and other channels. Based on input from these sources, several  
33 short, animated movies were made in Arabic in order to explain why the study was being  
34 undertaken, what participation entailed, and how key issues in research, such as informed  
35 consent, confidentiality, data handling, and privacy rights, would be handled. REFUGE web  
36 and Facebook pages were also created in both Arabic and Norwegian, conveying the same  
37 information as the movies, in more detail. The Facebook page, with Q&A, was continuously  
38 supervised and moderated by a native Arabic speaker.  
39  
40  
41  
42  
43  
44  
45  
46  
47

48 In order to reach a wider range of potential participants, in-person and paper-based  
49 dissemination of information also took place. Information and Q&A sessions at Adult  
50 Education centers (VOs) in Norway's larger cities were held by the REFUGE team members,  
51 including an Arabic interpreter from Syria who was involved in the study from the beginning.  
52 Information about the study was also sent to local community refugee centers throughout  
53 Norway. These centers work with refugees on a daily basis, assisting and counselling them on  
54 various matters related to the integration process into Norway.  
55  
56  
57  
58  
59  
60

## Sampling

The first wave of the REFUGE-study (REFUGE-I) was launched at the end of November 2018. Each of the 9,990 sampled Syrian refugees were sent an envelope containing the study questionnaire, a cover letter in Arabic and a prepaid return envelope. The cover letter explained the purpose and voluntary nature of the study, what participation entailed, and issues surrounding confidentiality and data handling. It also included a space for willing participants to provide written informed consent in the form of a signature. Moreover, due to the sensitive nature of some parts of the questionnaire, the cover letter explicitly stated that *“some questions in the questionnaire might be difficult to answer, cause slight discomfort or might bring up difficult memories from your past or flight to Norway”*. It also included contact details to clinical back-up in the form of a psychiatrist at NKVTS, stating that participants could contact this person in order to receive information and support in accessing professional medical help in Norway. Out of hours and emergency service contact details were also included.

The address list provided by the Norwegian National Registry (NNR) included 1,235 addresses where the addressee was either not found or could not be reached. These potential participants were never found and therefore excluded from the study. Current rules for conducting research surveys in Norway prohibit more than one reminder being sent out to non-responders to encourage participation. Based on a small pilot project testing the use of telephone reminders with Arabic speaking personnel conducted on 530 non-responders in the sample, it was decided that telephone reminders would be used for all non-responders with an available telephone number (N = 5,675). Telephone contact was made with less than half of this group (N = 2,087). Table S1 in the supplementary material summarizes the answers given by this group when asked to participate. The telephone reminders were conducted in late March and early April, 2019. A postal reminder which included the questionnaire, the cover letter with informed consent and a prepaid return envelope was also sent out to non-responders who were not reached via telephone (N = 5,000). The postal reminder was sent out in early June, 2019. Figure 1 summarizes the flow of participants through REFUGE-I, and Table 1 provides comparative statistics on participants in REFUGE-I vs. the source and sample population. Of the initial 9,990 sampled individuals, 8,752 were reached either by post or telephone and 902 returned the questionnaire (response rate = 10.3% if non-contacts are excluded). Of the 902 responders, 665 (73.2%) were willing to take part in later waves of the study.

1  
2  
3  
4  
5 According to the original plan registered at ClinicalTrials.gov, data collection was planned to  
6 run for about 6-8 weeks. However, due to a very low response rate at the time of the planned  
7 closing date in mid January 2019, the study was extended, and the final closing date was in  
8 early September 2019. All procedures concerning the selection and recruitment of  
9 participants, including consent procedures, were approved by the Regional Committees for  
10 Medical and Health Research Ethics (REC) - Region South East (A) in Norway. Reference  
11 number 2017/1252.  
12  
13  
14  
15  
16  
17  
18  
19  
20  
21  
22  
23  
24  
25  
26  
27  
28  
29  
30  
31  
32  
33  
34  
35  
36  
37  
38  
39  
40  
41  
42  
43  
44  
45  
46  
47  
48  
49  
50  
51  
52  
53  
54  
55  
56  
57  
58  
59  
60

For peer review only

Table 1. Demographic characteristics of participants vs. the source and sample populations

|                                         | Source population<br>N = 14,350 |        | Sample population<br>N = 9,990 |        | Participants<br>N = 902 |        | Participants willing to take part<br>in subsequent surveys<br>N = 665 |        |
|-----------------------------------------|---------------------------------|--------|--------------------------------|--------|-------------------------|--------|-----------------------------------------------------------------------|--------|
|                                         | n                               | (%)    | n                              | (%)    | n                       | (%)    | n                                                                     | (%)    |
| <b>Gender</b>                           |                                 |        |                                |        |                         |        |                                                                       |        |
| Female                                  | 5,117                           | (35.7) | 3,552                          | (35.5) | 320                     | (35.5) | 236                                                                   | (35.5) |
| Male                                    | 9,233                           | (64.3) | 6,446                          | (64.5) | 582                     | (64.5) | 429                                                                   | (64.5) |
| <b>Age<sup>1</sup></b>                  |                                 |        |                                |        |                         |        |                                                                       |        |
| 18-29                                   | 6,135                           | (42.8) | 4,265                          | (42.7) | 197                     | (21.8) | 148                                                                   | (22.2) |
| 30-39                                   | 4,769                           | (33.2) | 3,315                          | (33.1) | 310                     | (34.4) | 218                                                                   | (32.8) |
| 40-49                                   | 2,263                           | (15.8) | 1,604                          | (16.0) | 230                     | (25.5) | 173                                                                   | (26.0) |
| 50-64                                   | 1,034                           | (7.2)  | 721                            | (7.2)  | 145                     | (16.1) | 112                                                                   | (16.9) |
| >64                                     | 149                             | (1.0)  | 95                             | (1.0)  | 20                      | (2.2)  | 14                                                                    | (2.1)  |
| <b>Civil status<sup>1</sup></b>         |                                 |        |                                |        |                         |        |                                                                       |        |
| Unmarried                               | 5,879                           | (41.0) | 4,047                          | (40.5) | 236                     | (26.1) | 176                                                                   | (26.5) |
| Married                                 | 7,873                           | (54.8) | 5,545                          | (55.5) | 595                     | (66.0) | 433                                                                   | (65.1) |
| Other <sup>2</sup>                      | 598                             | (4.2)  | 398                            | (4.0)  | 71                      | (7.9)  | 56                                                                    | (8.4)  |
| <b>Year granted residency in Norway</b> |                                 |        |                                |        |                         |        |                                                                       |        |
| 2015                                    | 2,993                           | (20.8) | 2,081                          | (20.8) | N/A <sup>3</sup>        |        | N/A <sup>3</sup>                                                      |        |
| 2016                                    | 7,513                           | (52.4) | 5,267                          | (52.7) |                         |        |                                                                       |        |
| 2017                                    | 3,844                           | (26.8) | 2,652                          | (26.5) |                         |        |                                                                       |        |

<sup>1</sup> Age and civil status for the two participating groups was based on participants' answers in the questionnaire.

<sup>2</sup> Includes widow(er), separated, divorced

<sup>3</sup> Individual-level data on the year residency was granted was not provided by the Norwegian National Registry.

## METHODS

### Quantitative analysis

Three waves of questionnaire surveys are planned for the REFUGE-study (REFUGE-I, II, and III). Collection for REFUGE-I has already been completed as described above. REFUGE-II and III are scheduled to be carried out roughly one and two years after REFUGE-I, respectively. The questionnaire used will be very similar for all three waves of the study. Key variables are highlighted in Table 2 below.

Table 2. Summary of key measures used in the longitudinal, three-wave, questionnaire survey

|                                                                                             | Measure used <sup>1</sup>                                         | Comments                                                                                                                         |
|---------------------------------------------------------------------------------------------|-------------------------------------------------------------------|----------------------------------------------------------------------------------------------------------------------------------|
| <b>Outcome variables</b>                                                                    |                                                                   |                                                                                                                                  |
| Symptoms of PTSD                                                                            | Harvard Trauma Questionnaire, HTQ                                 | The first 16 items on trauma symptoms in section IV will be used                                                                 |
| Symptoms of anxiety and depression                                                          | Hopkins Symptom Checklist, HSCL-25                                | The first 10 of the total 25 items will be used to measure symptoms of anxiety and the last 15 to measure symptoms of depression |
| Quality of life                                                                             | World Health Organization Quality of Life assessment, WHOQOL-BREF | The scale consists of 26 items and all will be included                                                                          |
| Somatic pain                                                                                | Questions adapted from the Tromsø Study                           | 10 questions will be used, 5 concerning muscle/joint pain and 5 concerning more general somatic pain                             |
| Perceived general health                                                                    | European Social Survey                                            | 2 items from the scale will be included                                                                                          |
| Sleep difficulties                                                                          | The Bergen Insomnia Scale                                         | The scale consists of 6 items and all will be included                                                                           |
| <b>Predictor variables</b>                                                                  |                                                                   |                                                                                                                                  |
| Potentially traumatic experiences <i>before</i> the flight from Syria (pre-migratory PTEs)  | The Refugee Trauma History Checklist, RTHC                        | The scale consists of 8 items and all will be included                                                                           |
| Potentially traumatic experiences <i>during</i> the flight from Syria (peri-migratory PTEs) | The Refugee Trauma History Checklist, RTHC                        | The scale consists of 8 items and all will be included                                                                           |
| Post-migration stressful experiences                                                        | Post-migration stress scale                                       | The scale consists of 24 items and all will be included                                                                          |
| Social support                                                                              | ENRICH Social Support Inventory                                   | The first 6 items of the scale will be included                                                                                  |

<sup>1</sup> Further information on the measures used can be found in the ClinicalTrials.gov database where the study is registered (NCT03742128)

## Qualitative analysis

In addition to the quantitative aspect of the REFUGE-study, qualitative analyses are also planned for future waves of the study, comprising interviews and focus group sessions. Questions regarding participation and non-participation will be included in interview guides. Further themes for the interview and focus group guides are in development, and directions will be refined as further findings emerge from the existing quantitative dataset.

## Measures

In addition to the outcome variables listed in Table 2, the following measures are included in the questionnaire:

### Integration

Previous research has highlighted that active participation in social contexts promotes mental health, quality of life and beneficial health behaviours[16–18]. The REFUGE-study approaches integration in agreement with the primary domains suggested by Ager and Strang[19], which are: employment and labour market, school and education attainments, housing, and health and health care. Furthermore, and in line with suggestions by Castles[20] and Niemi et al[21], we consider civic and social participation/social exclusion to be central indicators of refugees' access to and active involvement in important spheres of the host societies, and these markers thus indicate a central component of social capital[22].

Therefore, in the first data wave, measures of integration, conceptualized as registry measures of education, work and school participation, sick leave and other health-related registry data, are included. Social integration is explored through measures of post migratory stress (e.g. “Often felt excluded or isolated in the Norwegian society”, “Often being unable to buy necessities”), social support and quality of life. In the coming data collection waves, a scale measuring social participation will also be included. This scale will be incorporated both in the quantitative part of the study and as a specific topic within the planned qualitative interviews and focus groups. Furthermore, when data collection waves 2 and 3 are completed, the bidirectional interaction between mental health and integration over time will be investigated.



## Outcomes

Complementary to the Harvard Trauma Questionnaire, an item is included regarding re-experiencing traumatic events or intrusive memories, which asks whether the participant experiences this, how often, and how distressing this is. Also included in the questionnaire is an item on daily effects of chronic physical illness, disability, infirmity or mental health problem/s.

## Predictors

In addition to the predictors listed in Table 2, the survey includes questions regarding violence and threats experienced since the participant's arrival in Norway, such as physical violence, threats, and theft. As an addition to the social support scale (ESSI), 3 items have been included to assess how easily the respondent can get help from neighbours, how many people the participant can count on when serious problems occur, and how much concern people show in what the respondent is doing.

## Sociodemographics

Important background and demographic variables include: gender, age, marital status, number of children, refugee status upon arrival (i.e. asylum seeker, quota refugee, family reunion, or other), whether the participant fled Syria alone or with a partner, family and/or friends, whether other family members had already settled in Norway prior to refugee's arrival in the country, time elapsed between when a participant fled Syria and arrived in Norway, and time in Norway prior to participating in the study. Tables 3 and 4 provide descriptive statistics on participants on the aforementioned variables from the first wave of data collection. The number of participants with missing values across variables can be interpreted from the table (applies for all tables).

Additional sociodemographic data collected include: smoking; alcohol and drug use; employment status (*Do you currently hold paid employment in Norway? Yes/No*); job satisfaction; self-reported competence in English and Norwegian language; and years of education completed (*How many years of schooling do you have? No education/1-5 years/6-9 years/10-12 years/More than 12 years*). Further details on the scales used, their psychometric properties and how variables will be handled in analyses can be found in the ClinicalTrials.gov database (NCT03742128).

Table 3. Descriptive statistics on participating refugees from Syria

|                                                   | Participants, N = 902 |         | Participants willing to take part in longitudinal questionnaire survey, N = 665 |         |
|---------------------------------------------------|-----------------------|---------|---------------------------------------------------------------------------------|---------|
|                                                   | n                     | (%)     | n                                                                               | (%)     |
| <b>Number of children</b>                         |                       |         |                                                                                 |         |
| I do not have children                            | 271                   | (31.6)  | 213                                                                             | (33.5)  |
| 1                                                 | 63                    | (7.4)   | 44                                                                              | (6.9)   |
| 2                                                 | 125                   | (14.6)  | 86                                                                              | (13.5)  |
| 3                                                 | 139                   | (16.2)  | 103                                                                             | (16.2)  |
| 4                                                 | 101                   | (11.8)  | 78                                                                              | (12.3)  |
| 5                                                 | 77                    | (9.0)   | 53                                                                              | (8.3)   |
| 6 or more                                         | 81                    | (9.5)   | 59                                                                              | (9.3)   |
| Total                                             | 857                   | (100.0) | 636                                                                             | (100.0) |
| <b>Education<sup>3</sup></b>                      |                       |         |                                                                                 |         |
| 9 years or less                                   | 394                   | (44.7)  | 281                                                                             | (43.0)  |
| 10-12 years                                       | 158                   | (17.9)  | 116                                                                             | (17.8)  |
| More than 12 years                                | 330                   | (37.4)  | 256                                                                             | (39.2)  |
| Total                                             | 882                   | (100.0) | 653                                                                             | (100.0) |
| <b>Refugee status upon arrival</b>                |                       |         |                                                                                 |         |
| Asylum seeker                                     | 454                   | (52.5)  | 325                                                                             | (51.0)  |
| Quota refugee                                     | 273                   | (31.6)  | 209                                                                             | (32.8)  |
| Family reunion                                    | 133                   | (15.4)  | 100                                                                             | (15.7)  |
| Other                                             | 4                     | (0.5)   | 3                                                                               | (0.5)   |
| Total                                             | 864                   | (100.0) | 637                                                                             | (100.0) |
| <b>Arrived in Norway...</b>                       |                       |         |                                                                                 |         |
| ...alone                                          | 247                   | (28.1)  | 182                                                                             | (28.0)  |
| ...with friends, but no family                    | 56                    | (6.4)   | 43                                                                              | (6.6)   |
| ...with family                                    | 576                   | (65.5)  | 425                                                                             | (65.4)  |
| Total                                             | 879                   | (100.0) | 650                                                                             | (100.0) |
| <b>Family member previously settled in Norway</b> |                       |         |                                                                                 |         |
| No                                                | 594                   | (68.3)  | 440                                                                             | (68.4)  |
| Yes                                               | 276                   | (31.7)  | 203                                                                             | (31.6)  |
| Total                                             | 870                   | (100.0) | 643                                                                             | (100.0) |
| <b>Length of flight<sup>1</sup></b>               |                       |         |                                                                                 |         |
| Less than 3 months                                | 165                   | (33.7)  | 124                                                                             | (33.9)  |
| 3 to 12 months                                    | 61                    | (12.4)  | 42                                                                              | (11.5)  |
| 1 to 2 years                                      | 59                    | (12.0)  | 43                                                                              | (11.7)  |
| 2 to 3 years                                      | 77                    | (15.7)  | 56                                                                              | (15.3)  |
| More than 3 years                                 | 128                   | (26.1)  | 101                                                                             | (27.6)  |
| Total                                             | 490                   | (100.0) | 366                                                                             | (100.0) |
| <b>Residency time in Norway<sup>2</sup></b>       |                       |         |                                                                                 |         |
| Less than 2 years                                 | 104                   | (16.8)  | 83                                                                              | (17.9)  |
| Between 2 and 3 years                             | 151                   | (24.4)  | 120                                                                             | (25.9)  |
| Between 3 and 4 years                             | 289                   | (46.7)  | 209                                                                             | (45.1)  |
| More than 4 years                                 | 75                    | (12.1)  | 51                                                                              | (11.0)  |
| Total                                             | 619                   | (100.0) | 463                                                                             | (100.0) |

<sup>1</sup> Estimated through the number of days elapsed between a refugee reportedly left Syria and arrived in Norway

<sup>2</sup> Estimated through the number of days elapsed between a refugee reportedly arrived in Norway and the date he/she returned the questionnaire

Table 4. Potentially traumatic experiences prior to and during the flight from Syria among participants

|                                                                                                                           |     | Participants<br>N = 902 <sup>1</sup> |        | Participants willing<br>to take part in<br>longitudinal survey<br>N = 665 <sup>1</sup> |        |
|---------------------------------------------------------------------------------------------------------------------------|-----|--------------------------------------|--------|----------------------------------------------------------------------------------------|--------|
|                                                                                                                           |     | n                                    | (%)    | n                                                                                      | (%)    |
| <b>Before you left your home, have you personally faced any of the following situations or events:</b>                    |     |                                      |        |                                                                                        |        |
| War at close quarters                                                                                                     | No  | 41                                   | (4.7)  | 31                                                                                     | (4.8)  |
|                                                                                                                           | Yes | 840                                  | (95.3) | 618                                                                                    | (95.2) |
| Forced separation from family or close friends                                                                            | No  | 324                                  | (40.3) | 235                                                                                    | (39.8) |
|                                                                                                                           | Yes | 480                                  | (59.7) | 355                                                                                    | (60.2) |
| Loss or disappearance of family member(s) or loved one(s)                                                                 | No  | 287                                  | (35.3) | 213                                                                                    | (35.5) |
|                                                                                                                           | Yes | 526                                  | (64.7) | 387                                                                                    | (64.5) |
| Physical violence or assault                                                                                              | No  | 554                                  | (70.5) | 400                                                                                    | (69.3) |
|                                                                                                                           | Yes | 232                                  | (29.5) | 177                                                                                    | (30.7) |
| Witnessing physical violence or assault                                                                                   | No  | 304                                  | (36.9) | 203                                                                                    | (33.5) |
|                                                                                                                           | Yes | 520                                  | (63.1) | 403                                                                                    | (66.5) |
| Torture                                                                                                                   | No  | 567                                  | (72.8) | 410                                                                                    | (71.6) |
|                                                                                                                           | Yes | 212                                  | (27.2) | 163                                                                                    | (28.4) |
| Sexual violence                                                                                                           | No  | 710                                  | (93.3) | 518                                                                                    | (92.7) |
|                                                                                                                           | Yes | 51                                   | (6.7)  | 41                                                                                     | (7.3)  |
| Other frightening situation(s) where you felt your life was in danger                                                     | No  | 103                                  | (12.0) | 74                                                                                     | (11.7) |
|                                                                                                                           | Yes | 754                                  | (88.0) | 561                                                                                    | (88.3) |
| <b>After you left your home, during your flight, have you personally faced any of the following situations or events:</b> |     |                                      |        |                                                                                        |        |
| War at close quarters                                                                                                     | No  | 408                                  | (49.3) | 310                                                                                    | (50.7) |
|                                                                                                                           | Yes | 420                                  | (50.7) | 302                                                                                    | (49.3) |
| Forced separation from family or close friends                                                                            | No  | 412                                  | (52.5) | 298                                                                                    | (51.5) |
|                                                                                                                           | Yes | 373                                  | (47.5) | 281                                                                                    | (48.5) |
| Loss or disappearance of family member(s) or loved one(s)                                                                 | No  | 422                                  | (53.8) | 312                                                                                    | (53.6) |
|                                                                                                                           | Yes | 362                                  | (46.2) | 270                                                                                    | (46.4) |
| Physical violence or assault                                                                                              | No  | 638                                  | (83.6) | 467                                                                                    | (83.5) |
|                                                                                                                           | Yes | 125                                  | (16.4) | 92                                                                                     | (16.5) |
| Witnessing physical violence or assault                                                                                   | No  | 566                                  | (72.6) | 405                                                                                    | (70.7) |
|                                                                                                                           | Yes | 214                                  | (27.4) | 168                                                                                    | (29.3) |
| Torture                                                                                                                   | No  | 657                                  | (86.8) | 481                                                                                    | (87.1) |
|                                                                                                                           | Yes | 100                                  | (13.2) | 71                                                                                     | (12.9) |
| Sexual violence                                                                                                           | No  | 722                                  | (97.3) | 529                                                                                    | (97.2) |
|                                                                                                                           | Yes | 20                                   | (2.7)  | 15                                                                                     | (2.8)  |
| Other frightening situation(s) where you felt your life was in danger                                                     | No  | 350                                  | (42.8) | 258                                                                                    | (42.9) |
|                                                                                                                           | Yes | 468                                  | (57.2) | 344                                                                                    | (57.1) |

<sup>1</sup> Not all participants answered all items, therefore, the total number of answers for a given item may be less than 902 and 665 for the two groups, respectively.

1  
2  
3 The administration and logistics of the survey was handled by the research and consulting  
4 firm, Ipsos, which has extensive experience with and infrastructure for these types of surveys.  
5 Ipsos is also responsible for securely storing participants' Norwegian identity numbers so that  
6 longitudinal tracking of individuals and linking to registry data is possible. The identity  
7 numbers are unknown to all researchers involved.  
8  
9  
10  
11  
12

### 13 Registry data

14  
15 As part of the consent procedure, the cover letter explained that participation in the study  
16 entailed that questionnaire data would be linked to registry data in the following Norwegian  
17 registries: National education database, NUDB (provides education statistics on an  
18 individual level from 1970 up until the present); employment and sick-leave databases  
19 (contain individual level data on work-participation and doctor-certified sickness absence  
20 from work); Norwegian Prescription Database, NorPD (contains individual level data on all  
21 prescription drugs dispensed by pharmacies in Norway); the KUHR database (contains  
22 individual level data on the utilization of primary health care services in Norway - e.g.  
23 primary care doctors and physiotherapists); and the Norwegian Patient Registry, NPR  
24 (contains individual level data on the utilization of specialized health care in Norway).  
25  
26  
27  
28  
29  
30  
31  
32  
33

### 34 Patient and public involvement

35  
36 The REFUGE-study was supported throughout the development process by members of the  
37 community. Focus groups were held in the early stages of development in order to tailor the  
38 questionnaire, and a user reference group was created in order to act as an advisory group,  
39 providing insight during the planning, development and implementation stages. Community  
40 members were also involved in the recruitment process, providing insight and advice on the  
41 dissemination of information about the study through social media.  
42  
43  
44  
45  
46  
47

### 48 Findings to date

49  
50 The first wave of data collection in Norway has been completed. At the time of writing, no  
51 findings have been published.  
52  
53  
54

### 55 Strengths and limitations

56  
57 The REFUGE-study has several important strengths, both in terms of methodology, and in  
58 value of the resulting data. Firstly, the study population was randomly selected from a large  
59 source population consisting of all adult refugees from Syria residing in Norway who met the  
60

1  
2  
3 study's eligibility criteria, obtained from the Norwegian National Registry. In comparison,  
4 many of the previous studies on mental health in refugee populations rely on convenience  
5 sampling. Further, the use of a three-wave longitudinal survey design will allow for better  
6 exploration of cause-effect relationships between variables in the study, than purely cross-  
7 sectional data. In addition, research on the association between refugee mental health and  
8 integration is scarce. By linking longitudinal questionnaire data to registry data on education-,  
9 work- and health-related parameters, the study could make important contributions to the  
10 dearth of evidence on this topic. Also, combining self-report data with registry data from  
11 well-established national registries may reduce common method bias. Research on refugee  
12 mental health to date relies heavily on self-report data. A further strength of the study is that  
13 most of the key variables are measured using well-documented and validated scales. Review  
14 articles on refugee mental health frequently highlight the large degree of variance in terms of  
15 methods used, and call for increased focus on methodological issues. Lastly, the close  
16 collaboration between the REFUGE-study group in Norway and its main collaborating  
17 partner, the Red Cross University College in Sweden, will offer ample opportunities to  
18 compare Syrian refugee populations in two different countries, as both projects use similar  
19 measures and have agreed to collaborate on and combine datasets.  
20  
21  
22  
23  
24  
25  
26  
27  
28  
29  
30  
31  
32

33 An important potential weakness of REFUGE-I is that less than 11 percent of the sampled  
34 population participated in the study. This could lead to selection bias problems. As can be  
35 seen from Table 1, participants are very similar to the source and sample population in terms  
36 of gender, though the proportion of young and unmarried refugees are notably smaller in the  
37 participating group. Table S2 in the supplementary material shows that the geographical  
38 distribution across Norway's 18 counties was very similar for participants and the sample  
39 population. In terms of residency status, participants had the same proportional breakdown as  
40 the sample population: 95% had temporary residency in Norway at the time of the survey and  
41 5% had permanent residency (result not shown in tables). In order to further explore selection  
42 bias, we investigated whether there were any trends across demographic and background  
43 variables in terms of when the surveys were filled out and returned. Given that the survey was  
44 open for nine months, exploring the timing of participation may give some indication of  
45 different groups' willingness to participate, and, by extension, suggest which groups may be  
46 over- and underrepresented among participants. . While the most common reason for non-  
47 participation was unwillingness, a potentially significant contributing factor to the low  
48 participation rate may be the presence of low literacy rates within the sampled population. As  
49  
50  
51  
52  
53  
54  
55  
56  
57  
58  
59  
60

1  
2  
3 shown in Figure 1, 49 participants stated an inability to read Arabic to explain non-  
4 participation, and it is conceivable that this was the case for a number of sampled individuals  
5 who failed to return the survey. Regrettably, current ethical laws in Norway do not allow for  
6 an online-based questionnaire where Arabic voice-over could be utilized. Therefore, potential  
7 participants with low reading and writing proficiency regrettably were effectively excluded.  
8  
9

10  
11  
12  
13 Table S3 in the supplementary material shows the distribution of demographic variables  
14 across 4 different time-periods of participation (i.e. the 9-month period the survey was open  
15 was divided into 4 shorter periods), and Table S4 shows the distribution across background  
16 characteristics related to refugee status and history. Differences in distributions across  
17 time-periods were tested with chi-square test of equal proportion. As can be seen from the  
18 tables, there was weak or no evidence that the timing of participation was related to  
19 demographic and/or background variables with three exceptions. First, there was very clear  
20 evidence that residency time in Norway was negatively associated with early participation -  
21 i.e. the longer a refugee's residency time in Norway, the less likely (s)he was to participate in  
22 the first time-periods following study launch ( $p < 0.001$ ), relatively speaking. There was also  
23 very strong statistical evidence ( $p < 0.001$ ) that pre-migratory stress was associated with the  
24 timing of participation, though the underlying trend was not easily interpretable. Refugees  
25 with the highest number of potentially traumatic pre-flight experiences (PTEs) were more  
26 likely to participate in the early periods after study launch (relatively speaking). This was not  
27 true, however, for the refugee group with the second to most PTEs. Lastly, there was  
28 moderate evidence that refugee status upon arrival was association with the timing of  
29 participation ( $p = 0.01$ ), though no clear underlying pattern was evident.  
30  
31  
32  
33  
34  
35  
36  
37  
38  
39  
40  
41  
42

43 Another limitation of the present study is the survey design used to attain prevalences of  
44 depression, anxiety and PTSD symptoms. Short-form questionnaires, while efficient, do not  
45 capture all aspects of the measured constructs. Additionally, recent studies have suggested  
46 that when self-report measures are used, resulting prevalences tend to be higher than when  
47 using diagnostic interviews[23,24]. However, the questionnaires used in the current study to  
48 measure PTSD, anxiety and depression have been validated for use within the studied  
49 population and their use allows for many more participants to be reached, improving the  
50 generalizability of the findings.  
51  
52  
53  
54  
55  
56  
57

58 Perhaps the most significant learning opportunity provided by the present study thus far has  
59 been the challenging recruitment process. Although extensive recruitment efforts were  
60

1  
2  
3 employed, the participation rate for REFUGE-I was just above 10%. As noted previously,  
4 methods to boost recruitment involved the utilisation of contacts within the community,  
5 dedicated Facebook and web pages in Arabic, and Q&A sessions held at Adult Education  
6 centres in Norway's major cities, as well as the dissemination of information about the project  
7 online through purpose-built, animated videos and newsletters. Researchers aiming to gather  
8 data from similar populations would do well to ensure that sufficient time and resources are  
9 dedicated to the recruitment phase of the study.  
10  
11  
12  
13  
14  
15  
16

### 17 **Future plans**

18 The REFUGE-cohort study will conduct a second wave of data collection in 2020. A third  
19 wave of data collection is planned in 2021, pending funding. Furthermore, we plan to link  
20 questionnaire data to Norwegian registry data after all three waves of data collection have  
21 been completed. Registry data will be obtained for time-periods both prior to and after the  
22 three-wave survey. Primary and secondary objectives with detailed plans for analyses for  
23 studies involving registry data will be registered at ClinicalTrials.gov prior to obtaining the  
24 registry data, so that true hypothesis-testing studies from the REFUGE-cohort are  
25 distinguishable from more exploratory and data-driven studies. Finally, pending ethics  
26 approval, we will begin the process of merging the Norwegian REFUGE-cohort with existing  
27 datasets in Sweden, creating the REFUGE-database.  
28  
29  
30  
31  
32  
33  
34  
35  
36

37 Parallel to completing the survey data collection, data-merging and registry data obtainment,  
38 we aim to publish papers in accordance with our pre-registered publication plan at  
39 ClinicalTrials.gov.  
40  
41  
42  
43  
44

### 45 **COLLABORATION**

46 We welcome potential collaboration with other research groups. Interested researchers should  
47 contact the REFUGE research group for collaboration and knowledge-sharing. Locally  
48 collected data can then be added to the REFUGE-database. Reference estimates (e.g.  
49 prevalence, incidence and associations) can then be continuously updated and made available  
50 to researchers abiding by the EU's GDPR laws and regulations. In addition, the REFUGE-  
51 database will also include data obtained through Scandinavian social and health-registries.  
52  
53  
54  
55  
56  
57  
58  
59  
60



1  
2  
3 **Acknowledgements:** The authors would especially like to thank all participating refugees and  
4 asylum-seekers for taking part in both the main study and preparatory stages of the project.  
5 The authors would also like to thank the reference group for their valuable comments and  
6 suggestions along the way. Finally, we would like to give special thanks to our trusted Arabic  
7 interpreter/translator for excellent work throughout the project period.  
8  
9  
10  
11  
12

13 **Contributors:** AN, PC, FS, AA and ØS contributed to the conception of this article. AN, PC,  
14 FS, AA and ØS were involved in manuscript writing and revision. AN and ØS were involved  
15 in data analysis and data presentation. All authors read, contributed substantially to and  
16 approved the final manuscript.  
17  
18  
19

20 **Competing Interests:** None declared.  
21  
22  
23

24 **Funding:** The REFUGE-study was funded by the Norwegian Centre for Violence and  
25 Traumatic Stress Studies (NKVTS). No external funding was received.  
26  
27  
28  
29

30 **Data availability:** Deidentified participant data will be made available for reuse upon  
31 reasonable request pending ethics approval, compliance with the General Data Protection  
32 Regulation (GDPR), and discretion of the research group with regard to the prospective  
33 research project proposal. Requests should be sent to [refuge@nkvts.no](mailto:refuge@nkvts.no). Additional  
34 information regarding the scales used, statistical analysis plans and future data collection is  
35 available through ClinicalTrials.gov (NCT03742128).  
36  
37  
38  
39  
40  
41  
42

### 43 **Licence Statement**

44 I, the Submitting Author has the right to grant and does grant on behalf of all authors of the  
45 Work (as defined in the below author licence), an exclusive licence and/or a non-exclusive  
46 licence for contributions from authors who are: i) UK Crown employees; ii) where BMJ has  
47 agreed a CC-BY licence shall apply, and/or iii) in accordance with the terms applicable for  
48 US Federal Government officers or employees acting as part of their official duties; on a  
49 worldwide, perpetual, irrevocable, royalty-free basis to BMJ Publishing Group Ltd (“BMJ”)  
50 its licensees and where the relevant Journal is co-owned by BMJ to the co-owners of the  
51 Journal, to publish the Work in BMJ Open and any other BMJ products and to exploit all  
52 rights, as set out in our licence.  
53  
54  
55  
56  
57  
58  
59  
60



1  
2  
3 The Submitting Author accepts and understands that any supply made under these terms is  
4 made by BMJ to the Submitting Author unless you are acting as an employee on behalf of  
5 your employer or a postgraduate student of an affiliated institution which is paying any  
6 applicable article publishing charge (“APC”) for Open Access articles. Where the Submitting  
7 Author wishes to make the Work available on an Open Access basis (and intends to pay the  
8 relevant APC), the terms of reuse of such Open Access shall be governed by a Creative  
9 Commons licence – details of these licences and which Creative Commons licence will apply  
10 to this Work are set out in our licence referred to above.  
11  
12  
13  
14  
15  
16  
17  
18

19 **Figure legend:**

20  
21 **Figure 1:** Flowchart of participants through the study.

22  
23 <sup>1</sup> Refugees were either resettlement/quota refugees; asylum seekers who were granted asylum  
24 in Norway; or individuals coming through the program *Family immigration with a person*  
25 *who has protection (asylum) in Norway*. The source population was identified through the  
26 Norwegian National Registry (NNR)  
27  
28

29 <sup>2</sup> Information was obtained when non-responders were contacted during the telephone  
30 reminder  
31  
32  
33  
34  
35  
36  
37

38 REFERENCES

- 39  
40  
41 1 United Nations High Commissioner for Refugees. UNHCR Global Trends 2018.  
42 UNHCR. [https://www.unhcr.org/statistics/unhcrstats/5d08d7ee7/unhcr-global-trends-](https://www.unhcr.org/statistics/unhcrstats/5d08d7ee7/unhcr-global-trends-2018.html)  
43 [2018.html](https://www.unhcr.org/statistics/unhcrstats/5d08d7ee7/unhcr-global-trends-2018.html) (accessed 2 Mar 2020).  
44  
45 2 Steel Z, Chey T, Silove D, *et al*. Association of torture and other potentially traumatic  
46 events with mental health outcomes among populations exposed to mass conflict and  
47 displacement: a systematic review and meta-analysis. *JAMA* 2009;**302**:537–49.  
48 doi:10.1001/jama.2009.1132  
49  
50 3 Marshall GN, Schell TL, Elliott MN, *et al*. Mental health of Cambodian refugees 2  
51 decades after resettlement in the United States. *JAMA* 2005;**294**:571–9.  
52 doi:10.1001/jama.294.5.571  
53  
54 4 Priebe S. *Public Health Aspects of Mental Health Among Migrants and Refugees: A*  
55 *Review of the Evidence on Mental Health Care for Refugees, Asylum Seekers and*  
56 *Irregular Migrants in the WHO European Region*. World Health Organization 2016.  
57 [https://play.google.com/store/books/details?id=Y\\_hQMQAACAAJ](https://play.google.com/store/books/details?id=Y_hQMQAACAAJ)  
58  
59  
60

- 1  
2  
3 5 American Psychiatric Association. *Diagnostic and statistical manual of mental*  
4 *disorders, (5th ed.)*. Washington, DC: Author 2013.
- 5  
6 6 WHO | International Classification of Diseases, 11th Revision (ICD-11). Published  
7 Online First: 11 October 2019. <https://www.who.int/classifications/icd/en/> (accessed 5  
8 Nov 2019).
- 9  
10  
11 7 de Vroome T, van Tubergen F. The Employment Experience of Refugees in the  
12 Netherlands. *Int Migr Rev* 2010;**44**:376–403. doi:10.1111/j.1747-7379.2010.00810.x
- 13  
14 8 Schick M, Zumwald A, Knöpfli B, *et al*. Challenging future, challenging past: the  
15 relationship of social integration and psychological impairment in traumatized refugees.  
16 *Eur J Psychotraumatol* 2016;**7**:28057. doi:10.3402/ejpt.v7.28057
- 17  
18 9 Bakker L, Dagevos J, Engbersen G. The Importance of Resources and Security in the  
19 Socio-Economic Integration of Refugees. A Study on the Impact of Length of Stay in  
20 Asylum Accommodation and Residence Status on Socio-Economic Integration for the  
21 Four Largest Refugee Groups in the Netherlands. *Journal of International Migration and*  
22 *Integration* 2014;**15**:431–48. doi:10.1007/s12134-013-0296-2
- 23  
24  
25 10 Beiser M. The health of immigrants and refugees in Canada. *Can J Public Health*  
26 2005;**96 Suppl 2**:S30–44. <https://www.ncbi.nlm.nih.gov/pubmed/16078554>
- 27  
28 11 Population Characteristics Norway. ssb.no.  
29 <https://www.ssb.no/en/befolkning/nokkeltall/population> (accessed 2 Mar 2020).
- 30  
31 12 Characteristics of persons with refugee background in Norway. ssb.no.  
32 <https://www.ssb.no/en/flyktninger> (accessed 2 Mar 2020).
- 33  
34 13 Want to apply. UDI. <https://www.udi.no/en/want-to-apply/> (accessed 2 Mar 2020).
- 35  
36 14 Global Trends - Forced Displacement in 2018 - UNHCR. UNHCR Global Trends 2018.  
37 <https://www.unhcr.org/globaltrends2018/> (accessed 26 Oct 2019).
- 38  
39 15 Where Syrian refugees have resettled worldwide. Pew Research Center.  
40 [https://www.pewresearch.org/fact-tank/2018/01/29/where-displaced-syrians-have-](https://www.pewresearch.org/fact-tank/2018/01/29/where-displaced-syrians-have-resettled/)  
41 [resettled/](https://www.pewresearch.org/fact-tank/2018/01/29/where-displaced-syrians-have-resettled/) (accessed 26 Oct 2019).
- 42  
43 16 Johnson CM, Rostila M, Svensson AC, *et al*. The role of social capital in explaining  
44 mental health inequalities between immigrants and Swedish-born: a population-based  
45 cross-sectional study. *BMC Public Health* 2017;**17**:117. doi:10.1186/s12889-016-3955-  
46 3s
- 47  
48 17 Khawaja M, Tewtel-Salem M, Obeid M, *et al*. Civic engagement, gender and self-rated  
49 health in poor communities: Evidence from Jordan's refugee camps. *Health Sociol Rev*  
50 2006;**15**:192–208. <https://www.tandfonline.com/doi/abs/10.5172/hesr.2006.15.2.192>
- 51  
52 18 Lindström M, Hanson BS, Ostergren PO. Socioeconomic differences in leisure-time  
53 physical activity: the role of social participation and social capital in shaping health  
54 related behaviour. *Soc Sci Med* 2001;**52**:441–51. doi:10.1016/s0277-9536(00)00153-2
- 55  
56 19 Ager A, Strang A. Understanding Integration: A Conceptual Framework. *J Refug Stud*

- 1  
2  
3 2008;**21**:166–91. doi:10.1093/jrs/fen016  
4  
5 20 Castles S, Korac M, Vasta E, *et al*. Integration: Mapping the field. *Home Office online*  
6 *report* 2002;**29**:115–8.  
7  
8 21 Niemi M, Manhica H, Gunnarsson D, *et al*. A Scoping Review and Conceptual Model of  
9 Social Participation and Mental Health among Refugees and Asylum Seekers. *Int J*  
10 *Environ Res Public Health* 2019;**16**. doi:10.3390/ijerph16204027  
11  
12  
13 22 Hynie, M, Korn, A, Tao, D. Social context and social integration for Government  
14 Assisted Refugees in Ontario, Canada. In: Poteet, M, Nourpanah, S, eds. *After the Flight:*  
15 *The Dynamics of Refugee Settlement and Integration*. Newcastle upon Tyne,  
16 UK: Cambridge Scholars; 2016:183–227  
17  
18 23 Thombs BD, Kwakkenbos L, Levis AW, *et al*. Addressing overestimation of the  
19 prevalence of depression based on self-report screening questionnaires. *Canadian*  
20 *Medical Association Journal*. 2018;**190**:E44–9. doi:10.1503/cmaj.170691  
21  
22  
23 24 Hoffman YSG, Diamond GM, Lipsitz JD. The challenge of estimating PTSD prevalence  
24 in the context of ongoing trauma: the example of Israel during the Second Intifada. *J*  
25 *Anxiety Disord* 2011;**25**:788–93. doi:10.1016/j.janxdis.2011.03.016  
26  
27  
28  
29  
30  
31  
32  
33  
34  
35  
36  
37  
38  
39  
40  
41  
42  
43  
44  
45  
46  
47  
48  
49  
50  
51  
52  
53  
54  
55  
56  
57  
58  
59  
60

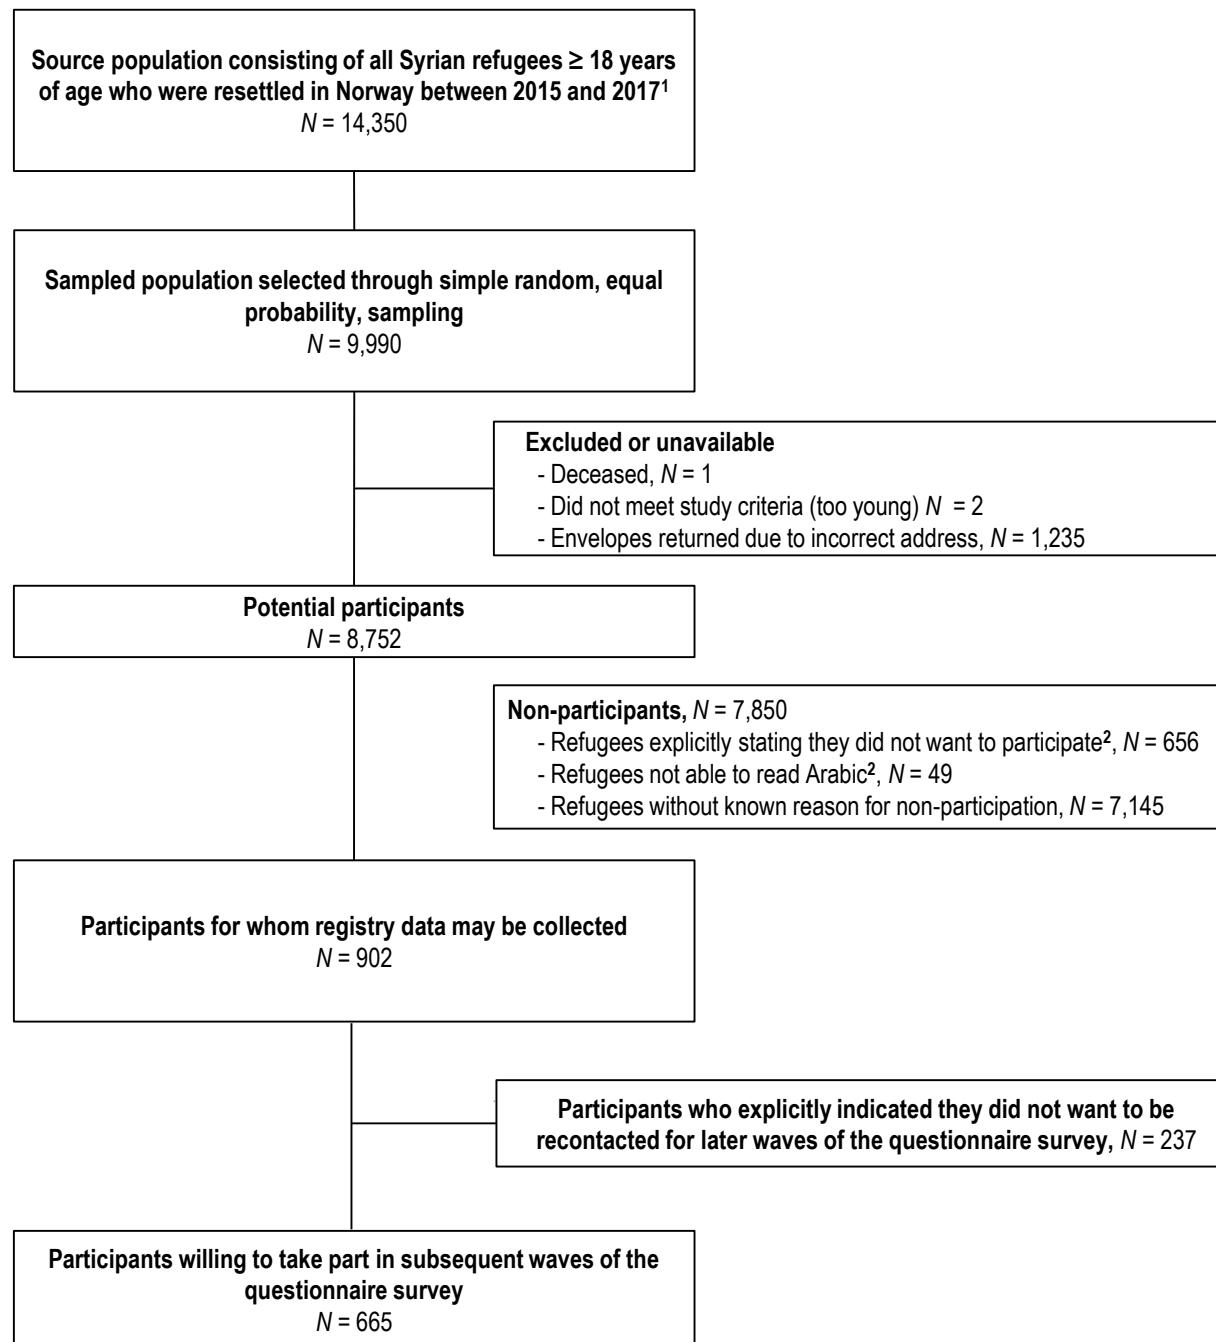

Table S1. Responses given by initial non-responders during telephone reminder sessions (N = 2,087)

|                                                                 | N     | (%)     |
|-----------------------------------------------------------------|-------|---------|
| Answers given by refugees                                       |       |         |
| Would like to participate and does not need a new questionnaire | 403   | (19.1)  |
| Would like to participate and needs a new questionnaire         | 856   | (40.8)  |
| Does not want to participate                                    | 656   | (30.8)  |
| Moved and wants a new questionnaire                             | 69    | (3.3)   |
| Moved and does not want a new questionnaire                     | 29    | (1.4)   |
| Wrong number/person                                             | 25    | (1.2)   |
| Does not understand Arabic                                      | 49    | (2.4)   |
| Total                                                           | 2,087 | (100.0) |

Table S2. Geographical distribution across Norway's 18 counties for participants and sample population of refugees from Syria

|                  | Sample population<br>N = 9,990 |         | Participants<br>N = 902 |         |
|------------------|--------------------------------|---------|-------------------------|---------|
|                  | n                              | (%)     | n                       | (%)     |
| Akershus         | 703                            | (7.0)   | 52                      | (5.7)   |
| Aust-Agder       | 347                            | (3.5)   | 30                      | (3.3)   |
| Buskerud         | 470                            | (4.7)   | 39                      | (4.3)   |
| Finnmark         | 254                            | (2.5)   | 23                      | (2.6)   |
| Hedmark          | 311                            | (3.1)   | 30                      | (3.3)   |
| Hordaland        | 1,009                          | (10.1)  | 88                      | (9.8)   |
| Møre og Romsdal  | 486                            | (4.9)   | 51                      | (5.7)   |
| Nordland         | 670                            | (6.7)   | 65                      | (7.2)   |
| Oppland          | 381                            | (3.8)   | 37                      | (4.1)   |
| Oslo             | 773                            | (7.7)   | 70                      | (7.9)   |
| Rogaland         | 831                            | (8.3)   | 63                      | (7.0)   |
| Sogn og Fjordane | 380                            | (3.8)   | 34                      | (3.8)   |
| Telemark         | 398                            | (4.0)   | 40                      | (4.4)   |
| Troms            | 449                            | (4.5)   | 51                      | (5.7)   |
| Trøndelag        | 1,049                          | (10.5)  | 96                      | (10.5)  |
| Vest-Agder       | 520                            | (5.2)   | 50                      | (5.5)   |
| Vestfold         | 475                            | (4.8)   | 44                      | (4.9)   |
| Østfold          | 484                            | (4.9)   | 39                      | (4.3)   |
| Total            | 9,990                          | (100.0) | 902                     | (100.0) |

Table S3. Demographic characteristics of participating refugees from Syria according to when they returned the questionnaire

|                    | 4 <sup>th</sup> quarter<br>2018 |         | 1 <sup>st</sup> quarter<br>2019 |         | 2 <sup>nd</sup> quarter<br>2019 |         | 3 <sup>rd</sup> quarter<br>2019 |         | Total |         | Chi-<br>square |
|--------------------|---------------------------------|---------|---------------------------------|---------|---------------------------------|---------|---------------------------------|---------|-------|---------|----------------|
|                    | n                               | (%)     | n                               | (%)     | n                               | (%)     | n                               | (%)     | n     | (%)     |                |
| Gender             |                                 |         |                                 |         |                                 |         |                                 |         |       |         | 0.08           |
| Male               | 278                             | (64.2)  | 66                              | (69.5)  | 157                             | (68.0)  | 77                              | (55.8)  | 578   | (64.4)  |                |
| Female             | 155                             | (35.8)  | 29                              | (30.5)  | 74                              | (32.0)  | 61                              | (44.2)  | 319   | (35.6)  |                |
| Total              | 433                             | (100.0) | 95                              | (100.0) | 231                             | (100.0) | 138                             | (100.0) | 897   | (100.0) |                |
| Age groups         |                                 |         |                                 |         |                                 |         |                                 |         |       |         | 0.36           |
| 18-29              | 87                              | (20.1)  | 28                              | (29.5)  | 50                              | (21.6)  | 31                              | (22.5)  | 196   | (21.9)  |                |
| 30-39              | 142                             | (32.8)  | 28                              | (29.5)  | 88                              | (38.1)  | 50                              | (36.2)  | 308   | (34.3)  |                |
| 40-49              | 122                             | (28.2)  | 19                              | (20.0)  | 52                              | (22.5)  | 36                              | (26.1)  | 229   | (25.5)  |                |
| 50-64              | 72                              | (16.6)  | 19                              | (20.0)  | 37                              | (16.1)  | 16                              | (11.6)  | 140   | (15.6)  |                |
| >64                | 10                              | (2.3)   | 1                               | (1.0)   | 4                               | (1.7)   | 5                               | (3.6)   | 24    | (2.7)   |                |
| Total              | 433                             | (100.0) | 95                              | (100.0) | 231                             | (100.0) | 138                             | (100.0) | 897   | (100.0) |                |
| Civil status       |                                 |         |                                 |         |                                 |         |                                 |         |       |         | 0.10           |
| Unmarried          | 121                             | (27.9)  | 31                              | (32.6)  | 60                              | (26.0)  | 22                              | (15.9)  | 234   | (26.1)  |                |
| Married            | 276                             | (63.7)  | 58                              | (61.1)  | 154                             | (66.7)  | 104                             | (75.4)  | 592   | (66.0)  |                |
| Other <sup>1</sup> | 36                              | (8.3)   | 6                               | (6.3)   | 17                              | (7.4)   | 12                              | (8.7)   | 71    | (7.9)   |                |
| Total              | 433                             | (100.0) | 95                              | (100.0) | 231                             | (100.0) | 138                             | (100.0) | 897   | (100.0) |                |
| Education          |                                 |         |                                 |         |                                 |         |                                 |         |       |         | 0.53           |
| 9 years or less    | 187                             | (44.4)  | 38                              | (42.2)  | 111                             | (48.7)  | 53                              | (38.4)  | 389   | (44.4)  |                |
| 10-12 years        | 74                              | (17.6)  | 18                              | (20.0)  | 35                              | (15.4)  | 31                              | (22.5)  | 158   | (18.0)  |                |
| More than 12 years | 160                             | (38.0)  | 34                              | (37.8)  | 82                              | (36.0)  | 54                              | (39.1)  | 330   | (37.6)  |                |
| Total              | 421                             | (100.0) | 90                              | (100.0) | 228                             | (100.0) | 138                             | (100.0) | 877   | (100.0) |                |

<sup>1</sup> Includes: divorced, widow(er), separated

Table S4. Refugee and migratory characteristics of participating refugees from Syria according to when they returned the questionnaire

|                                 | 4 <sup>th</sup> quarter<br>2018 |         | 1 <sup>st</sup> quarter<br>2019 |         | 2 <sup>nd</sup> quarter<br>2019 |         | 3 <sup>rd</sup> quarter<br>2019 |         | Total |         | Chi-<br>square |
|---------------------------------|---------------------------------|---------|---------------------------------|---------|---------------------------------|---------|---------------------------------|---------|-------|---------|----------------|
|                                 | n                               | (%)     | n                               | (%)     | n                               | (%)     | n                               | (%)     | n     | (%)     |                |
| Ref. status upon arrival        |                                 |         |                                 |         |                                 |         |                                 |         |       |         | 0.01           |
| Asylum seeker                   | 208                             | (50.5)  | 54                              | (61.4)  | 122                             | (54.7)  | 66                              | (48.5)  | 450   | (52.4)  |                |
| Quota refugee                   | 147                             | (35.7)  | 20                              | (22.7)  | 70                              | (31.4)  | 35                              | (25.7)  | 272   | (31.7)  |                |
| Family reunion                  | 55                              | (13.3)  | 14                              | (15.9)  | 31                              | (13.9)  | 33                              | (24.3)  | 133   | (15.5)  |                |
| Other                           | 2                               | (0.5)   | 0                               | (0.0)   | 0                               | (0.0)   | 2                               | (1.5)   | 4     | (0.5)   |                |
| Total                           | 412                             | (100.0) | 88                              | (100.0) | 223                             | (100.0) | 136                             | (100.0) | 859   | (100.0) |                |
| Arrived in Norway...            |                                 |         |                                 |         |                                 |         |                                 |         |       |         | 0.47           |
| ...alone                        | 121                             | (28.8)  | 30                              | (32.6)  | 64                              | (28.1)  | 31                              | (23.0)  | 246   | (28.1)  |                |
| ...with friends only            | 31                              | (7.4)   | 7                               | (7.6)   | 11                              | (4.8)   | 7                               | (5.2)   | 56    | (6.4)   |                |
| ...with family                  | 268                             | (63.8)  | 55                              | (59.8)  | 153                             | (67.1)  | 97                              | (71.9)  | 573   | (65.5)  |                |
| Total                           | 420                             | (100.0) | 92                              | (100.0) | 228                             | (100.0) | 135                             | (100.0) | 875   | (100.0) |                |
| Length of flight                |                                 |         |                                 |         |                                 |         |                                 |         |       |         | 0.58           |
| Less than 3 months              | 73                              | (31.2)  | 20                              | (39.2)  | 42                              | (33.6)  | 30                              | (37.5)  | 165   | (33.7)  |                |
| 3 to 12 months                  | 24                              | (10.3)  | 6                               | (11.8)  | 17                              | (13.6)  | 14                              | (17.5)  | 61    | (12.4)  |                |
| 1 to 2 years                    | 31                              | (13.2)  | 7                               | (13.7)  | 15                              | (12.0)  | 6                               | (7.5)   | 59    | (12.0)  |                |
| 2 to 3 years                    | 34                              | (14.5)  | 7                               | (13.7)  | 22                              | (17.6)  | 14                              | (17.5)  | 77    | (15.7)  |                |
| More than 3 years               | 72                              | (30.8)  | 11                              | (21.6)  | 29                              | (23.2)  | 16                              | (20.0)  | 128   | (26.1)  |                |
| Total                           | 234                             | (100.0) | 51                              | (100.0) | 125                             | (100.0) | 80                              | (100.0) | 490   | (100.0) |                |
| Residency time in<br>Norway     |                                 |         |                                 |         |                                 |         |                                 |         |       |         | <0.001         |
| Less than 2 years               | 69                              | (22.9)  | 12                              | (18.5)  | 16                              | (10.3)  | 7                               | (7.2)   | 104   | (16.8)  |                |
| 2-3 years                       | 73                              | (24.3)  | 14                              | (21.5)  | 38                              | (24.4)  | 26                              | (26.8)  | 151   | (24.4)  |                |
| 3-4 years                       | 140                             | (46.5)  | 32                              | (49.2)  | 76                              | (48.7)  | 41                              | (42.3)  | 289   | (46.7)  |                |
| More than 4 years               | 19                              | (6.3)   | 7                               | (10.8)  | 26                              | (16.7)  | 23                              | (23.7)  | 75    | (12.1)  |                |
| Total                           | 301                             | (100.0) | 65                              | (100.0) | 156                             | (100.0) | 97                              | (100.0) | 619   | (100.0) |                |
| PTEs before flight <sup>1</sup> |                                 |         |                                 |         |                                 |         |                                 |         |       |         | <0.001         |
| 0-1                             | 34                              | (7.9)   | 10                              | (10.6)  | 34                              | (14.8)  | 15                              | (11.3)  | 93    | (10.5)  |                |
| 2-3                             | 101                             | (23.4)  | 25                              | (26.6)  | 86                              | (37.4)  | 29                              | (21.8)  | 241   | (27.1)  |                |
| 4-5                             | 185                             | (42.9)  | 34                              | (36.2)  | 75                              | (32.6)  | 64                              | (48.1)  | 358   | (40.3)  |                |
| >5                              | 111                             | (25.8)  | 25                              | (26.6)  | 35                              | (15.2)  | 25                              | (18.8)  | 196   | (22.1)  |                |
| Total                           | 431                             | (100.0) | 94                              | (100.0) | 230                             | (100.0) | 133                             | (100.0) | 888   | (100.0) |                |
| PTEs during flight <sup>1</sup> |                                 |         |                                 |         |                                 |         |                                 |         |       |         | 0.46           |
| 0-1                             | 154                             | (36.8)  | 31                              | (34.1)  | 96                              | (42.7)  | 54                              | (41.9)  | 335   | (38.8)  |                |
| 2-3                             | 143                             | (34.2)  | 32                              | (35.1)  | 71                              | (31.6)  | 33                              | (25.6)  | 279   | (32.3)  |                |
| 4-5                             | 89                              | (21.3)  | 19                              | (20.9)  | 48                              | (21.3)  | 32                              | (24.8)  | 188   | (21.8)  |                |
| >5                              | 32                              | (7.7)   | 9                               | (9.9)   | 10                              | (4.4)   | 10                              | (7.7)   | 61    | (7.1)   |                |
| Total                           | 418                             | (100.0) | 91                              | (100.0) | 225                             | (100.0) | 129                             | (100.0) | 863   | (100.0) |                |

<sup>1</sup> All individuals with at least one answered item on the PTE-scale were given a sum-score for total PTEs before/during flight



# BMJ Open

## Cohort profile: Resettlement in Uprooted Groups Explored (REFUGE) – A longitudinal study of mental health and integration in adult refugees from Syria resettled in Norway between 2015 and 2017

|                                 |                                                                                                                                                                                                                                                                                                                                                                                                                                                                           |
|---------------------------------|---------------------------------------------------------------------------------------------------------------------------------------------------------------------------------------------------------------------------------------------------------------------------------------------------------------------------------------------------------------------------------------------------------------------------------------------------------------------------|
| Journal:                        | <i>BMJ Open</i>                                                                                                                                                                                                                                                                                                                                                                                                                                                           |
| Manuscript ID                   | bmjopen-2019-036101.R2                                                                                                                                                                                                                                                                                                                                                                                                                                                    |
| Article Type:                   | Cohort profile                                                                                                                                                                                                                                                                                                                                                                                                                                                            |
| Date Submitted by the Author:   | 21-Apr-2020                                                                                                                                                                                                                                                                                                                                                                                                                                                               |
| Complete List of Authors:       | Nissen, Alexander ; Norwegian Center for Violence and Traumatic Stress Studies<br>Cauley, Prue; Norwegian Center for Violence and Traumatic Stress Studies<br>Saboonchi, Fredrik; Red Cross University College, Department of Health Sciences; Karolinska Institute, Department of Clinical Neuroscience<br>Andersen, Arnfinn; Norwegian Center for Violence and Traumatic Stress Studies<br>Solberg, Øivind; Norwegian Center for Violence and Traumatic Stress Studies, |
| <b>Primary Subject Heading</b>: | Epidemiology                                                                                                                                                                                                                                                                                                                                                                                                                                                              |
| Secondary Subject Heading:      | Mental health, Public health                                                                                                                                                                                                                                                                                                                                                                                                                                              |
| Keywords:                       | MENTAL HEALTH, EPIDEMIOLOGY, PUBLIC HEALTH                                                                                                                                                                                                                                                                                                                                                                                                                                |
|                                 |                                                                                                                                                                                                                                                                                                                                                                                                                                                                           |

SCHOLARONE™  
Manuscripts



I, the Submitting Author has the right to grant and does grant on behalf of all authors of the Work (as defined in the below author licence), an exclusive licence and/or a non-exclusive licence for contributions from authors who are: i) UK Crown employees; ii) where BMJ has agreed a CC-BY licence shall apply, and/or iii) in accordance with the terms applicable for US Federal Government officers or employees acting as part of their official duties; on a worldwide, perpetual, irrevocable, royalty-free basis to BMJ Publishing Group Ltd ("BMJ") its licensees and where the relevant Journal is co-owned by BMJ to the co-owners of the Journal, to publish the Work in this journal and any other BMJ products and to exploit all rights, as set out in our [licence](#).

The Submitting Author accepts and understands that any supply made under these terms is made by BMJ to the Submitting Author unless you are acting as an employee on behalf of your employer or a postgraduate student of an affiliated institution which is paying any applicable article publishing charge ("APC") for Open Access articles. Where the Submitting Author wishes to make the Work available on an Open Access basis (and intends to pay the relevant APC), the terms of reuse of such Open Access shall be governed by a Creative Commons licence – details of these licences and which [Creative Commons](#) licence will apply to this Work are set out in our licence referred to above.

Other than as permitted in any relevant BMJ Author's Self Archiving Policies, I confirm this Work has not been accepted for publication elsewhere, is not being considered for publication elsewhere and does not duplicate material already published. I confirm all authors consent to publication of this Work and authorise the granting of this licence.

1  
2  
3 **Cohort profile: Resettlement in Uprooted Groups Explored (REFUGE) – A longitudinal**  
4 **study of mental health and integration in adult refugees from Syria resettled in Norway**  
5 **between 2015 and 2017**  
6  
7  
8  
9

10  
11 Alexander Nissen<sup>1</sup>, Prue Cauley<sup>1</sup>, Fredrik Saboonchi<sup>3,4</sup>, Arnfinn Andersen<sup>1</sup> &  
12 Øivind Solberg<sup>2</sup>  
13  
14

15  
16  
17  
18 1. Division for Forced Migration and Disaster research, Norwegian Centre for Violence and  
19 Traumatic Stress Studies, Oslo, Norway  
20

21  
22 2. Division for Implementation and Treatment Research, Norwegian Centre for Violence and  
23 Traumatic Stress Studies, Oslo, Norway  
24

25  
26 3. Department of Health Sciences, Red Cross University College, Stockholm, Sweden  
27

28  
29 4. Division of Insurance Medicine, Department of Clinical Neuroscience, Karolinska  
30 Institutet, Stockholm, Sweden  
31  
32

33  
34  
35  
36  
37  
38  
39  
40 Corresponding author:

41  
42 M.D., M.Sc. Alexander Nissen

43  
44 P.box 181 Nydalen, 0409 Oslo, Norway

45  
46 Email: a.f.w.nissen@nkvts.no

47  
48 Phone: +47 91623650  
49  
50  
51  
52  
53

54 **KEYWORDS:** Refugees; cohort; Syria; mental health; integration  
55

56 **WORD COUNT** (excluding title page, abstract, references, tables and figures): 4542  
57  
58  
59  
60

## ABSTRACT

**Purpose:** In the field of forced migration and mental health research, longitudinal studies with large sample sizes and rigorous methodology are lacking. Therefore, the REFUGE-study was initiated in order to enhance current knowledge on mental health, quality of life and integration among adult refugees from Syria resettled in Norway. The main aims of the study are to investigate risk and protective factors for mental ill health in a longitudinal perspective; to trace mental health trajectories and investigate important modifiers of these trajectories; and to explore the association between mental health and integration in the years following resettlement. The aims will be pursued by combining data from a longitudinal, three-wave questionnaire survey with data from population-based registries on education; work participation and sick-leave; health-care utilization; and drug prescription. The goal is to incorporate the data in an internationally shared database, the REFUGE-database, where collaborating researchers may access and use data from the study as well as deposit data from similar studies.

**Participants:** Adult ( $\geq 18$  years), Syrian citizens who arrived in Norway as quota refugees, asylum seekers or through Norway's family reunion program between January 1, 2015 and December 31, 2017. Of the initial 9,990 sampled individuals for the first wave of the study (REFUGE-I), 8,752 were reached by post or telephone and 902 responded (response rate = 10.3%).

**Findings to date:** None published

**Future plans:** The REFUGE-cohort study will conduct two additional data collections (2020 and 2021). Furthermore, questionnaire data will be linked to population-based registries after all three waves of data collection have been completed. Registry data will be obtained for time-periods both prior to and after the survey data collection points. Finally, pending ethics approval, we will begin the process of merging the Norwegian REFUGE-cohort with existing datasets in Sweden, establishing the extended REFUGE-database.

**Registration:** ClinicalTrials.gov database (NCT03742128).

### Strengths and Limitations

- The study features a large sample of both male and female adult refugees from Syria who were resettled in a high-income country between 2015 and 2017.
- Study participants were selected through random sampling from a population-based source population identified using Norway's National Registry – i.e. all refugees from Syria residing in Norway who met inclusion criteria had equal probability of selection.
- The study will use a three-wave survey design which will enable longitudinal tracking of self-reported mental health and other key measures
- The study will link data from the three-wave, questionnaire survey to data in Norway's large, population-based registries on education, work participation and sick-leave, health-care utilization and drug prescription; as well as to other datasets/data sources within the EU.
- Initial data collection yielded a low response rate, despite extensive recruitment efforts.

## INTRODUCTION

The adversities of forced migration make the current population of more than 70 million forcibly displaced people especially vulnerable[1]. Here, the concept of “vulnerability” refers to refugees’ heightened exposure to potentially traumatic events (PTEs) such as torture, war and/or violence-related traumas prior to or during forced migration, as well as experiences of post-migration socioeconomic hardships and social isolation. Together, these risk factors create a vulnerability that constitutes a profound risk for mental ill health and reduced quality of life with potential long-lasting effects[2–4].

Given the aforementioned high burden of mental ill health in refugee populations and the centrality of *functional impairment* in the diagnostic frameworks for PTSD, anxiety and depression in the main diagnostic manuals[5,6], few studies have looked at integration in relation to mental health within refugee populations. The studies available show that general health problems, as well as symptoms of PTSD and depression, are adversely associated with economic and social integration[7,8], with one study finding mental health to be a mediator between post-migration stressors and integration[9]. Still, longitudinal studies with large sample sizes and rigorous methodology are lacking and the socio-political controversy that is linked to the topic of refugee health often influences the measures and investigative methods used[10]. Therefore, studies that bridge these gaps are warranted in order to better understand the resettlement stressors and the mental health burden of refugees resettled in a host country in order to inform policy and practice.

Accordingly, the REFUGE-study was initiated in order to enhance current knowledge on mental health and quality of life among adult refugees from Syria resettled in Norway following the 2011 outbreak of the civil war in Syria. The main aims of the study are to investigate risk and protective factors for mental ill health in a longitudinal perspective; to trace mental health trajectories and investigate important modifiers of these trajectories; and to explore the association between mental health and integration in the years following resettlement. This will be done through a planned longitudinal, three-wave survey design linked to population-based registries in Norway on education; work participation and sick-leave; health-care utilization; and drug prescription.

A broader, secondary aim is to extend the REFUGE-study beyond Norway’s borders, through collaboration between the REFUGE-study group in Norway and partner institutions in Sweden and the United Kingdom, forming the REFUGE-consortium. This work, pending

1  
2  
3 ethics approval, will include setting up and servicing a shared database in order to harness the  
4 research potential that lies within the existing datasets on resettled refugees from Syria in  
5 Norway and Sweden ( $N > 4,500$ ).  
6  
7

8  
9 A tertiary, long-term goal is to further expand the REFUGE-database by encouraging  
10 researchers in other countries to complete similar, nation-wide data-collections that can be  
11 added to the existing database. In turn, given the extensive number of included participants,  
12 the REFUGE-database will have ample opportunities to provide unique cross-country,  
13 intersectional, comparative analyses that can provide robust explanatory models of refugees'  
14 health and social outcomes, in turn informing social policy and practice.  
15  
16  
17  
18

19  
20 At the time of writing this cohort profile, the first wave of the three-wave survey design has  
21 been completed. The REFUGE-study is registered in the ClinicalTrials.gov database  
22 (NCT03742128).  
23  
24  
25  
26  
27  
28  
29

## 30 COHORT DESCRIPTION

### 31 Setting

32  
33 The study is set in Norway, a high-income country, with a population of 5.3 million  
34 people[11]. Approximately 4.5% of the Norwegian population has a refugee  
35 background[12]. The Directorate of Immigration (UDI) is the central agency in the Norwegian  
36 immigration administration. UDI facilitates lawful immigration and administrates applications  
37 for residency and citizenship, including asylum applications[for details, please see 13]. Since  
38 its onset in 2011, the civil war in Syria has forced more than 6.5 million Syrian citizens to flee  
39 the country as refugees, of which an estimated one million have reached Europe, excluding  
40 Turkey[14,15]. At the time of primary data collection, forced migrants from Syria therefore  
41 constituted the largest group of newly resettled refugees and asylum-seekers in Norway.  
42  
43  
44  
45  
46  
47  
48  
49

### 50 Eligibility

51  
52 The source population for the REFUGE-study cohort was defined by the following three  
53 criteria: Potential participants had to be (1) Syrian citizens who arrived in Norway as either a  
54 resettlement refugee (quota refugee), an asylum seeker, or through Norway's family reunion  
55 program, (2) granted permanent or temporary residency and registered with an address in  
56  
57  
58  
59  
60

1  
2  
3 Norway between January 1, 2015 and December 31, 2017, and finally, (3) 18 years of age or  
4 older at the time the sample was drawn from the source population.  
5

6  
7 These criteria were sent to the Norwegian National Registry (NNR) who generated a list of  
8 potential participants (N = 14,350) from their database consisting of all individuals residing in  
9 Norway at that time. A simple, random, equal probability sample of 9,990 Syrian citizens was  
10 then drawn in August, 2018.  
11  
12  
13

### 14 15 16 **Study preparation and promotion**

17 In initial stages of development, approximately a year before the commencement of the data  
18 collection, an early version of the questionnaire was tested in a reception centre. Arabic  
19 speaking asylum seekers filled out the survey and participated in focus groups with the aim of  
20 testing and tailoring the questionnaire for length, comprehension and cultural sensitivity.  
21 Several amendments to the questionnaire then followed as a result of the feedback obtained in  
22 these focus groups. Findings from this preliminary stage also prompted the creation of a user  
23 reference-group, consisting of six Syrians living in Norway. This user reference-group served  
24 as an advisory board throughout the planning, development and implementation of the study.  
25  
26  
27  
28  
29  
30  
31

32  
33 Additionally, prior to data collection, a number of strategies were employed in order to inform  
34 potential participants about the study and boost participation. Key persons within the  
35 community were identified and contacted in order to discuss ways to explain and promote the  
36 study through social media and other channels. Based on input from these sources, several  
37 short, animated movies were made in Arabic in order to explain why the study was being  
38 undertaken, what participation entailed, and how key issues in research, such as informed  
39 consent, confidentiality, data handling, and privacy rights, would be handled. REFUGE web  
40 and Facebook pages were also created in both Arabic and Norwegian, conveying the same  
41 information as the movies, in more detail. The Facebook page, with Q&A, was continuously  
42 supervised and moderated by a native Arabic speaker.  
43  
44  
45  
46  
47  
48  
49  
50

51  
52 In order to reach a wider range of potential participants, in-person and paper-based  
53 dissemination of information also took place. Information and Q&A sessions at Adult  
54 Education centers (VOs) in Norway's larger cities were held by the REFUGE team members,  
55 including an Arabic interpreter from Syria who was involved in the study from the beginning.  
56 Information about the study was also sent to local community refugee centers throughout  
57  
58  
59  
60



1  
2  
3 Norway. These centers work with refugees on a daily basis, assisting and counselling them on  
4 various matters related to the integration process into Norway.  
5  
6  
7

### 8 **Sampling**

9  
10 The first wave of the REFUGE-study (REFUGE-I) was launched at the end of November  
11 2018. Each of the 9,990 sampled Syrian refugees were sent an envelope containing the study  
12 questionnaire, a cover letter in Arabic and a prepaid return envelope. The cover letter  
13 explained the purpose and voluntary nature of the study, what participation entailed, and  
14 issues surrounding confidentiality and data handling. It also included a space for willing  
15 participants to provide written informed consent in the form of a signature. Moreover, due to  
16 the sensitive nature of some parts of the questionnaire, the cover letter explicitly stated that  
17 *“some questions in the questionnaire might be difficult to answer, cause slight discomfort or*  
18 *might bring up difficult memories from your past or flight to Norway”*. It also included  
19 contact details to clinical back-up in the form of a psychiatrist at NKVTS, stating that  
20 participants could contact this person in order to receive information and support in accessing  
21 professional medical help in Norway. Out of hours and emergency service contact details  
22 were also included.  
23  
24  
25  
26  
27  
28  
29  
30  
31  
32  
33

34 The address list provided by the Norwegian National Registry (NNR) included 1,235  
35 addresses where the addressee was either not found or could not be reached. These potential  
36 participants were never found and therefore excluded from the study. Current rules for  
37 conducting research surveys in Norway prohibit more than one reminder being sent out to  
38 non-responders to encourage participation. Based on a small pilot project testing the use of  
39 telephone reminders with Arabic speaking personnel conducted on 530 non-responders in the  
40 sample, it was decided that telephone reminders would be used for all non-responders with an  
41 available telephone number (N = 5,675). Telephone contact was made with less than half of  
42 this group (N = 2,087). Table S1 in the supplementary material summarizes the answers given  
43 by this group when asked to participate. The telephone reminders were conducted in late  
44 March and early April, 2019. A postal reminder which included the questionnaire, the cover  
45 letter with informed consent and a prepaid return envelope was also sent out to non-  
46 responders who were not reached via telephone (N = 5,000). The postal reminder was sent out  
47 in early June, 2019. Figure 1 summarizes the flow of participants through REFUGE-I, and  
48 Table 1 provides comparative statistics on participants in REFUGE-I vs. the source and  
49 sample population. Of the initial 9,990 sampled individuals, 8,752 were reached either by post  
50  
51  
52  
53  
54  
55  
56  
57  
58  
59  
60

1  
2  
3 or telephone and 902 returned the questionnaire (response rate = 10.3% if non-contacts are  
4 excluded). Of the 902 responders, 665 (73.2%) were willing to take part in later waves of the  
5 study.  
6  
7  
8  
9

10 According to the original plan registered at ClinicalTrials.gov, data collection was planned to  
11 run for about 6-8 weeks. However, due to a very low response rate at the time of the planned  
12 closing date in mid-January 2019, the study was extended, and the final closing date was in  
13 early September 2019. All procedures concerning the selection and recruitment of  
14 participants, including consent procedures, were approved by the Regional Committees for  
15 Medical and Health Research Ethics (REC) - Region South East (A) in Norway. Reference  
16 number 2017/1252.  
17  
18  
19  
20  
21  
22  
23

24 The administration and logistics of the survey was handled by the research and consulting  
25 firm, Ipsos, which has extensive experience with and infrastructure for these types of surveys.  
26 Ipsos is also responsible for securely storing participants' Norwegian identity numbers so that  
27 longitudinal tracking of individuals and linking to registry data is possible. The identity  
28 numbers are unknown to all researchers involved.  
29  
30  
31  
32  
33  
34  
35  
36  
37  
38  
39  
40  
41  
42  
43  
44  
45  
46  
47  
48  
49  
50  
51  
52  
53  
54  
55  
56  
57  
58  
59  
60

Table 1. Demographic characteristics of participants vs. the source and sample populations

|                                         | Source population<br>N = 14,350 |        | Sample population<br>N = 9,990 |        | Participants<br>N = 902 |        | Participants willing to take part<br>in subsequent surveys<br>N = 665 |        |
|-----------------------------------------|---------------------------------|--------|--------------------------------|--------|-------------------------|--------|-----------------------------------------------------------------------|--------|
|                                         | n                               | (%)    | n                              | (%)    | n                       | (%)    | n                                                                     | (%)    |
| <b>Gender</b>                           |                                 |        |                                |        |                         |        |                                                                       |        |
| Female                                  | 5,117                           | (35.7) | 3,552                          | (35.5) | 320                     | (35.5) | 236                                                                   | (35.5) |
| Male                                    | 9,233                           | (64.3) | 6,446                          | (64.5) | 582                     | (64.5) | 429                                                                   | (64.5) |
| <b>Age<sup>1</sup></b>                  |                                 |        |                                |        |                         |        |                                                                       |        |
| 18-29                                   | 6,135                           | (42.8) | 4,265                          | (42.7) | 197                     | (21.8) | 148                                                                   | (22.2) |
| 30-39                                   | 4,769                           | (33.2) | 3,315                          | (33.1) | 310                     | (34.4) | 218                                                                   | (32.8) |
| 40-49                                   | 2,263                           | (15.8) | 1,604                          | (16.0) | 230                     | (25.5) | 173                                                                   | (26.0) |
| 50-64                                   | 1,034                           | (7.2)  | 721                            | (7.2)  | 145                     | (16.1) | 112                                                                   | (16.9) |
| >64                                     | 149                             | (1.0)  | 95                             | (1.0)  | 20                      | (2.2)  | 14                                                                    | (2.1)  |
| <b>Civil status<sup>1</sup></b>         |                                 |        |                                |        |                         |        |                                                                       |        |
| Unmarried                               | 5,879                           | (41.0) | 4,047                          | (40.5) | 236                     | (26.1) | 176                                                                   | (26.5) |
| Married                                 | 7,873                           | (54.8) | 5,545                          | (55.5) | 595                     | (66.0) | 433                                                                   | (65.1) |
| Other <sup>2</sup>                      | 598                             | (4.2)  | 398                            | (4.0)  | 71                      | (7.9)  | 56                                                                    | (8.4)  |
| <b>Year granted residency in Norway</b> |                                 |        |                                |        |                         |        |                                                                       |        |
| 2015                                    | 2,993                           | (20.8) | 2,081                          | (20.8) | N/A <sup>3</sup>        |        | N/A <sup>3</sup>                                                      |        |
| 2016                                    | 7,513                           | (52.4) | 5,267                          | (52.7) |                         |        |                                                                       |        |
| 2017                                    | 3,844                           | (26.8) | 2,652                          | (26.5) |                         |        |                                                                       |        |

<sup>1</sup> Age and civil status for the two participating groups was based on participants' answers in the questionnaire.

<sup>2</sup> Includes widow(er), separated, divorced

<sup>3</sup> Individual-level data on the year residency was granted was not provided by the Norwegian National Registry.

## METHODS

### Quantitative measures

Three waves of questionnaire surveys are planned for the REFUGE-study (REFUGE-I, II, and III). Collection for REFUGE-I has already been completed as described above. REFUGE-II and III are scheduled to be carried out roughly one and two years after REFUGE-I, respectively. The questionnaire used will be very similar for all three waves of the study. Key variables are highlighted in Table 2 below.

Table 2. Summary of key measures used in the longitudinal, three-wave, questionnaire survey

|                                                                                             | Measure used <sup>1</sup>                                         | Comments                                                                                                                         |
|---------------------------------------------------------------------------------------------|-------------------------------------------------------------------|----------------------------------------------------------------------------------------------------------------------------------|
| Symptoms of PTSD                                                                            | Harvard Trauma Questionnaire, HTQ                                 | The first 16 items on trauma symptoms in section IV will be used                                                                 |
| Symptoms of anxiety and depression                                                          | Hopkins Symptom Checklist, HSCL-25                                | The first 10 of the total 25 items will be used to measure symptoms of anxiety and the last 15 to measure symptoms of depression |
| Quality of life                                                                             | World Health Organization Quality of Life assessment, WHOQOL-BREF | The scale consists of 26 items and all will be included                                                                          |
| Somatic pain                                                                                | Questions adapted from the Tromsø Study                           | 10 questions will be used, 5 concerning muscle/joint pain and 5 concerning more general somatic pain                             |
| Perceived general health                                                                    | European Social Survey                                            | 2 items from the scale will be included                                                                                          |
| Sleep difficulties                                                                          | The Bergen Insomnia Scale                                         | The scale consists of 6 items and all will be included                                                                           |
| Potentially traumatic experiences <i>before</i> the flight from Syria (pre-migratory PTEs)  | The Refugee Trauma History Checklist, RTHC                        | The scale consists of 8 items and all will be included                                                                           |
| Potentially traumatic experiences <i>during</i> the flight from Syria (peri-migratory PTEs) | The Refugee Trauma History Checklist, RTHC                        | The scale consists of 8 items and all will be included                                                                           |
| Post-migration stressful experiences                                                        | Post-migration stress scale                                       | The scale consists of 24 items and all will be included                                                                          |
| Social support                                                                              | ENRICHD Social Support Inventory                                  | The first 6 items of the scale will be included                                                                                  |

<sup>1</sup> Further information on the measures used can be found in the ClinicalTrials.gov database where the study is registered (NCT03742128)

Other important measures in the questionnaire include an item regarding the re-experiencing of traumatic events or intrusive memories, which asks whether the participant experiences this, how often, and how distressing it is. Another item asks about the daily effects of chronic physical illness, disability, infirmity or mental health problem(s). Lastly, as an addition to the social support scale (ESSI), three items have been included to assess how easily the

1  
2  
3 respondent can get help from neighbours, how many people the participant can count on when  
4 serious problems occur, and how much concern people show in what the respondent is doing.  
5  
6  
7

## 8 Background and sociodemographic variables

9  
10 Important background and demographic variables include: gender, age, marital status, number  
11 of children, refugee status upon arrival (i.e. asylum seeker, quota refugee, family reunion, or  
12 other), whether the participant fled Syria alone or with a partner, family and/or friends,  
13 whether other family members had already settled in Norway prior to refugee's arrival in the  
14 country, time elapsed between when a participant fled Syria and arrived in Norway, and time  
15 in Norway prior to participating in the study. Tables 3 and 4 provide descriptive statistics on  
16 participants on the aforementioned variables from the first wave of data collection. The  
17 number of participants with missing values across variables can be interpreted from the table  
18 (applies for all tables). Additional sociodemographic data collected include: smoking; alcohol  
19 and drug use; employment status (*Do you currently hold paid employment in Norway?*  
20 *Yes/No*); job satisfaction; self-reported competence in English and Norwegian language; and  
21 years of education completed (*How many years of schooling do you have? No education/1-5*  
22 *years/6-9 years/10-12 years/More than 12 years*). Further details on the scales used, their  
23 psychometric properties and how variables will be handled in analyses can be found in the  
24 ClinicalTrials.gov database.  
25  
26  
27  
28  
29  
30  
31  
32  
33  
34  
35  
36  
37

## 38 Integration

39 Previous research has highlighted that active participation in social contexts promotes mental  
40 health, quality of life and beneficial health behaviours[16–18]. The REFUGE-study  
41 approaches integration in agreement with the primary domains suggested by Ager and  
42 Strang[19], which are: employment and labour market, school and education attainments,  
43 housing, and health and health care. Furthermore, and in line with suggestions by Castles[20]  
44 and Niemi et al[21], we consider civic and social participation/social exclusion to be central  
45 indicators of refugees' access to and active involvement in important spheres of the host  
46 societies, and these markers thus indicate a central component of social capital[22].  
47  
48  
49  
50  
51  
52  
53  
54  
55  
56  
57  
58  
59  
60

Table 3. Descriptive statistics on participating refugees from Syria

|                                                   | Participants, N = 902 |         | Participants willing to take part in longitudinal questionnaire survey, N = 665 |         |
|---------------------------------------------------|-----------------------|---------|---------------------------------------------------------------------------------|---------|
|                                                   | n                     | (%)     | n                                                                               | (%)     |
| <b>Number of children</b>                         |                       |         |                                                                                 |         |
| I do not have children                            | 271                   | (31.6)  | 213                                                                             | (33.5)  |
| 1                                                 | 63                    | (7.4)   | 44                                                                              | (6.9)   |
| 2                                                 | 125                   | (14.6)  | 86                                                                              | (13.5)  |
| 3                                                 | 139                   | (16.2)  | 103                                                                             | (16.2)  |
| 4                                                 | 101                   | (11.8)  | 78                                                                              | (12.3)  |
| 5                                                 | 77                    | (9.0)   | 53                                                                              | (8.3)   |
| 6 or more                                         | 81                    | (9.5)   | 59                                                                              | (9.3)   |
| Total                                             | 857                   | (100.0) | 636                                                                             | (100.0) |
| <b>Education<sup>3</sup></b>                      |                       |         |                                                                                 |         |
| 9 years or less                                   | 394                   | (44.7)  | 281                                                                             | (43.0)  |
| 10-12 years                                       | 158                   | (17.9)  | 116                                                                             | (17.8)  |
| More than 12 years                                | 330                   | (37.4)  | 256                                                                             | (39.2)  |
| Total                                             | 882                   | (100.0) | 653                                                                             | (100.0) |
| <b>Refugee status upon arrival</b>                |                       |         |                                                                                 |         |
| Asylum seeker                                     | 454                   | (52.5)  | 325                                                                             | (51.0)  |
| Quota refugee                                     | 273                   | (31.6)  | 209                                                                             | (32.8)  |
| Family reunion                                    | 133                   | (15.4)  | 100                                                                             | (15.7)  |
| Other                                             | 4                     | (0.5)   | 3                                                                               | (0.5)   |
| Total                                             | 864                   | (100.0) | 637                                                                             | (100.0) |
| <b>Arrived in Norway...</b>                       |                       |         |                                                                                 |         |
| ...alone                                          | 247                   | (28.1)  | 182                                                                             | (28.0)  |
| ...with friends, but no family                    | 56                    | (6.4)   | 43                                                                              | (6.6)   |
| ...with family                                    | 576                   | (65.5)  | 425                                                                             | (65.4)  |
| Total                                             | 879                   | (100.0) | 650                                                                             | (100.0) |
| <b>Family member previously settled in Norway</b> |                       |         |                                                                                 |         |
| No                                                | 594                   | (68.3)  | 440                                                                             | (68.4)  |
| Yes                                               | 276                   | (31.7)  | 203                                                                             | (31.6)  |
| Total                                             | 870                   | (100.0) | 643                                                                             | (100.0) |
| <b>Length of flight<sup>1</sup></b>               |                       |         |                                                                                 |         |
| Less than 3 months                                | 165                   | (33.7)  | 124                                                                             | (33.9)  |
| 3 to 12 months                                    | 61                    | (12.4)  | 42                                                                              | (11.5)  |
| 1 to 2 years                                      | 59                    | (12.0)  | 43                                                                              | (11.7)  |
| 2 to 3 years                                      | 77                    | (15.7)  | 56                                                                              | (15.3)  |
| More than 3 years                                 | 128                   | (26.1)  | 101                                                                             | (27.6)  |
| Total                                             | 490                   | (100.0) | 366                                                                             | (100.0) |
| <b>Residency time in Norway<sup>2</sup></b>       |                       |         |                                                                                 |         |
| Less than 2 years                                 | 104                   | (16.8)  | 83                                                                              | (17.9)  |
| Between 2 and 3 years                             | 151                   | (24.4)  | 120                                                                             | (25.9)  |
| Between 3 and 4 years                             | 289                   | (46.7)  | 209                                                                             | (45.1)  |
| More than 4 years                                 | 75                    | (12.1)  | 51                                                                              | (11.0)  |
| Total                                             | 619                   | (100.0) | 463                                                                             | (100.0) |

<sup>1</sup> Estimated through the number of days elapsed between a refugee reportedly left Syria and arrived in Norway

<sup>2</sup> Estimated through the number of days elapsed between a refugee reportedly arrived in Norway and the date he/she returned the questionnaire

Table 4. Potentially traumatic experiences prior to and during the flight from Syria among participants

|                                                                                                                           |     | Participants<br>N = 902 <sup>1</sup> |        | Participants willing<br>to take part in<br>longitudinal survey<br>N = 665 <sup>1</sup> |        |
|---------------------------------------------------------------------------------------------------------------------------|-----|--------------------------------------|--------|----------------------------------------------------------------------------------------|--------|
|                                                                                                                           |     | n                                    | (%)    | n                                                                                      | (%)    |
| <b>Before you left your home, have you personally faced any of the following situations or events:</b>                    |     |                                      |        |                                                                                        |        |
| War at close quarters                                                                                                     | No  | 41                                   | (4.7)  | 31                                                                                     | (4.8)  |
|                                                                                                                           | Yes | 840                                  | (95.3) | 618                                                                                    | (95.2) |
| Forced separation from family or close friends                                                                            | No  | 324                                  | (40.3) | 235                                                                                    | (39.8) |
|                                                                                                                           | Yes | 480                                  | (59.7) | 355                                                                                    | (60.2) |
| Loss or disappearance of family member(s) or loved one(s)                                                                 | No  | 287                                  | (35.3) | 213                                                                                    | (35.5) |
|                                                                                                                           | Yes | 526                                  | (64.7) | 387                                                                                    | (64.5) |
| Physical violence or assault                                                                                              | No  | 554                                  | (70.5) | 400                                                                                    | (69.3) |
|                                                                                                                           | Yes | 232                                  | (29.5) | 177                                                                                    | (30.7) |
| Witnessing physical violence or assault                                                                                   | No  | 304                                  | (36.9) | 203                                                                                    | (33.5) |
|                                                                                                                           | Yes | 520                                  | (63.1) | 403                                                                                    | (66.5) |
| Torture                                                                                                                   | No  | 567                                  | (72.8) | 410                                                                                    | (71.6) |
|                                                                                                                           | Yes | 212                                  | (27.2) | 163                                                                                    | (28.4) |
| Sexual violence                                                                                                           | No  | 710                                  | (93.3) | 518                                                                                    | (92.7) |
|                                                                                                                           | Yes | 51                                   | (6.7)  | 41                                                                                     | (7.3)  |
| Other frightening situation(s) where you felt your life was in danger                                                     | No  | 103                                  | (12.0) | 74                                                                                     | (11.7) |
|                                                                                                                           | Yes | 754                                  | (88.0) | 561                                                                                    | (88.3) |
| <b>After you left your home, during your flight, have you personally faced any of the following situations or events:</b> |     |                                      |        |                                                                                        |        |
| War at close quarters                                                                                                     | No  | 408                                  | (49.3) | 310                                                                                    | (50.7) |
|                                                                                                                           | Yes | 420                                  | (50.7) | 302                                                                                    | (49.3) |
| Forced separation from family or close friends                                                                            | No  | 412                                  | (52.5) | 298                                                                                    | (51.5) |
|                                                                                                                           | Yes | 373                                  | (47.5) | 281                                                                                    | (48.5) |
| Loss or disappearance of family member(s) or loved one(s)                                                                 | No  | 422                                  | (53.8) | 312                                                                                    | (53.6) |
|                                                                                                                           | Yes | 362                                  | (46.2) | 270                                                                                    | (46.4) |
| Physical violence or assault                                                                                              | No  | 638                                  | (83.6) | 467                                                                                    | (83.5) |
|                                                                                                                           | Yes | 125                                  | (16.4) | 92                                                                                     | (16.5) |
| Witnessing physical violence or assault                                                                                   | No  | 566                                  | (72.6) | 405                                                                                    | (70.7) |
|                                                                                                                           | Yes | 214                                  | (27.4) | 168                                                                                    | (29.3) |
| Torture                                                                                                                   | No  | 657                                  | (86.8) | 481                                                                                    | (87.1) |
|                                                                                                                           | Yes | 100                                  | (13.2) | 71                                                                                     | (12.9) |
| Sexual violence                                                                                                           | No  | 722                                  | (97.3) | 529                                                                                    | (97.2) |
|                                                                                                                           | Yes | 20                                   | (2.7)  | 15                                                                                     | (2.8)  |
| Other frightening situation(s) where you felt your life was in danger                                                     | No  | 350                                  | (42.8) | 258                                                                                    | (42.9) |
|                                                                                                                           | Yes | 468                                  | (57.2) | 344                                                                                    | (57.1) |

<sup>1</sup> Not all participants answered all items, therefore, the total number of answers for a given item may be less than 902 and 665 for the two groups, respectively.

1  
2  
3 Congruent with the domains of integration suggested by Ager and Strang, the study will use  
4 data from the Norwegian national registries in order to measure integration for consenting  
5 participants. Specifically, the study plans to obtain data from the National education database  
6 (NUBD) which contains data on educational participation and achievements; the Norwegian  
7 registries on employment and sick-leave which contain data on employment and doctor-  
8 certified sick-leave; the Norwegian Patient Registry (NPR) and the Norwegian Registry for  
9 Primary Health Care (NRPHC) which contain data on the utilization of the health care  
10 system; and, finally, the Norwegian Prescription Database (NorPD) which contains data about  
11 dispensed drugs. All of the registries contain individual-level data, and the study intends to  
12 merge a participant's longitudinal survey data with that participant's registry data at in order  
13 to investigate how mental health is associated with these measures of integration.  
14  
15  
16  
17  
18  
19  
20  
21  
22

23 Integration will also be investigated through the questionnaire data. Social integration is  
24 explored through measures of post migratory stress (e.g. "Often felt excluded or isolated in  
25 the Norwegian society", "Often being unable to buy necessities"), social support (ESSI) and  
26 quality of life. Furthermore, the questions on how easily the participant can get help from  
27 neighbours; how many people the participant can count on when serious problems occur; and  
28 how much concern people show in what the participant is doing will also be used as measures  
29 of integration. In the coming data collection waves, a scale measuring social participation will  
30 also be included. This scale will be incorporated both in the quantitative part of the study and  
31 as a specific topic within the planned qualitative interviews and focus groups.  
32  
33  
34  
35  
36  
37  
38  
39  
40

#### 41 Analysis

42 The study's registration in the ClinicalTrials.gov database presents detailed analytic plans for  
43 the first phase of the REFUGE-study (REFUGE-I). Broad analytic questions to be  
44 investigated in the later phases of the REFUGE-study include: i) what are important risk and  
45 protective factors for mental ill health; ii) what are the mental health trajectories and which  
46 factors appear to impact these trajectories; iii) how is mental health associated with the  
47 measures of integration used in the present study and what are important mediators and  
48 modifiers in the relationship between mental health and integration.  
49  
50  
51  
52  
53  
54  
55  
56

#### 57 Qualitative measures

58 In addition to the quantitative aspect of the REFUGE-study, qualitative analyses are also  
59 planned for future waves of the study, comprising interviews and focus group sessions.  
60



1  
2  
3 Questions regarding participation and non-participation will be included in interview guides.  
4 Further themes for the interview and focus group guides are in development, and directions  
5 will be refined as further findings emerge from the existing quantitative dataset.  
6  
7  
8  
9

### 10 **Patient and public involvement**

11 The REFUGE-study was supported throughout the development process by members of the  
12 community. Focus groups were held in the early stages of development in order to tailor the  
13 questionnaire, and a user reference group was created in order to act as an advisory group,  
14 providing insight during the planning, development and implementation stages. Community  
15 members were also involved in the recruitment process, providing insight and advice on the  
16 dissemination of information about the study through social media.  
17  
18  
19  
20  
21  
22  
23

### 24 **Findings to date**

25 The first wave of data collection in Norway has been completed. At the time of writing, no  
26 findings have been published.  
27  
28  
29  
30

### 31 **Strengths and limitations**

32 The REFUGE-study has several important strengths, both in terms of methodology, and in  
33 value of the resulting data. Firstly, the study population was randomly selected from a large  
34 source population consisting of all adult refugees from Syria residing in Norway who met the  
35 study's eligibility criteria, obtained from the Norwegian National Registry. In comparison,  
36 many of the previous studies on mental health in refugee populations rely on convenience  
37 sampling. Further, the use of a three-wave longitudinal survey design will allow for better  
38 exploration of cause-effect relationships between variables in the study, than purely cross-  
39 sectional data. In addition, research on the association between refugee mental health and  
40 integration is scarce. By linking longitudinal questionnaire data to registry data on education-,  
41 work- and health-related parameters, the study could make important contributions to the  
42 dearth of evidence on this topic. Also, combining self-report data with registry data from  
43 well-established national registries may reduce common method bias. Research on refugee  
44 mental health to date relies heavily on self-report data. A further strength of the study is that  
45 most of the key variables are measured using well-documented and validated scales. Review  
46 articles on refugee mental health frequently highlight the large degree of variance in terms of  
47 methods used and call for increased focus on methodological issues. Lastly, the close  
48 collaboration between the REFUGE-study group in Norway and its main collaborating  
49  
50  
51  
52  
53  
54  
55  
56  
57  
58  
59  
60

1  
2  
3 partner, the Red Cross University College in Sweden, will offer ample opportunities to  
4 compare Syrian refugee populations in two different countries, as both projects use similar  
5 measures and have agreed to collaborate on and combine datasets.  
6  
7

8  
9 An important potential weakness of REFUGE-I is that less than 11 percent of the sampled  
10 population participated in the study. This could lead to selection bias problems. As can be  
11 seen from Table 1, participants are very similar to the source and sample population in terms  
12 of gender, though the proportion of young and unmarried refugees are notably smaller in the  
13 participating group. Table S2 in the supplementary material shows that the geographical  
14 distribution across Norway's 18 counties was very similar for participants and the sample  
15 population. In terms of residency status, participants had the same proportional breakdown as  
16 the sample population: 95% had temporary residency in Norway at the time of the survey and  
17 5% had permanent residency (result not shown in tables). In order to further explore selection  
18 bias, we investigated whether there were any trends across demographic and background  
19 variables in terms of when the surveys were filled out and returned. Given that the survey was  
20 open for nine months, exploring the timing of participation may give some indication of  
21 different groups' willingness to participate, and, by extension, suggest which groups may be  
22 over- and underrepresented among participants. While the most common reason for non-  
23 participation was unwillingness, a potentially significant contributing factor to the low  
24 participation rate may be the presence of low literacy rates within the sampled population. As  
25 shown in Figure 1, 49 participants stated an inability to read Arabic to explain non-  
26 participation, and it is conceivable that this was the case for a number of sampled individuals  
27 who failed to return the survey. Regrettably, current ethical laws in Norway do not allow for  
28 an online-based questionnaire where Arabic voice-over could be utilized. Therefore, potential  
29 participants with low reading and writing proficiency regrettably were effectively excluded.  
30  
31  
32  
33  
34  
35  
36  
37  
38  
39  
40  
41  
42  
43  
44  
45  
46

47 Table S3 in the supplementary material shows the distribution of demographic variables  
48 across 4 different time-periods of participation (i.e. the 9-month period the survey was open  
49 was divided into 4 shorter periods), and Table S4 shows the distribution across background  
50 characteristics related to refugee status and history. Differences in distributions across  
51 time-periods were tested with chi-square test of equal proportion. As can be seen from the  
52 tables, there was weak or no evidence that the timing of participation was related to  
53 demographic and/or background variables with three exceptions. First, there was very clear  
54 evidence that residency time in Norway was negatively associated with early participation -  
55  
56  
57  
58  
59  
60

1  
2  
3 i.e. the longer a refugee's residency time in Norway, the less likely (s)he was to participate in  
4 the first time-periods following study launch ( $p < 0.001$ ), relatively speaking. There was also  
5 very strong statistical evidence ( $p < 0.001$ ) that pre-migratory stress was associated with the  
6 timing of participation, though the underlying trend was not easily interpretable. Refugees  
7 with the highest number of potentially traumatic pre-flight experiences (PTEs) were more  
8 likely to participate in the early periods after study launch (relatively speaking). This was not  
9 true, however, for the refugee group with the second to most PTEs. Lastly, there was  
10 moderate evidence that refugee status upon arrival was association with the timing of  
11 participation ( $p = 0.01$ ), though no clear underlying pattern was evident.

12  
13 Another limitation of the present study is the survey design used to attain prevalences of  
14 depression, anxiety and PTSD symptoms. Short-form questionnaires, while efficient, do not  
15 capture all aspects of the measured constructs. Additionally, recent studies have suggested  
16 that when self-report measures are used, resulting prevalences tend to be higher than when  
17 using diagnostic interviews[23,24]. However, the questionnaires used in the current study to  
18 measure PTSD, anxiety and depression have been validated for use within the studied  
19 population and their use allows for many more participants to be reached, improving the  
20 generalizability of the findings.

21  
22 Perhaps the most significant learning opportunity provided by the present study thus far has  
23 been the challenging recruitment process. Although extensive recruitment efforts were  
24 employed, the participation rate for REFUGE-I was just above 10%. As noted previously,  
25 methods to boost recruitment involved the utilisation of contacts within the community,  
26 dedicated Facebook and web pages in Arabic, and Q&A sessions held at Adult Education  
27 centres in Norway's major cities, as well as the dissemination of information about the project  
28 online through purpose-built, animated videos and newsletters. Researchers aiming to gather  
29 data from similar populations would do well to ensure that sufficient time and resources are  
30 dedicated to the recruitment phase of the study.

### 31 32 33 34 35 36 37 38 39 40 41 42 43 44 45 46 47 48 49 50 51 **Future plans**

52 The REFUGE-cohort study will conduct a second wave of data collection in 2020. A third  
53 wave of data collection is planned in 2021, pending funding. Furthermore, we plan to link  
54 questionnaire data to Norwegian registry data after all three waves of data collection have  
55 been completed. Registry data will be obtained for time-periods both prior to and after the  
56 three-wave survey. Primary and secondary objectives with detailed plans for analyses for  
57  
58  
59  
60

1  
2  
3 studies involving registry data will be registered at ClinicalTrials.gov prior to obtaining the  
4 registry data, so that true hypothesis-testing studies from the REFUGE-cohort are  
5 distinguishable from more exploratory and data-driven studies. Finally, pending ethics  
6 approval, we will begin the process of merging the Norwegian REFUGE-cohort with existing  
7 datasets in Sweden, creating the REFUGE-database.  
8  
9  
10  
11  
12

13 Parallel to completing the survey data collection, data-merging and registry data obtainment,  
14 we aim to publish papers in accordance with our pre-registered publication plan at  
15 ClinicalTrials.gov.  
16  
17  
18  
19  
20

## 21 **COLLABORATION**

22  
23 We welcome potential collaboration with other research groups. Interested researchers should  
24 contact the REFUGE research group for collaboration and knowledge-sharing. Locally  
25 collected data can then be added to the REFUGE-database. Reference estimates (e.g.  
26 prevalence, incidence and associations) can then be continuously updated and made available  
27 to researchers abiding by the EU's GDPR laws and regulations. In addition, the REFUGE-  
28 database will also include data obtained through Scandinavian social and health-registries.  
29  
30  
31  
32  
33

34  
35 **Acknowledgements:** The authors would especially like to thank all participating refugees and  
36 asylum-seekers for taking part in both the main study and preparatory stages of the project.  
37 The authors would also like to thank the reference group for their valuable comments and  
38 suggestions along the way. Finally, we would like to give special thanks to our trusted Arabic  
39 interpreter/translator for excellent work throughout the project period.  
40  
41  
42  
43  
44

45  
46 **Contributors:** AN, PC, FS, AA and ØS contributed to the conception of this article. AN, PC,  
47 FS, AA and ØS were involved in manuscript writing and revision. AN and ØS were involved  
48 in data analysis and data presentation. All authors read, contributed substantially to and  
49 approved the final manuscript.  
50  
51  
52  
53

54 **Competing Interests:** None declared.  
55  
56

57  
58 **Funding:** The REFUGE-study was funded by the Norwegian Centre for Violence and  
59 Traumatic Stress Studies (NKVTS). No external funding was received.  
60

1  
2  
3  
4  
5 **Data availability:** Deidentified participant data will be made available for reuse upon  
6 reasonable request pending ethics approval, compliance with the General Data Protection  
7 Regulation (GDPR), and discretion of the research group with regard to the prospective  
8 research project proposal. Requests should be sent to [refuge@nkvts.no](mailto:refuge@nkvts.no). Additional  
9 information regarding the scales used, statistical analysis plans and future data collection is  
10 available through ClinicalTrials.gov (NCT03742128).  
11  
12  
13  
14  
15  
16

### 17 **Licence Statement**

18 I, the Submitting Author has the right to grant and does grant on behalf of all authors of the  
19 Work (as defined in the below author licence), an exclusive licence and/or a non-exclusive  
20 licence for contributions from authors who are: i) UK Crown employees; ii) where BMJ has  
21 agreed a CC-BY licence shall apply, and/or iii) in accordance with the terms applicable for  
22 US Federal Government officers or employees acting as part of their official duties; on a  
23 worldwide, perpetual, irrevocable, royalty-free basis to BMJ Publishing Group Ltd (“BMJ”)  
24 its licensees and where the relevant Journal is co-owned by BMJ to the co-owners of the  
25 Journal, to publish the Work in BMJ Open and any other BMJ products and to exploit all  
26 rights, as set out in our licence.  
27  
28  
29  
30  
31  
32  
33  
34  
35

36 The Submitting Author accepts and understands that any supply made under these terms is  
37 made by BMJ to the Submitting Author unless you are acting as an employee on behalf of  
38 your employer or a postgraduate student of an affiliated institution which is paying any  
39 applicable article publishing charge (“APC”) for Open Access articles. Where the Submitting  
40 Author wishes to make the Work available on an Open Access basis (and intends to pay the  
41 relevant APC), the terms of reuse of such Open Access shall be governed by a Creative  
42 Commons licence – details of these licences and which Creative Commons licence will apply  
43 to this Work are set out in our licence referred to above.  
44  
45  
46  
47  
48  
49  
50

### 51 **Figure legend:**

52  
53 **Figure 1:** Flowchart of participants through the study.

54  
55 <sup>1</sup> Refugees were either resettlement/quota refugees; asylum seekers who were granted asylum  
56 in Norway; or individuals coming through the program *Family immigration with a person*  
57  
58  
59  
60

1  
2  
3 *who has protection (asylum) in Norway.* The source population was identified through the  
4 Norwegian National Registry (NNR)

5  
6 <sup>2</sup> Information was obtained when non-responders were contacted during the telephone  
7 reminder  
8  
9

## 10 11 12 13 14 15 REFERENCES

- 16  
17  
18 1 United Nations High Commissioner for Refugees. UNHCR Global Trends 2018.  
19 UNHCR. [https://www.unhcr.org/statistics/unhcrstats/5d08d7ee7/unhcr-global-trends-](https://www.unhcr.org/statistics/unhcrstats/5d08d7ee7/unhcr-global-trends-2018.html)  
20 [2018.html](https://www.unhcr.org/statistics/unhcrstats/5d08d7ee7/unhcr-global-trends-2018.html) (accessed 2 Mar 2020).  
21  
22 2 Steel Z, Chey T, Silove D, *et al.* Association of torture and other potentially traumatic  
23 events with mental health outcomes among populations exposed to mass conflict and  
24 displacement: a systematic review and meta-analysis. *JAMA* 2009;**302**:537–49.  
25 doi:10.1001/jama.2009.1132  
26  
27 3 Marshall GN, Schell TL, Elliott MN, *et al.* Mental health of Cambodian refugees 2  
28 decades after resettlement in the United States. *JAMA* 2005;**294**:571–9.  
29 doi:10.1001/jama.294.5.571  
30  
31 4 Priebe S. *Public Health Aspects of Mental Health Among Migrants and Refugees: A*  
32 *Review of the Evidence on Mental Health Care for Refugees, Asylum Seekers and*  
33 *Irregular Migrants in the WHO European Region.* World Health Organization 2016.  
34 [https://play.google.com/store/books/details?id=Y\\_hQMQAACAAJ](https://play.google.com/store/books/details?id=Y_hQMQAACAAJ)  
35  
36 5 American Psychiatric Association. *Diagnostic and statistical manual of mental*  
37 *disorders, (5th ed.)*. Washington, DC: Author 2013.  
38  
39 6 WHO | International Classification of Diseases, 11th Revision (ICD-11). Published  
40 Online First: 11 October 2019. <https://www.who.int/classifications/icd/en/> (accessed 5  
41 Nov 2019).  
42  
43 7 de Vroome T, van Tubergen F. The Employment Experience of Refugees in the  
44 Netherlands. *Int Migr Rev* 2010;**44**:376–403. doi:10.1111/j.1747-7379.2010.00810.x  
45  
46 8 Schick M, Zumwald A, Knöpfli B, *et al.* Challenging future, challenging past: the  
47 relationship of social integration and psychological impairment in traumatized refugees.  
48 *Eur J Psychotraumatol* 2016;**7**:28057. doi:10.3402/ejpt.v7.28057  
49  
50 9 Bakker L, Dagevos J, Engbersen G. The Importance of Resources and Security in the  
51 Socio-Economic Integration of Refugees. A Study on the Impact of Length of Stay in  
52 Asylum Accommodation and Residence Status on Socio-Economic Integration for the  
53 Four Largest Refugee Groups in the Netherlands. *Journal of International Migration and*  
54 *Integration* 2014;**15**:431–48. doi:10.1007/s12134-013-0296-2  
55  
56 10 Beiser M. The health of immigrants and refugees in Canada. *Can J Public Health*  
57  
58  
59  
60



- 2005;**96 Suppl 2**:S30–44.<https://www.ncbi.nlm.nih.gov/pubmed/16078554>
- 11 Population Characteristics Norway. ssb.no.  
<https://www.ssb.no/en/befolkning/nokkeltall/population> (accessed 2 Mar 2020).
  - 12 Characteristics of persons with refugee background in Norway. ssb.no.  
<https://www.ssb.no/en/flyktninger> (accessed 2 Mar 2020).
  - 13 Want to apply. UDI. <https://www.udi.no/en/want-to-apply/> (accessed 2 Mar 2020).
  - 14 Global Trends - Forced Displacement in 2018 - UNHCR. UNHCR Global Trends 2018.  
<https://www.unhcr.org/globaltrends2018/> (accessed 26 Oct 2019).
  - 15 Where Syrian refugees have resettled worldwide. Pew Research Center.  
<https://www.pewresearch.org/fact-tank/2018/01/29/where-displaced-syrians-have-resettled/> (accessed 26 Oct 2019).
  - 16 Johnson CM, Rostila M, Svensson AC, *et al.* The role of social capital in explaining mental health inequalities between immigrants and Swedish-born: a population-based cross-sectional study. *BMC Public Health* 2017;**17**:117. doi:10.1186/s12889-016-3955-3s
  - 17 Khawaja M, Tewtel-Salem M, Obeid M, *et al.* Civic engagement, gender and self-rated health in poor communities: Evidence from Jordan's refugee camps. *Health Sociol Rev* 2006;**15**:192–208.<https://www.tandfonline.com/doi/abs/10.5172/hesr.2006.15.2.192>
  - 18 Lindström M, Hanson BS, Ostergren PO. Socioeconomic differences in leisure-time physical activity: the role of social participation and social capital in shaping health related behaviour. *Soc Sci Med* 2001;**52**:441–51. doi:10.1016/s0277-9536(00)00153-2
  - 19 Ager A, Strang A. Understanding Integration: A Conceptual Framework. *J Refug Stud* 2008;**21**:166–91. doi:10.1093/jrs/fen016
  - 20 Castles S, Korac M, Vasta E, *et al.* Integration: Mapping the field. *Home Office online report* 2002;**29**:115–8.
  - 21 Niemi M, Manhica H, Gunnarsson D, *et al.* A Scoping Review and Conceptual Model of Social Participation and Mental Health among Refugees and Asylum Seekers. *Int J Environ Res Public Health* 2019;**16**. doi:10.3390/ijerph16204027
  - 22 Hynie, M, Korn, A, Tao, D. Social context and social integration for Government Assisted Refugees in Ontario, Canada. In: Poteet, M, Nourpanah, S, eds. *After the Flight: The Dynamics of Refugee Settlement and Integration*. Newcastle upon Tyne, UK: Cambridge Scholars; 2016:183–227
  - 23 Thombs BD, Kwakkenbos L, Levis AW, *et al.* Addressing overestimation of the prevalence of depression based on self-report screening questionnaires. *Canadian Medical Association Journal*. 2018;**190**:E44–9. doi:10.1503/cmaj.170691
  - 24 Hoffman YSG, Diamond GM, Lipsitz JD. The challenge of estimating PTSD prevalence in the context of ongoing trauma: the example of Israel during the Second Intifada. *J Anxiety Disord* 2011;**25**:788–93. doi:10.1016/j.janxdis.2011.03.016

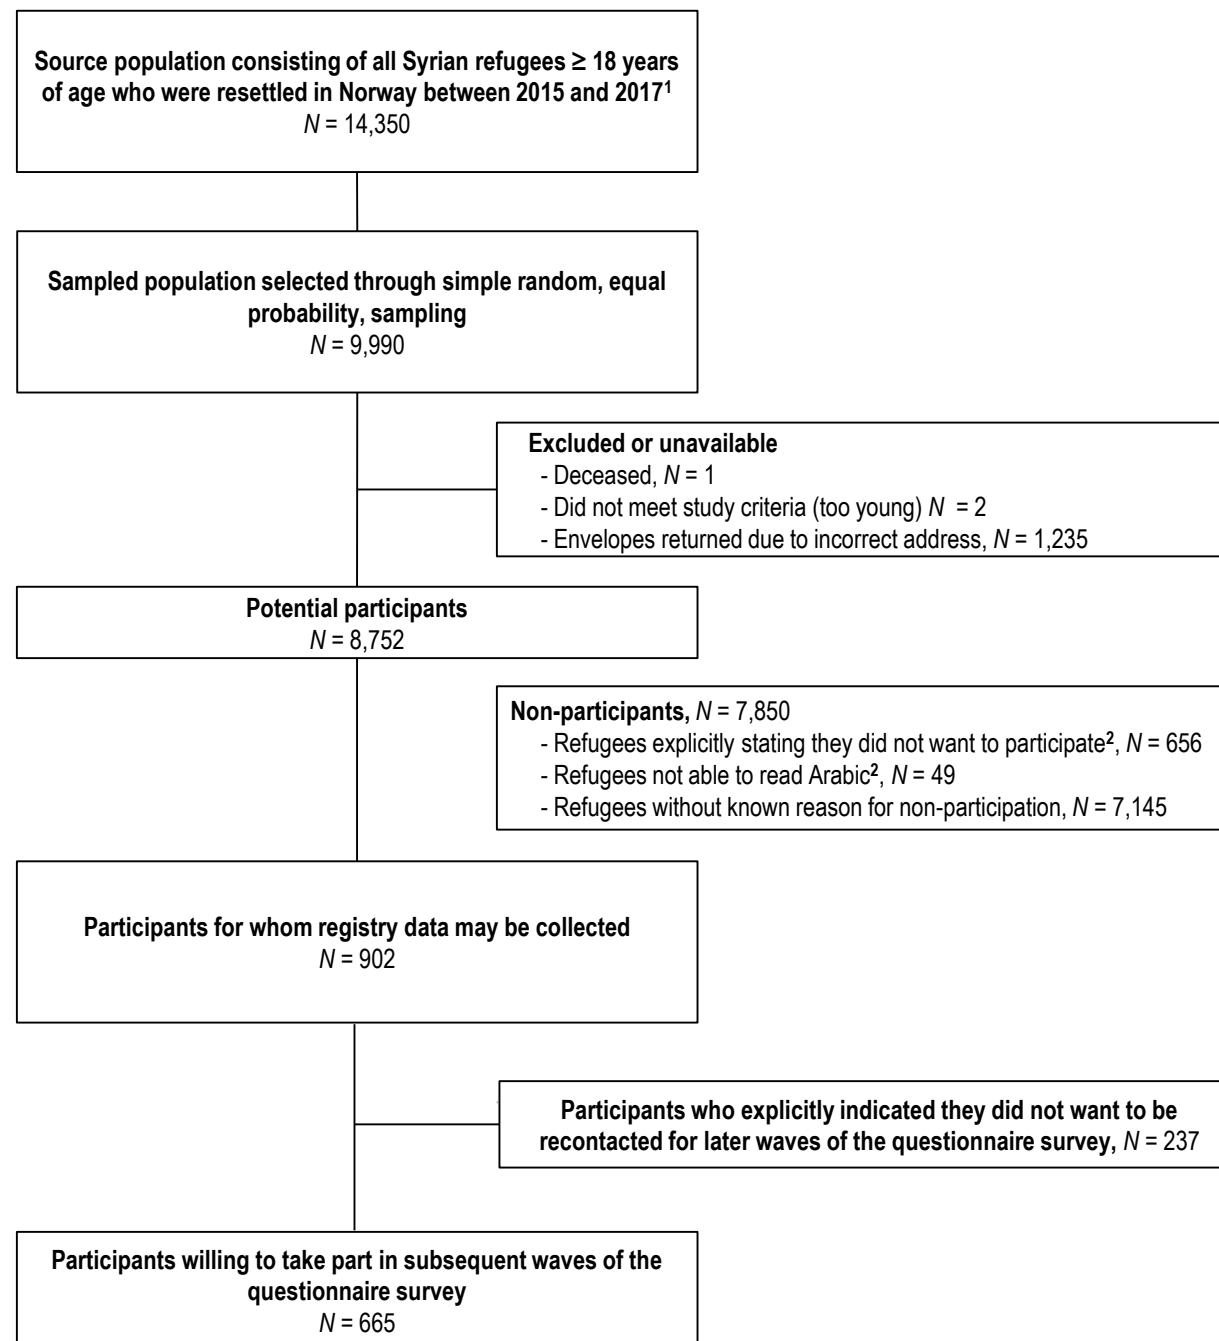



Table S1. Responses given by initial non-responders during telephone reminder sessions (N = 2,087)

|                                                                 | N     | (%)     |
|-----------------------------------------------------------------|-------|---------|
| Answers given by refugees                                       |       |         |
| Would like to participate and does not need a new questionnaire | 403   | (19.1)  |
| Would like to participate and needs a new questionnaire         | 856   | (40.8)  |
| Does not want to participate                                    | 656   | (30.8)  |
| Moved and wants a new questionnaire                             | 69    | (3.3)   |
| Moved and does not want a new questionnaire                     | 29    | (1.4)   |
| Wrong number/person                                             | 25    | (1.2)   |
| Does not understand Arabic                                      | 49    | (2.4)   |
| Total                                                           | 2,087 | (100.0) |

Table S2. Geographical distribution across Norway's 18 counties for participants and sample population of refugees from Syria

|                  | Sample population<br>N = 9,990 |         | Participants<br>N = 902 |         |
|------------------|--------------------------------|---------|-------------------------|---------|
|                  | n                              | (%)     | n                       | (%)     |
| Akershus         | 703                            | (7.0)   | 52                      | (5.7)   |
| Aust-Agder       | 347                            | (3.5)   | 30                      | (3.3)   |
| Buskerud         | 470                            | (4.7)   | 39                      | (4.3)   |
| Finnmark         | 254                            | (2.5)   | 23                      | (2.6)   |
| Hedmark          | 311                            | (3.1)   | 30                      | (3.3)   |
| Hordaland        | 1,009                          | (10.1)  | 88                      | (9.8)   |
| Møre og Romsdal  | 486                            | (4.9)   | 51                      | (5.7)   |
| Nordland         | 670                            | (6.7)   | 65                      | (7.2)   |
| Oppland          | 381                            | (3.8)   | 37                      | (4.1)   |
| Oslo             | 773                            | (7.7)   | 70                      | (7.9)   |
| Rogaland         | 831                            | (8.3)   | 63                      | (7.0)   |
| Sogn og Fjordane | 380                            | (3.8)   | 34                      | (3.8)   |
| Telemark         | 398                            | (4.0)   | 40                      | (4.4)   |
| Troms            | 449                            | (4.5)   | 51                      | (5.7)   |
| Trøndelag        | 1,049                          | (10.5)  | 96                      | (10.5)  |
| Vest-Agder       | 520                            | (5.2)   | 50                      | (5.5)   |
| Vestfold         | 475                            | (4.8)   | 44                      | (4.9)   |
| Østfold          | 484                            | (4.9)   | 39                      | (4.3)   |
| Total            | 9,990                          | (100.0) | 902                     | (100.0) |

Table S3. Demographic characteristics of participating refugees from Syria according to when they returned the questionnaire

|                    | 4 <sup>th</sup> quarter<br>2018 |         | 1 <sup>st</sup> quarter<br>2019 |         | 2 <sup>nd</sup> quarter<br>2019 |         | 3 <sup>rd</sup> quarter<br>2019 |         | Total |         | Chi-<br>square |
|--------------------|---------------------------------|---------|---------------------------------|---------|---------------------------------|---------|---------------------------------|---------|-------|---------|----------------|
|                    | n                               | (%)     | n                               | (%)     | n                               | (%)     | n                               | (%)     | n     | (%)     |                |
| Gender             |                                 |         |                                 |         |                                 |         |                                 |         |       |         | 0.08           |
| Male               | 278                             | (64.2)  | 66                              | (69.5)  | 157                             | (68.0)  | 77                              | (55.8)  | 578   | (64.4)  |                |
| Female             | 155                             | (35.8)  | 29                              | (30.5)  | 74                              | (32.0)  | 61                              | (44.2)  | 319   | (35.6)  |                |
| Total              | 433                             | (100.0) | 95                              | (100.0) | 231                             | (100.0) | 138                             | (100.0) | 897   | (100.0) |                |
| Age groups         |                                 |         |                                 |         |                                 |         |                                 |         |       |         | 0.36           |
| 18-29              | 87                              | (20.1)  | 28                              | (29.5)  | 50                              | (21.6)  | 31                              | (22.5)  | 196   | (21.9)  |                |
| 30-39              | 142                             | (32.8)  | 28                              | (29.5)  | 88                              | (38.1)  | 50                              | (36.2)  | 308   | (34.3)  |                |
| 40-49              | 122                             | (28.2)  | 19                              | (20.0)  | 52                              | (22.5)  | 36                              | (26.1)  | 229   | (25.5)  |                |
| 50-64              | 72                              | (16.6)  | 19                              | (20.0)  | 37                              | (16.1)  | 16                              | (11.6)  | 144   | (15.6)  |                |
| >64                | 10                              | (2.3)   | 1                               | (1.0)   | 4                               | (1.7)   | 5                               | (3.6)   | 20    | (2.7)   |                |
| Total              | 433                             | (100.0) | 95                              | (100.0) | 231                             | (100.0) | 138                             | (100.0) | 897   | (100.0) |                |
| Civil status       |                                 |         |                                 |         |                                 |         |                                 |         |       |         | 0.10           |
| Unmarried          | 121                             | (27.9)  | 31                              | (32.6)  | 60                              | (26.0)  | 22                              | (15.9)  | 234   | (26.1)  |                |
| Married            | 276                             | (63.7)  | 58                              | (61.1)  | 154                             | (66.7)  | 104                             | (75.4)  | 592   | (66.0)  |                |
| Other <sup>1</sup> | 36                              | (8.3)   | 6                               | (6.3)   | 17                              | (7.4)   | 12                              | (8.7)   | 71    | (7.9)   |                |
| Total              | 433                             | (100.0) | 95                              | (100.0) | 231                             | (100.0) | 138                             | (100.0) | 897   | (100.0) |                |
| Education          |                                 |         |                                 |         |                                 |         |                                 |         |       |         | 0.53           |
| 9 years or less    | 187                             | (44.4)  | 38                              | (42.2)  | 111                             | (48.7)  | 53                              | (38.4)  | 389   | (44.4)  |                |
| 10-12 years        | 74                              | (17.6)  | 18                              | (20.0)  | 35                              | (15.4)  | 31                              | (22.5)  | 158   | (18.0)  |                |
| More than 12 years | 160                             | (38.0)  | 34                              | (37.8)  | 82                              | (36.0)  | 54                              | (39.1)  | 330   | (37.6)  |                |
| Total              | 421                             | (100.0) | 90                              | (100.0) | 228                             | (100.0) | 138                             | (100.0) | 877   | (100.0) |                |

<sup>1</sup> Includes: divorced, widow(er), separated

Table S4. Refugee and migratory characteristics of participating refugees from Syria according to when they returned the questionnaire

|                                 | 4 <sup>th</sup> quarter<br>2018 |         | 1 <sup>st</sup> quarter<br>2019 |         | 2 <sup>nd</sup> quarter<br>2019 |         | 3 <sup>rd</sup> quarter<br>2019 |         | Total |         | Chi-<br>square |
|---------------------------------|---------------------------------|---------|---------------------------------|---------|---------------------------------|---------|---------------------------------|---------|-------|---------|----------------|
|                                 | n                               | (%)     | n                               | (%)     | n                               | (%)     | n                               | (%)     | n     | (%)     |                |
| Ref. status upon arrival        |                                 |         |                                 |         |                                 |         |                                 |         |       |         | 0.01           |
| Asylum seeker                   | 208                             | (50.5)  | 54                              | (61.4)  | 122                             | (54.7)  | 66                              | (48.5)  | 450   | (52.4)  |                |
| Quota refugee                   | 147                             | (35.7)  | 20                              | (22.7)  | 70                              | (31.4)  | 35                              | (25.7)  | 272   | (31.7)  |                |
| Family reunion                  | 55                              | (13.3)  | 14                              | (15.9)  | 31                              | (13.9)  | 33                              | (24.3)  | 133   | (15.5)  |                |
| Other                           | 2                               | (0.5)   | 0                               | (0.0)   | 0                               | (0.0)   | 2                               | (1.5)   | 4     | (0.5)   |                |
| Total                           | 412                             | (100.0) | 88                              | (100.0) | 223                             | (100.0) | 136                             | (100.0) | 859   | (100.0) |                |
| Arrived in Norway...            |                                 |         |                                 |         |                                 |         |                                 |         |       |         | 0.47           |
| ...alone                        | 121                             | (28.8)  | 30                              | (32.6)  | 64                              | (28.1)  | 31                              | (23.0)  | 246   | (28.1)  |                |
| ...with friends only            | 31                              | (7.4)   | 7                               | (7.6)   | 11                              | (4.8)   | 7                               | (5.2)   | 56    | (6.4)   |                |
| ...with family                  | 268                             | (63.8)  | 55                              | (59.8)  | 153                             | (67.1)  | 97                              | (71.9)  | 573   | (65.5)  |                |
| Total                           | 420                             | (100.0) | 92                              | (100.0) | 228                             | (100.0) | 135                             | (100.0) | 875   | (100.0) |                |
| Length of flight                |                                 |         |                                 |         |                                 |         |                                 |         |       |         | 0.87           |
| Less than 3 months              | 110                             | (35.7)  | 28                              | (38.4)  | 65                              | (39.9)  | 39                              | (37.5)  | 242   | (37.6)  |                |
| 3 to 12 months                  | 33                              | (10.7)  | 6                               | (8.2)   | 20                              | (12.3)  | 14                              | (17.5)  | 73    | (11.3)  |                |
| 1 to 2 years                    | 40                              | (13.0)  | 9                               | (12.3)  | 20                              | (12.3)  | 10                              | (7.5)   | 79    | (12.3)  |                |
| 2 to 3 years                    | 40                              | (13.0)  | 14                              | (19.2)  | 24                              | (14.7)  | 15                              | (17.5)  | 93    | (14.4)  |                |
| More than 3 years               | 85                              | (27.6)  | 16                              | (21.9)  | 34                              | (20.8)  | 22                              | (20.0)  | 157   | (24.4)  |                |
| Total                           | 308                             | (100.0) | 73                              | (100.0) | 163                             | (100.0) | 100                             | (100.0) | 644   | (100.0) |                |
| Residency time in<br>Norway     |                                 |         |                                 |         |                                 |         |                                 |         |       |         | <0.001         |
| Less than 2 years               | 81                              | (22.0)  | 14                              | (17.3)  | 22                              | (11.3)  | 9                               | (8.2)   | 126   | (16.7)  |                |
| 2-3 years                       | 82                              | (22.2)  | 16                              | (19.8)  | 39                              | (20.0)  | 27                              | (24.6)  | 164   | (21.7)  |                |
| 3-4 years                       | 184                             | (49.8)  | 44                              | (54.3)  | 106                             | (54.4)  | 51                              | (46.3)  | 385   | (46.4)  |                |
| More than 4 years               | 22                              | (6.0)   | 7                               | (8.6)   | 28                              | (14.3)  | 23                              | (20.9)  | 80    | (10.6)  |                |
| Total                           | 369                             | (100.0) | 81                              | (100.0) | 195                             | (100.0) | 110                             | (100.0) | 755   | (100.0) |                |
| PTEs before flight <sup>1</sup> |                                 |         |                                 |         |                                 |         |                                 |         |       |         | <0.001         |
| 0-1                             | 34                              | (7.9)   | 10                              | (10.6)  | 34                              | (14.8)  | 15                              | (11.3)  | 93    | (10.5)  |                |
| 2-3                             | 101                             | (23.4)  | 25                              | (26.6)  | 86                              | (37.4)  | 29                              | (21.8)  | 241   | (27.1)  |                |
| 4-5                             | 185                             | (42.9)  | 34                              | (36.2)  | 75                              | (32.6)  | 64                              | (48.1)  | 358   | (40.3)  |                |
| >5                              | 111                             | (25.8)  | 25                              | (26.6)  | 35                              | (15.2)  | 25                              | (18.8)  | 196   | (22.1)  |                |
| Total                           | 431                             | (100.0) | 94                              | (100.0) | 230                             | (100.0) | 133                             | (100.0) | 888   | (100.0) |                |
| PTEs during flight <sup>1</sup> |                                 |         |                                 |         |                                 |         |                                 |         |       |         | 0.46           |
| 0-1                             | 154                             | (36.8)  | 31                              | (34.1)  | 96                              | (42.7)  | 54                              | (41.9)  | 335   | (38.8)  |                |
| 2-3                             | 143                             | (34.2)  | 32                              | (35.1)  | 71                              | (31.6)  | 33                              | (25.6)  | 279   | (32.3)  |                |
| 4-5                             | 89                              | (21.3)  | 19                              | (20.9)  | 48                              | (21.3)  | 32                              | (24.8)  | 188   | (21.8)  |                |
| >5                              | 32                              | (7.7)   | 9                               | (9.9)   | 10                              | (4.4)   | 10                              | (7.7)   | 61    | (7.1)   |                |
| Total                           | 418                             | (100.0) | 91                              | (100.0) | 225                             | (100.0) | 129                             | (100.0) | 863   | (100.0) |                |

<sup>1</sup> All individuals with at least one answered item on the PTE-scale were given a sum-score for total PTEs before/during flight
