# Supplementary material for: Cohort profile: Resettlement in Uprooted Groups Explored (REFUGE)—a longitudinal study of mental health and integration in adult refugees from Syria resettled in Norway between 2015 and 2017
Source: PubMed Central journal article supplement — BMJ Open. 2020 Jul 1;10(7):e036101. doi: 10.1136/bmjopen-2019-036101 (PMC7332190; doi:10.1136/bmjopen-2019-036101), 2020-07-01
Supplement: bmjopen-2019-036101supp001.pdf [file bmjopen-2019-036101supp001.pdf]

Table S1. Responses given by initial non-responders during telephone reminder sessions (N = 2,087)

|                                                                 | <b>N</b>     | <b>(%)</b>     |
|-----------------------------------------------------------------|--------------|----------------|
| <b>Answers given by refugees</b>                                |              |                |
| Would like to participate and does not need a new questionnaire | 403          | (19.1)         |
| Would like to participate and needs a new questionnaire         | 856          | (40.8)         |
| Does not want to participate                                    | 656          | (30.8)         |
| Moved and wants a new questionnaire                             | 69           | (3.3)          |
| Moved and does not want a new questionnaire                     | 29           | (1.4)          |
| Wrong number/person                                             | 25           | (1.2)          |
| Does not understand Arabic                                      | 49           | (2.4)          |
| <b>Total</b>                                                    | <b>2,087</b> | <b>(100.0)</b> |

Table S2. Geographical distribution across Norway's 18 counties for participants and sample population of refugees from Syria

|                  | Sample population<br>N = 9,990 |         | Participants<br>N = 902 |         |
|------------------|--------------------------------|---------|-------------------------|---------|
|                  | n                              | (%)     | n                       | (%)     |
| Akershus         | 703                            | (7.0)   | 52                      | (5.7)   |
| Aust-Agder       | 347                            | (3.5)   | 30                      | (3.3)   |
| Buskerud         | 470                            | (4.7)   | 39                      | (4.3)   |
| Finnmark         | 254                            | (2.5)   | 23                      | (2.6)   |
| Hedmark          | 311                            | (3.1)   | 30                      | (3.3)   |
| Hordaland        | 1,009                          | (10.1)  | 88                      | (9.8)   |
| Møre og Romsdal  | 486                            | (4.9)   | 51                      | (5.7)   |
| Nordland         | 670                            | (6.7)   | 65                      | (7.2)   |
| Oppland          | 381                            | (3.8)   | 37                      | (4.1)   |
| Oslo             | 773                            | (7.7)   | 70                      | (7.9)   |
| Rogaland         | 831                            | (8.3)   | 63                      | (7.0)   |
| Sogn og Fjordane | 380                            | (3.8)   | 34                      | (3.8)   |
| Telemark         | 398                            | (4.0)   | 40                      | (4.4)   |
| Troms            | 449                            | (4.5)   | 51                      | (5.7)   |
| Trøndelag        | 1,049                          | (10.5)  | 96                      | (10.5)  |
| Vest-Agder       | 520                            | (5.2)   | 50                      | (5.5)   |
| Vestfold         | 475                            | (4.8)   | 44                      | (4.9)   |
| Østfold          | 484                            | (4.9)   | 39                      | (4.3)   |
| Total            | 9,990                          | (100.0) | 902                     | (100.0) |

Table S3. Demographic characteristics of participating refugees from Syria according to *when* they returned the questionnaire

|                     | 4 <sup>th</sup> quarter<br>2018 |         | 1 <sup>st</sup> quarter<br>2019 |         | 2 <sup>nd</sup> quarter<br>2019 |         | 3 <sup>rd</sup> quarter<br>2019 |         | Total    |         | Chi-<br>square |
|---------------------|---------------------------------|---------|---------------------------------|---------|---------------------------------|---------|---------------------------------|---------|----------|---------|----------------|
|                     | <i>n</i>                        | (%)     | <i>n</i>                        | (%)     | <i>n</i>                        | (%)     | <i>n</i>                        | (%)     | <i>n</i> | (%)     |                |
| <b>Gender</b>       |                                 |         |                                 |         |                                 |         |                                 |         |          |         | 0.08           |
| Male                | 278                             | (64.2)  | 66                              | (69.5)  | 157                             | (68.0)  | 77                              | (55.8)  | 578      | (64.4)  |                |
| Female              | 155                             | (35.8)  | 29                              | (30.5)  | 74                              | (32.0)  | 61                              | (44.2)  | 319      | (35.6)  |                |
| Total               | 433                             | (100.0) | 95                              | (100.0) | 231                             | (100.0) | 138                             | (100.0) | 897      | (100.0) |                |
| <b>Age groups</b>   |                                 |         |                                 |         |                                 |         |                                 |         |          |         | 0.36           |
| 18-29               | 87                              | (20.1)  | 28                              | (29.5)  | 50                              | (21.6)  | 31                              | (22.5)  | 196      | (21.9)  |                |
| 30-39               | 142                             | (32.8)  | 28                              | (29.5)  | 88                              | (38.1)  | 50                              | (36.2)  | 308      | (34.3)  |                |
| 40-49               | 122                             | (28.2)  | 19                              | (20.0)  | 52                              | (22.5)  | 36                              | (26.1)  | 229      | (25.5)  |                |
| 50-64               | 72                              | (16.6)  | 19                              | (20.0)  | 37                              | (16.1)  | 16                              | (11.6)  | 144      | (15.6)  |                |
| >64                 | 10                              | (2.3)   | 1                               | (1.0)   | 4                               | (1.7)   | 5                               | (3.6)   | 20       | (2.7)   |                |
| Total               | 433                             | (100.0) | 95                              | (100.0) | 231                             | (100.0) | 138                             | (100.0) | 897      | (100.0) |                |
| <b>Civil status</b> |                                 |         |                                 |         |                                 |         |                                 |         |          |         | 0.10           |
| Unmarried           | 121                             | (27.9)  | 31                              | (32.6)  | 60                              | (26.0)  | 22                              | (15.9)  | 234      | (26.1)  |                |
| Married             | 276                             | (63.7)  | 58                              | (61.1)  | 154                             | (66.7)  | 104                             | (75.4)  | 592      | (66.0)  |                |
| Other <sup>1</sup>  | 36                              | (8.3)   | 6                               | (6.3)   | 17                              | (7.4)   | 12                              | (8.7)   | 71       | (7.9)   |                |
| Total               | 433                             | (100.0) | 95                              | (100.0) | 231                             | (100.0) | 138                             | (100.0) | 897      | (100.0) |                |
| <b>Education</b>    |                                 |         |                                 |         |                                 |         |                                 |         |          |         | 0.53           |
| 9 years or less     | 187                             | (44.4)  | 38                              | (42.2)  | 111                             | (48.7)  | 53                              | (38.4)  | 389      | (44.4)  |                |
| 10-12 years         | 74                              | (17.6)  | 18                              | (20.0)  | 35                              | (15.4)  | 31                              | (22.5)  | 158      | (18.0)  |                |
| More than 12 years  | 160                             | (38.0)  | 34                              | (37.8)  | 82                              | (36.0)  | 54                              | (39.1)  | 330      | (37.6)  |                |
| Total               | 421                             | (100.0) | 90                              | (100.0) | 228                             | (100.0) | 138                             | (100.0) | 877      | (100.0) |                |

<sup>1</sup> Includes: divorced, widow(er), separated

Table S4. Refugee and migratory characteristics of participating refugees from Syria according to when they returned the questionnaire

|                                       | 4 <sup>th</sup> quarter<br>2018 |         | 1 <sup>st</sup> quarter<br>2019 |         | 2 <sup>nd</sup> quarter<br>2019 |         | 3 <sup>rd</sup> quarter<br>2019 |         | Total |         | Chi-<br>square |
|---------------------------------------|---------------------------------|---------|---------------------------------|---------|---------------------------------|---------|---------------------------------|---------|-------|---------|----------------|
|                                       | n                               | (%)     | n                               | (%)     | n                               | (%)     | n                               | (%)     | n     | (%)     |                |
| <b>Ref. status upon arrival</b>       |                                 |         |                                 |         |                                 |         |                                 |         |       |         | 0.01           |
| Asylum seeker                         | 208                             | (50.5)  | 54                              | (61.4)  | 122                             | (54.7)  | 66                              | (48.5)  | 450   | (52.4)  |                |
| Quota refugee                         | 147                             | (35.7)  | 20                              | (22.7)  | 70                              | (31.4)  | 35                              | (25.7)  | 272   | (31.7)  |                |
| Family reunion                        | 55                              | (13.3)  | 14                              | (15.9)  | 31                              | (13.9)  | 33                              | (24.3)  | 133   | (15.5)  |                |
| Other                                 | 2                               | (0.5)   | 0                               | (0.0)   | 0                               | (0.0)   | 2                               | (1.5)   | 4     | (0.5)   |                |
| Total                                 | 412                             | (100.0) | 88                              | (100.0) | 223                             | (100.0) | 136                             | (100.0) | 859   | (100.0) |                |
| <b>Arrived in Norway...</b>           |                                 |         |                                 |         |                                 |         |                                 |         |       |         | 0.47           |
| ...alone                              | 121                             | (28.8)  | 30                              | (32.6)  | 64                              | (28.1)  | 31                              | (23.0)  | 246   | (28.1)  |                |
| ...with friends only                  | 31                              | (7.4)   | 7                               | (7.6)   | 11                              | (4.8)   | 7                               | (5.2)   | 56    | (6.4)   |                |
| ...with family                        | 268                             | (63.8)  | 55                              | (59.8)  | 153                             | (67.1)  | 97                              | (71.9)  | 573   | (65.5)  |                |
| Total                                 | 420                             | (100.0) | 92                              | (100.0) | 228                             | (100.0) | 135                             | (100.0) | 875   | (100.0) |                |
| <b>Length of flight</b>               |                                 |         |                                 |         |                                 |         |                                 |         |       |         | 0.87           |
| Less than 3 months                    | 110                             | (35.7)  | 28                              | (38.4)  | 65                              | (39.9)  | 39                              | (37.5)  | 242   | (37.6)  |                |
| 3 to 12 months                        | 33                              | (10.7)  | 6                               | (8.2)   | 20                              | (12.3)  | 14                              | (17.5)  | 73    | (11.3)  |                |
| 1 to 2 years                          | 40                              | (13.0)  | 9                               | (12.3)  | 20                              | (12.3)  | 10                              | (7.5)   | 79    | (12.3)  |                |
| 2 to 3 years                          | 40                              | (13.0)  | 14                              | (19.2)  | 24                              | (14.7)  | 15                              | (17.5)  | 93    | (14.4)  |                |
| More than 3 years                     | 85                              | (27.6)  | 16                              | (21.9)  | 34                              | (20.8)  | 22                              | (20.0)  | 157   | (24.4)  |                |
| Total                                 | 308                             | (100.0) | 73                              | (100.0) | 163                             | (100.0) | 100                             | (100.0) | 644   | (100.0) |                |
| <b>Residency time in Norway</b>       |                                 |         |                                 |         |                                 |         |                                 |         |       |         | <0.001         |
| Less than 2 years                     | 81                              | (22.0)  | 14                              | (17.3)  | 22                              | (11.3)  | 9                               | (8.2)   | 126   | (16.7)  |                |
| 2-3 years                             | 82                              | (22.2)  | 16                              | (19.8)  | 39                              | (20.0)  | 27                              | (24.6)  | 164   | (21.7)  |                |
| 3-4 years                             | 184                             | (49.8)  | 44                              | (54.3)  | 106                             | (54.4)  | 51                              | (46.3)  | 385   | (46.4)  |                |
| More than 4 years                     | 22                              | (6.0)   | 7                               | (8.6)   | 28                              | (14.3)  | 23                              | (20.9)  | 80    | (10.6)  |                |
| Total                                 | 369                             | (100.0) | 81                              | (100.0) | 195                             | (100.0) | 110                             | (100.0) | 755   | (100.0) |                |
| <b>PTEs before flight<sup>1</sup></b> |                                 |         |                                 |         |                                 |         |                                 |         |       |         | <0.001         |
| 0-1                                   | 34                              | (7.9)   | 10                              | (10.6)  | 34                              | (14.8)  | 15                              | (11.3)  | 93    | (10.5)  |                |
| 2-3                                   | 101                             | (23.4)  | 25                              | (26.6)  | 86                              | (37.4)  | 29                              | (21.8)  | 241   | (27.1)  |                |
| 4-5                                   | 185                             | (42.9)  | 34                              | (36.2)  | 75                              | (32.6)  | 64                              | (48.1)  | 358   | (40.3)  |                |
| >5                                    | 111                             | (25.8)  | 25                              | (26.6)  | 35                              | (15.2)  | 25                              | (18.8)  | 196   | (22.1)  |                |
| Total                                 | 431                             | (100.0) | 94                              | (100.0) | 230                             | (100.0) | 133                             | (100.0) | 888   | (100.0) |                |
| <b>PTEs during flight<sup>1</sup></b> |                                 |         |                                 |         |                                 |         |                                 |         |       |         | 0.46           |
| 0-1                                   | 154                             | (36.8)  | 31                              | (34.1)  | 96                              | (42.7)  | 54                              | (41.9)  | 335   | (38.8)  |                |
| 2-3                                   | 143                             | (34.2)  | 32                              | (35.1)  | 71                              | (31.6)  | 33                              | (25.6)  | 279   | (32.3)  |                |
| 4-5                                   | 89                              | (21.3)  | 19                              | (20.9)  | 48                              | (21.3)  | 32                              | (24.8)  | 188   | (21.8)  |                |
| >5                                    | 32                              | (7.7)   | 9                               | (9.9)   | 10                              | (4.4)   | 10                              | (7.7)   | 61    | (7.1)   |                |
| Total                                 | 418                             | (100.0) | 91                              | (100.0) | 225                             | (100.0) | 129                             | (100.0) | 863   | (100.0) |                |

<sup>1</sup> All individuals with at least one answered item on the PTE-scale were given a sum-score for total PTEs before/during flight
